# Supplementary material for: A global virome of methanogenic archaea highlights novel diversity and adaptations to the gut environment
Source: Research Square preprint supplement (doi:10.21203/rs.3.rs-2539466/v1), 2023-02-09
Supplement: Supplementary file 1 [file e35c933b6e826b6ca157f253.xlsx]

## Sheet: TableS1-genomes-db
	Methanogens' genomes database
		total number of genomes and MAGs	NCBI	UHGG [1]	IMG [2]	animal gut [3]
	Korarchaeota	32	32
	Methanobacteriales	1290	612	594	25	59
	Methanocellales	11	11
	Methanococcales	62	62
	NM3	34	34
	Methanofastidiosa	20	20
	Methanoliparales	22	22
	Methanomassiliicocci	410	344	62	4
	Methanomicrobiales	537	466	2	25	44
	Methanonatronarchaeia	5	5
	Methanopyrales	8	8
	Methanosarcinales	678	673			5
	Verstraetearchaeota	100	100
	Methanoflorentales	97	97
	Archaeaoglobus	19	19
	Thaumarchaeota (mcrA only)	3	3
	unclassified Euryarchaeaota from gut	108				108
	[1]-[3] additional
	[1] selection of archaeal genomes from UHGG - Unified Human Gastrointestinal Genome (https://doi,org/10,1038/s41587-020-0603-3)
	[2] IMG database (https://img,jgi,doe,gov/), Selection of host-associated genomes of methanogenic archaea
	[3] MAGs of methanogenic archaea reconstructed from animal gut metagenome samples availiable in the lab

## Sheet: TableS2-CRISPR-db
	methanogens' CRISPR db
		total number of genomes and MAGs	number of genomes with CRISPR	fraction of genomes with CRISPR, %	total number of spacers	average number of spacers per genome
	Korarchaeota	32	10	31.25	1132	113.2
	Methanobacteriales	1290	504	39.0698	26924	53.4206
	Methanocellales	11	5	45.4545	361	72.2
	Methanococcales	62	33	53.2258	3490	105.758
	NM3	54	4	0.117647	133	33.25
	Methanofastidiosa	20	7	0.35	434	62
	Methanoliparales	22	0	0	0	0
	Methanomassiliicocci	410	70	17.0732	3242	46.3143
	Methanomicrobiales	537	144	26.8156	10647	73.9375
	Methanonatronarchaeia	5	2	40	108	54
	Methanopyrales	8	2	25	45	22.5
	Methanosarcinales	678	285	42.0354	28968	101.642
	Verstraetearchaeota	100	13	13	959	73.7692
	Methanoflorentales	97	0	0	0	0
	Archaeaoglobus	19	8	42.1053	274	34.25
	Thaumarchaeota (mcrA only)	3	0	0	0	0
	unclassified Euryarchaeaota	108	31	28.7037	691	22.2903

## Sheet: TableS3-CheckV-completeness
contig_id	contig_length	proviral_length	aai_expected_length	aai_completeness	aai_confidence	aai_error	aai_num_hits	aai_top_hit	aai_id	aai_af	hmm_completeness_lower	hmm_completeness_upper	hmm_num_hits	kmer_freq
138_Spad_Metabat_bin108_108678_7	108678	NA	38067.90112680206	93.9243	high	2.35867891164223	6	DTR_599705	91.96	33.46	38.09522546401281	90.66217105906848	9	1.0
163_SpadScaf_Metabat2_bin157_47041_7	47041	NA	33777.0	100	medium	8.21957329009429	1	DTR_453008	47.61	39.39	59.1375999370329	99.99999999999999	6	1.0
3300021541_1:Ga0214529_10004	219700	NA	38741.321502863	100	low	13.0153246546824	13	DTR_770569	37.87	15.34	77.75187651053132	100.00000000000001	10	1.37
3300027907_36:Ga0207428_10000759	36745	NA	36618.0	100	high	0.840573760550598	1	DTR_328726	100.0	100.0	42.39596915537023	93.75687485731477	16	1.0
AELQ01000039.1	40343	NA	39626.63672629569	100	high	1.11872710057223	4	DTR_103385	96.31	98.5	51.703218658593094	100.0	10	1.0
AELS01000014.1	177233	NA	39624.8359421274	96.4017	low	70.0521900773386	4	DTR_103385	96.28	22.5	48.95389634352551	99.80129760656732	10	1.0
AP017646.1	3194059	NA	889865.5787640901	100	low	35.9439843853632	13	GCA_002956935.1	38.44	1.29	100.00000000000001	100.00000000000001	9	1.0
CAAFWR010000111.1	100808	NA	99066.55818887259	100	high	1.48335936798253	24	DTR_495588	96.43	88.77	67.40486002865451	100.0	11	1.0
CAAFWR010000123.1	87777	NA	86645.98088225022	100	high	0.840573760550598	112	DTR_382300	99.95	100.0	70.16626990635464	100.0	13	1.0
CACVUD010000006.1	193891	NA	83609.87843881248	100	low	34.0128276133136	7	GCA_002633645.1	49.05	2.12	100.00000000000001	100.00000000000001	2	1.0
CACVVD010000013.1	40532	NA	38942.0	100	high	1.49134182622626	1	DTR_170268	91.87	90.74	66.12441426623133	100.0	10	1.0
CACWBU010000008.1	42837	NA	44185.0	96.9492	high	4.60566459879996	1	DTR_882546	53.48	63.06	54.46584860585063	99.99999999999999	5	1.0
CACWVY010000014.1	146228	NA	53200.0	98.641	low	10.277080385265	1	DTR_833018	37.56	17.8	57.95042767510062	94.2866199212324	16	1.0
CACXMP010000001.1	157671	NA	145214.0	100	high	4.23688380255924	1	DTR_354721	41.54	44.83	92.2565344205183	99.93122087289161	13	1.0
CACXMP010000002.1	76696	NA	47394.0	100	medium	7.28870551160637	1	DTR_301676	43.23	22.53	75.10925716884346	100.0	12	1.0
CACXRW010000005.1	42190	NA	39764.871975383234	94.3119	medium	5.54305193017369	7	DTR_584019	42.05	38.25	45.66899915985572	99.42022868859885	8	1.0
CACYJR010000001.1	360654	NA	366915.65558094805	98.2934	medium	8.4020247521304	7	DTR_247199	49.51	53.45	99.56308691054633	100.0	30	1.0
CACYZI010000001.1	408338	NA	423292.0042299962	96.4672	low	21.8799554709198	10	DTR_238411	42.3	8.9	95.76363460741361	99.99999999999999	62	1.0
CACZOU010000058.1	37364	NA	40288.07061681477	92.7421	medium	6.12966984700227	12	DTR_241949	33.8	27.53	46.487887268181034	99.28530208167871	7	1.0
CACZUM010000001.1	127750	NA	53200.0	100	low	10.277080385265	1	DTR_833018	41.16	18.79	76.87491141632981	97.74724080944732	14	1.0
CADBWM010000001.1	228125	NA	53200.0	100	low	17.7366586216144	1	DTR_833018	37.03	10.9	95.54174015703059	96.35440810587704	16	1.0
CADBWM010000004.1	70675	NA	38532.449730370034	100	high	3.3811723832475	8	DTR_355747	54.17	19.65	48.88550072876668	99.99999999999999	8	1.0
CAILJG010000389.1	14172	NA	14684.983902579488	96.5067	high	2.64972286061917	2	DTR_308555	68.79	59.76	20.43076968746268	43.48940438075902	5	1.0
CAIOFJ010000187.1	73650	NA	62675.26565367518	100	low	26.0831970943911	15	DTR_204415	32.48	11.18	66.51028280267673	95.56083683272847	11	1.0
CAIOKB010000183.1	73650	NA	63992.57997434058	100	low	26.0831970943911	15	DTR_204415	32.48	11.18	66.51028280267673	95.56083683272847	11	1.0
CAIYAF010000127.1	36718	NA	38807.36865793297	94.6161	high	4.29143910316024	2	DTR_308549	55.43	15.06	59.144990141637386	99.19604980503256	7	1.0
CAIYHQ010000095.1	40561	NA	38958.20248046412	100	medium	7.00547478931288	4	DTR_360056	56.84	55.4	53.442112065974925	100.0	8	1.0
CP000678.1	1853160	NA	38074.164749049014	100	low	39.9812268786925	6	DTR_537163	91.16	1.83	41.20487991319641	99.56004121722013	10	1.0
CP000780.1	2542943	NA	785506.8936395068	100	low	33.4305729197674	22	GCA_002966405.1	31.54	1.48	100.0	100.0	1	1.0
CP000968.1	1590757	NA	709350.2379494306	100	low	34.9257320695997	21	GCA_002956935.1	33.08	1.66	100.0	100.0	1	1.0
CP001338.1	2922917	NA	892557.6148820614	100	low	33.4305729197674	14	GCA_002966405.1	29.84	1.58	100.0	100.0	4	1.0
CP001696.1	1485061	NA	891449.7410316954	100	low	33.4305729197674	11	GCA_002966405.1	31.22	1.73	100.0	100.0	6	1.0
CP001787.1	1746329	NA	928310.0232803002	100	low	34.9257320695997	7	GCA_002956935.1	35.28	1.57	100.00000000000001	100.00000000000001	7	1.0
CP002565.1	3008626	NA	232618.51219384055	100	low	35.9439843853632	176	DTR_078061	38.95	1.27	100.0	100.0	10	1.0
CP002792.1	1662525	NA	865166.3588753141	100	low	33.4305729197674	10	GCA_002966405.1	30.38	1.84	99.99999999999999	99.99999999999999	7	1.0
CP003167.1	2820858	NA	932094.9874039238	100	low	33.4305729197674	13	GCA_002924555.1	30.81	1.28	100.0	100.0	1	1.0
CP004050.1	1998189	NA	1030112.778518934	100	low	33.4305729197674	10	GCA_002966405.1	30.3	2.28	100.0	100.0	5	1.0
CP044013.1	1724502	NA	31007.0	100	low	40.0925271279702	1	GCA_000840645.2	92.57	1.38	100.00000000000001	100.00000000000001	10	1.0
CP064971.1	1951130	NA	842109.3955194387	100	low	33.4305729197674	14	GCA_000889395.1	30.51	1.55	99.99999999999999	99.99999999999999	2	1.0
CT05_Megh_Metabat2_bin36_90748_16	90748	NA	38070.23203211323	94.4307	high	1.72029180650737	6	DTR_599705	94.04	37.89	40.62260393432008	98.42011956616012	9	1.0
DAJF01000013.1	130120	NA	39711.06498923378	100	low	13.7450815046115	6	DTR_250645	45.35	14.39	52.27818053140398	100.00000000000001	8	1.0
DAQC01000001.1	1312066	NA	827469.4374718269	100	low	34.9257320695997	20	GCA_000889395.1	32.69	1.94	100.0	100.0	1	1.0
DUGU01000226.1	44807	NA	36535.62114307276	100	medium	8.86629837842375	2	DTR_349366	51.12	33.72	60.370178706092595	84.0778627322739	12	1.0
FPAO01000008.1	192318	NA	73313.0	100	low	21.8799554709198	1	DTR_267120	40.02	9.14	100.00000000000001	100.00000000000001	6	1.0
GUT_GENOME015165_12	38475	NA	39546.82873610153	97.2897	high	1.19037777961478	4	DTR_770569	91.46	93.67	50.39310134292832	99.89700990693751	9	1.0
GUT_GENOME018608_33	18993	NA	19935.0	95.2746	medium	5.99065324568611	1	DTR_732830	54.58	51.89	63.92510785263686	100.0	6	1.0
GUT_GENOME020722_6	165949	NA	38066.912485574576	100	low	79.6705627297577	6	DTR_599705	97.7	20.31	46.636639118935975	99.99999999999997	8	1.0
GUT_GENOME020819_1	334222	NA	38071.393696323685	100	low	82.2332340958947	6	DTR_599705	96.16	10.72	46.305145660597596	100.0	8	1.0
GUT_GENOME029117_7	51318	NA	53200.0	96.4624	high	4.60566459879996	1	DTR_833018	54.13	63.96	50.95892672066625	90.32940672966777	9	1.0
GUT_GENOME029865_11	50659	NA	38053.15161399942	100	high	2.41850203660504	6	DTR_583391	92.0	71.06	44.670909269018516	99.99999999999999	9	1.0
GUT_GENOME030002_4	63010	NA	38058.36732304715	95.8239	high	2.11631334189324	6	DTR_583391	92.39	51.06	40.72512170636839	99.53849536240666	9	1.0
GUT_GENOME030764_4	175041	NA	175195.72652033443	99.9117	high	1.48335936798253	10	DTR_508989	94.97	91.33	93.09064288511269	100.0	27	1.0
GUT_GENOME031842_1	289647	NA	38092.92777048233	99.5985	low	39.2262550232825	6	DTR_583391	92.02	11.81	44.41559373022346	100.0	8	1.0
GUT_GENOME037337_2	297193	NA	38095.032300913146	99.9448	low	39.2262550232825	6	DTR_583391	90.18	11.87	44.57271658237287	100.0	8	1.0
GUT_GENOME066320_11	149851	NA	38072.84410675257	100	high	1.93338398669323	6	DTR_541172	95.72	23.67	44.906923305632304	99.76569428288815	9	1.0
GUT_GENOME067420_22	152377	NA	38083.83557634761	97.9182	low	70.0521900773386	6	DTR_599705	95.89	22.15	42.18467276324783	99.30843893010767	9	1.0
GUT_GENOME067949_4	137330	NA	45048.83008536668	90.9258	medium	7.28870551160637	3	DTR_833018	46.9	23.4	50.02850109983571	99.96092754953867	9	1.0
GUT_GENOME075229_42	84346	NA	86746.88037140724	97.2323	high	1.11872710057223	112	DTR_541506	94.22	97.69	62.11397476286961	100.00000000000001	14	1.0
GUT_GENOME076595_155	83744	NA	87387.6748475868	95.8304	high	1.24961683866353	113	DTR_458259	93.37	96.47	66.19322167604251	100.0	12	1.0
GUT_GENOME083975_22	165161	NA	53200.0	99.8421	high	1.64646368651242	1	DTR_833018	96.28	29.52	51.27281510365267	88.50189130430016	8	1.0
GUT_GENOME086893_36	85960	NA	86608.73150194138	99.251	high	1.11872710057223	113	DTR_389609	97.05	97.71	68.65576136707816	99.99999999999997	13	1.0
GUT_GENOME087659_70	79366	NA	81992.0	96.7972	high	1.68749493288241	1	DTR_430387	97.65	92.31	54.884524310368235	99.91125313489745	13	1.0
GUT_GENOME088396_16	78880	NA	43583.060255154705	100	medium	6.32612307739211	4	DTR_833018	44.7	37.2	63.17550443260049	100.0	9	1.0
GUT_GENOME089164_19	84961	NA	86614.6998577284	98.0907	high	0.840573760550598	113	DTR_821358	100.0	100.0	68.15132432248717	99.99999999999999	13	1.0
GUT_GENOME090886_17	89723	NA	83624.44092976936	100	low	36.2703068873326	5	DTR_833018	86.35	2.78	55.3	91.12	1	1.0
GUT_GENOME093561_5	129154	NA	39525.59208153574	93.5698	high	2.08375028307424	4	DTR_770569	90.89	28.33	47.39678313654851	99.3491776678871	10	1.0
GUT_GENOME104819_1	434949	NA	38072.84410675257	100	low	82.2332340958947	6	DTR_541172	95.72	8.09	44.00521967659133	99.77144300904007	10	1.0
GUT_GENOME121029_3	48175	NA	39544.32872520634	100	high	2.35584600699916	4	DTR_770569	91.02	78.66	55.553619050680574	100.0	10	1.0
GUT_GENOME135072_11	52573	NA	53200.0	98.8214	medium	5.91862087798947	1	DTR_833018	47.47	55.65	64.21211263743446	100.0	9	1.0
GUT_GENOME135513_50	12105	NA	13215.037213400718	91.6002	low	11.345462708111	8	DTR_456042	33.87	27.85	36.75873867608834	85.57763528572595	5	1.0
GUT_GENOME138598_10	12282	NA	13215.037213400718	92.9396	low	11.345462708111	8	DTR_456042	33.87	27.68	37.29391948960182	86.31877635246887	5	1.0
GUT_GENOME150013_11	49477	NA	53200.0	93.0019	high	1.48335936798253	1	DTR_833018	95.1	89.72	48.585234430240725	88.70189094150572	9	1.0
GUT_GENOME175196_4	157793	NA	38088.5767126284	100	high	2.28031741395258	6	DTR_537163	91.73	23.76	46.390285368974006	100.0	8	1.0
GUT_GENOME186215_5	86568	NA	38084.15252192418	99.4692	high	1.72029180650737	6	DTR_537163	93.62	37.61	41.49578369112969	99.17292233747999	10	1.0
GUT_GENOME186606_5	86617	NA	38084.13907277022	99.5979	high	1.72029180650737	6	DTR_537163	93.62	37.61	41.54799056179994	99.19034498453605	10	1.0
GUT_GENOME188920_1	216693	NA	38088.26102999282	100	low	79.8881180949711	6	DTR_541172	98.05	15.59	43.990162795007286	99.84213818703738	10	1.0
GUT_GENOME190906_1	269661	NA	38088.26102999282	100	low	79.8881180949711	6	DTR_541172	98.05	12.57	43.995687650165905	99.84275243533686	10	1.0
GUT_GENOME191095_5	187663	NA	38083.08834835786	100	low	70.0521900773386	6	DTR_733507	95.01	18.98	47.39449807627327	100.0	8	1.0
GUT_GENOME191425_1	269753	NA	38088.26102999282	100	low	79.8881180949711	6	DTR_541172	98.05	12.57	43.990162795007286	99.84213818703738	10	1.0
GUT_GENOME191771_3	172343	NA	38086.21291263297	100	low	70.0521900773386	6	DTR_733507	95.43	19.69	44.76605178369727	100.0	8	1.0
GUT_GENOME192495_1	270555	NA	38088.26102999282	100	low	79.8881180949711	6	DTR_541172	98.05	12.52	43.995687650165905	99.84275243533686	10	1.0
GUT_GENOME193896_3	154178	NA	38065.46556261905	91.8733	medium	8.96360005015661	6	DTR_733507	90.05	21.08	37.01929157715837	98.31194943696305	10	1.0
GUT_GENOME205751_3	167910	NA	39535.953191388886	100	high	2.28031741395258	4	DTR_770569	90.35	22.87	59.16609469808928	100.0	10	1.0
GUT_GENOME206720_4	154058	NA	39535.953191388886	100	high	2.28031741395258	4	DTR_770569	90.35	24.79	59.142197503893726	100.0	10	1.0
GUT_GENOME207131_4	121636	NA	38079.764789239314	97.6871	high	2.08375028307424	6	DTR_541172	91.84	27.53	42.60044918795526	99.7206877481178	7	1.0
GUT_GENOME232921_111	100808	NA	99066.55818887259	100	high	1.48335936798253	24	DTR_495588	96.43	88.77	67.40486002865451	100.0	11	1.0
GUT_GENOME232921_123	87777	NA	86645.98088225022	100	high	0.840573760550598	112	DTR_382300	99.95	100.0	70.16626990635464	100.0	13	1.0
GUT_GENOME239182_111	49679	NA	53200.0	93.3816	medium	5.12360649723847	1	DTR_833018	46.52	41.24	49.36587560723063	90.61482256674127	10	1.0
GUT_GENOME247414_2	156521	NA	38087.68336465887	97.0314	high	2.28031741395258	6	DTR_733507	91.78	24.03	43.26474817896434	99.67561761097241	8	1.0
GUT_GENOME252780_8	89783	NA	44173.45775319682	92.3496	medium	6.32612307739211	4	DTR_833018	44.11	32.64	49.824504460654495	99.93549944685746	9	1.0
GUT_GENOME253812_1	545545	NA	45644.92877051317	100	low	39.2262550232825	6	DTR_876503	90.56	10.11	100.0	100.0	13	1.0
GUT_GENOME254471_17	41194	NA	38093.238774596386	100	high	2.17394166948312	6	DTR_583391	97.13	79.53	48.225846421697945	100.0	8	1.0
GUT_GENOME254573_3	196685	NA	38092.901261928346	100	low	79.6705627297577	6	DTR_583391	98.02	18.77	47.49484089675371	100.0	8	1.0
GUT_GENOME254932_9	65799	NA	65637.84255007406	100	high	1.24961683866353	7	DTR_078546	96.6	95.71	73.92473182057225	99.99999999999999	21	1.0
GUT_GENOME257022_2	297125	NA	38095.96966460475	99.4121	low	39.2262550232825	6	DTR_733507	91.44	11.92	42.79318636374155	99.46565765384938	9	1.0
GUT_GENOME258362_4	262433	NA	43961.00306818051	100	low	26.5187364960698	4	DTR_833018	48.89	11.83	55.40489964855724	100.0	9	1.0
GUT_GENOME259117_3	176285	NA	40992.20895434616	91.5759	low	32.6468103084073	8	DTR_733507	77.75	5.71	44.780450452303285	71.08346427856567	10	1.0
GUT_GENOME259830_2	230381	NA	38095.29636283683	100	low	82.2332340958947	6	DTR_583391	95.84	11.96	99.99999999999999	99.99999999999999	5	1.0
GUT_GENOME261378_6	54318	NA	53200.0	100	high	4.60566459879996	1	DTR_833018	53.69	63.51	53.93903216142709	90.9434126515936	9	1.0
GUT_GENOME261695_7	76903	NA	77605.56148613947	99.0947	high	1.11872710057223	3	DTR_625508	96.12	97.77	58.5812137056018	99.61663246543874	9	1.0
GUT_GENOME262284_5	63650	NA	38053.15161399942	100	high	2.14624450798522	6	DTR_583391	92.0	55.14	44.44198843573282	100.0	9	1.0
GUT_GENOME262465_3	63113	NA	38057.77107030341	91.4268	high	2.11631334189324	6	DTR_583391	92.38	51.14	38.85279652192067	98.53840453845545	9	1.0
GUT_GENOME265722_11	59951	NA	39561.16156065778	100	high	2.17522931704671	4	DTR_770569	84.51	45.58	78.0328630120826	100.00000000000003	8	1.0
GUT_GENOME265981_10	68807	NA	38074.18083205849	98.3107	high	1.72373158544775	6	DTR_733507	95.11	45.07	42.31706866084025	99.39895000485686	9	1.0
GUT_GENOME266012_4	45330	NA	38076.64104203027	91.9671	high	2.3286398834553	6	DTR_733507	95.23	70.93	39.59103733841101	97.73168492974386	9	1.0
GUT_GENOME266145_3	211549	NA	43197.00068800572	100	high	1.93338398669323	5	DTR_833018	95.04	23.27	79.13732839417412	97.9279804503704	16	1.0
GUT_GENOME267238_1	368970	NA	45078.733881534055	100	low	26.5187364960698	3	DTR_833018	50.97	9.03	56.799804493621444	100.0	9	1.0
GUT_GENOME268063_5	127217	NA	38083.72529515853	90.0385	high	1.64646368651242	6	DTR_733507	96.83	29.15	40.20327128594325	98.04454954946517	8	1.0
GUT_GENOME270770_4	153047	NA	39522.423798118834	100	high	1.93338398669323	4	DTR_584019	96.17	23.5	54.054721970944456	100.00000000000001	9	1.0
GUT_GENOME271951_4	142386	NA	38096.665542386465	100	high	1.93338398669323	6	DTR_733507	92.69	25.85	43.878605938327524	99.60934264622516	9	1.0
GUT_GENOME272190_2	143882	NA	39551.79214411168	99.9373	high	2.28031741395258	4	DTR_770569	91.77	26.18	50.65445479877223	100.0	10	1.0
GUT_GENOME272753_6	107448	NA	38067.72650184066	100	high	2.08375028307424	6	DTR_733507	88.49	30.89	41.19171586959461	99.80542910090081	11	1.0
GUT_GENOME273313_3	212647	NA	39541.38727187533	100	low	89.1502035143453	4	DTR_770569	93.51	16.72	56.18993635312156	100.00000000000001	11	1.0
GUT_GENOME273866_10	54964	NA	54845.0	100	high	0.840573760550598	1	DTR_533996	100.0	99.88	74.78524632008606	99.99999999999999	18	1.0
GUT_GENOME283326_2	562255	NA	38091.62559623665	100	low	40.0925271279702	6	DTR_583391	93.86	6.41	43.468025324615624	99.56402167400918	9	1.0
GUT_GENOME284410_11	69164	NA	64289.0	100	high	1.49484656010795	1	DTR_581866	76.33	77.97	69.3593715784297	100.0	32	1.0
GUT_GENOME285299_3	78593	NA	38093.656552509274	96.7326	high	2.11760165935073	6	DTR_541172	97.83	42.57	41.665037288919535	98.9443623596779	9	1.0
HG796201.1	362296	NA	53200.0	93.3816	low	21.8799554709198	1	DTR_833018	41.39	7.7	68.20865278419015	98.79001758182399	12	1.0
JAAXOD010000026.1	51664	NA	49710.05665104382	100	medium	9.40952640438654	14	DTR_262187	35.82	14.41	74.86309335177025	99.99999999999999	6	1.0
JAFOOT010000081.1	29068	NA	27487.0	100	high	4.0608167082908	1	DTR_238351	58.93	39.52	45.66822593083737	90.14419018622239	10	1.0
JAFQBW010000009.1	64046	NA	62959.07897265194	100	medium	6.32612307739211	10	DTR_238535	45.24	33.44	76.89252455196359	99.60854471688096	17	1.0
JAFQXD010000016.1	110529	NA	54026.0	90.6638	medium	5.36852754066194	1	DTR_239838	50.4	19.58	46.42913839336593	100.0	9	1.0
JAFQXD010000029.1	59401	NA	53200.0	100	high	4.23688380255924	1	DTR_833018	38.64	45.65	61.63332110993427	100.00000000000001	11	1.1
JAFRFB010000003.1	98209	NA	53200.0	100	medium	6.55313837375178	1	DTR_833018	39.77	25.39	85.87489041235362	100.00000000000003	14	1.0
JAFRFB010000013.1	188178	NA	54025.99999999999	91.9206	low	22.9413956459254	1	DTR_239838	45.75	10.71	52.40098893256807	99.99999999999999	10	1.0
JAFRFB010000031.1	12730	NA	11772.715544588142	100	medium	7.17902053223105	4	DTR_379640	50.13	47.62	42.37449221846713	91.29838165991501	5	1.0
JAFRFD010000004.1	100949	NA	39022.83299997419	100	low	10.277080385265	10	DTR_250645	37.63	17.65	51.5540342360943	99.84253781295884	11	1.0
JAFRFD010000049.1	40887	NA	39979.632740945344	100	high	2.41663049759609	6	DTR_238561	69.21	37.55	60.814100447496415	90.3158155489812	12	1.0
JAFRFD010000055.1	13905	NA	11735.046935721304	100	medium	7.52860853030347	4	DTR_379640	43.28	46.52	69.20070698273794	83.76097371040812	5	1.0
JAFRFD010000119.1	13695	NA	11939.235945244567	100	low	10.1448366309843	5	DTR_379640	39.09	36.14	45.92584766130404	98.63062877836886	4	1.0
JAFRKE010000025.1	65193	NA	39022.83299997419	98.7883	medium	6.55313837375178	10	DTR_250645	37.63	27.44	48.641489680912294	99.07442109161465	11	1.0
JAFRKE010000032.1	47128	NA	43988.0	100	medium	8.21957329009429	1	DTR_356050	48.24	37.72	56.3579652071607	78.04143067494572	9	1.0
JAFRKG010000185.1	40886	NA	39982.4708944475	100	high	2.18777473499126	6	DTR_238561	69.3	36.94	60.233008357017304	90.41313076928327	13	1.0
JAFRMD010000120.1	158079	NA	51197.96135960301	100	low	13.0153246546824	2	DTR_833018	39.99	15.44	97.09876423942143	100.0	16	1.0
JAFRSC010000016.1	121073	NA	51051.44071735466	100	low	13.0153246546824	2	DTR_833018	38.77	13.71	47.24117025893955	92.19319287207192	12	1.0
JAFSLI010000012.1	31541	NA	34637.23574650945	91.061	high	4.0636725851998	61	DTR_757460	61.89	47.21	53.10959500573499	98.41084985044017	14	1.0
JAFSLI010000029.1	46740	NA	44605.0	100	high	2.00123399480206	1	DTR_180465	67.29	68.96	70.95911256972485	100.00000000000001	16	1.17
JAFUBV010000001.1	130604	NA	53200.0	100	medium	5.12360649723847	1	DTR_833018	47.05	41.55	95.7765052241754	100.00000000000001	11	1.8
JAFUHT010000036.1	52132	NA	54026.0	96.4943	high	1.48335936798253	1	DTR_239838	93.59	90.61	63.97403657381419	79.23515979557084	6	1.0
JAFWHL010000394.1	45026	NA	49738.54098760399	90.5254	medium	7.90783469262388	5	DTR_301665	48.08	51.89	74.52527938416833	100.0	9	1.0
JAFXOA010000200.1	37594	NA	38449.2496630296	97.7756	low	22.9413956459254	6	DTR_453008	43.31	11.6	48.73388733058513	99.57660907199357	11	1.0
JAFYFD010000228.1	40604	NA	38752.82591312587	100	high	3.3811723832475	36	DTR_218010	54.2	19.44	53.246986982219205	99.24818261594274	13	1.0
JAGCAI010000009.1	14645	NA	13656.09825564467	100	low	12.5453716678203	2	DTR_456042	30.67	30.51	49.116870555450326	99.68411847423727	4	1.0
JAGCAI010000019.1	14332	NA	13619.022344808327	100	medium	8.42881601475043	2	DTR_446472	36.13	47.97	43.71512579208131	88.86620755042516	6	1.0
JAGCAI010000056.1	14938	NA	11731.76881365581	100	medium	7.52860853030347	4	DTR_379640	44.62	43.87	74.34207593368959	88.71496731794143	5	1.0
JAGCAI010000078.1	22666	NA	22339.05595839212	100	medium	8.19045947082916	18	GCA_003655805.1	38.02	29.73	57.78303679825032	87.92448755793731	10	1.0
JAGCAI010000106.1	33771	NA	34623.82404429569	97.5369	medium	8.34098931386297	99	DTR_246331	47.16	28.42	74.85753535183744	99.78902552839479	18	1.0
JAGCAI010000113.1	1909	NA	NA	NA	NA	NA	0	NA	NA	NA	NA	NA	0	1.0
JAGCAI010000135.1	14062	NA	11496.874970893434	100	low	11.4453806865935	3	GCA_002956055.1	33.82	33.4	47.157525531580184	99.03747095291145	4	1.0
JAGCAI010000136.1	13463	NA	13539.93915186398	99.4318	low	17.7188662440404	7	DTR_456042	31.7	26.58	45.14983433768786	98.37428513180748	4	1.0
JAGCAI010000179.1	18859	NA	18681.139567354006	100	medium	8.34098931386297	3	GCA_003655805.1	42.53	29.26	58.696468369662966	95.92483833337069	7	1.0
JAGCAI010000203.1	32292	NA	34587.141166100824	93.3642	medium	8.26190467220944	101	DTR_292802	47.18	25.56	75.07978762731608	99.71527398669211	17	1.0
JAGCAI010000221.1	57371	NA	59206.6447124336	96.8996	medium	7.28870551160637	318	DTR_600742	42.75	24.9	76.06276151605006	100.0	15	1.0
JAGCAI010000243.1	14652	NA	11729.16146562533	100	medium	7.52860853030347	4	GCA_003865595.1	43.9	45.43	72.91962429750066	87.34590052224621	5	1.0
JAGCAI010000249.1	38821	NA	39760.15283180664	97.638	high	2.56477021221195	4	DTR_351505	73.33	61.75	59.78759381605057	88.57575634965927	10	1.0
JAGCAI010000255.1	45356	NA	44635.759570395465	100	high	4.64752998365506	4	DTR_819265	52.52	39.81	54.431631963891085	100.00000000000003	21	1.0
JAGCAI010000256.1	14002	NA	11678.18766922722	100	medium	6.89081578481685	4	GCA_002956055.1	43.03	47.65	66.35818644908905	81.88195211704421	7	1.0
JAGCAI010000297.1	14392	NA	12289.402913593176	100	low	22.555739773824	4	DTR_456042	29.14	19.99	48.14139551569507	99.25209865470853	3	1.0
JAGCAI010000306.1	14221	NA	11727.538743122523	100	medium	7.52860853030347	4	DTR_379640	43.14	45.43	70.7786497121682	85.27384690637403	5	1.0
JAGCAI010000334.1	44143	NA	41466.0	100	high	3.01214445509748	1	DTR_351958	66.07	55.21	59.51849181999982	99.35586267003443	17	1.0
JAGCAI010000340.1	18039	NA	19017.692795200037	94.8538	medium	7.15095474400731	6	GCA_003655805.1	37.65	45.16	57.16716906222421	96.75098542548022	7	1.0
JAGCAI010000367.1	12978	NA	13573.591329635132	95.6121	low	11.345462708111	7	DTR_456042	34.7	30.56	64.59334038361791	79.13259494183697	5	1.0
JAGCAI010000380.1	14252	NA	11814.897986944758	100	medium	9.14234112693525	4	GCA_002956055.1	42.65	27.77	40.813815512928095	86.17749670153371	5	1.0
JAGCAI010000391.1	13202	NA	13602.507100879156	97.0556	medium	7.46177901320361	2	DTR_446472	28.72	47.73	39.87151720867495	90.48659558963031	5	1.0
JAGCAI010000403.1	13257	NA	11791.969640665639	100	medium	7.52860853030347	4	GCA_002956055.1	43.81	44.68	61.51445965293762	77.96445192889432	8	1.0
JAGCAI010000448.1	22287	NA	18996.988251958977	100	medium	7.42318358164892	6	GCA_003655805.1	38.95	34.02	68.37935569686229	95.54741389408895	9	1.0
JAGCAI010000449.1	13664	NA	13889.0	98.38	low	11.8293142109682	1	DTR_456042	30.84	38.17	66.07887260062364	79.8937368289557	5	1.0
JAGCAI010000465.1	13028	NA	12961.315179316094	100	low	20.455764075067	7	GCA_002956055.1	27.0	34.15	43.69281869287299	97.1989790450017	4	1.0
JAGCAI010000468.1	13288	NA	10945.000000000002	100	low	25.5595308871383	1	DTR_379640	31.9	16.42	38.98323232323232	95.04444444444442	2	1.0
JAGCAI010000489.1	36955	NA	35934.0	100	high	2.09128952692404	1	DTR_357454	67.98	63.79	44.536700264553396	99.36657140085825	5	1.0
JAGCAI010000496.1	14260	NA	11733.437692421794	100	medium	8.54613302114583	4	DTR_379640	46.25	40.67	42.350523851117536	90.8866693576011	5	1.0
JAGCAI010000500.1	43857	NA	39630.116895848994	100	medium	7.00366091186278	4	DTR_460093	53.8	43.56	56.62337535452112	95.87119882064421	23	1.0
JAGCAI010000502.1	55354	NA	52977.374164335866	100	high	2.36423190304618	4	DTR_353274	87.61	76.19	73.17443040662263	99.54462256504188	30	1.0
JAGCAI010000516.1	38001	NA	35172.21416422093	100	low	13.7450815046115	14	DTR_242290	44.44	16.65	46.6187460424976	99.46448966968067	5	1.0
JAGCAI010000531.1	30012	NA	27487.0	100	high	3.39357354648824	1	DTR_238351	59.4	59.42	40.83369500669522	89.55668010210846	13	1.0
JAGCAI010000542.1	12557	NA	11776.445322123573	100	medium	6.89081578481685	4	GCA_003865595.1	45.56	49.46	38.606666365931304	89.3893221135912	5	1.0
JAGCAI010000548.1	14514	NA	11769.152582506496	100	medium	8.54613302114583	4	DTR_379640	46.09	40.66	48.67551772362005	99.53858143618952	4	1.0
JAGCAI010000556.1	42190	NA	44291.45231932895	95.2554	medium	5.03187134672658	11	DTR_875999	43.08	45.24	45.583207690462125	99.72691375627441	19	1.0
JAGCAI010000558.1	34989	NA	37451.2175686299	93.4255	medium	6.39987964495261	21	DTR_428477	52.2	44.07	54.983235942813984	98.54534259285403	14	1.0
JAGCAI010000559.1	36385	NA	36862.48461120264	98.7047	high	2.64730500457439	3	DTR_352947	63.4	62.68	50.80142400281145	99.99999999999999	6	1.0
JAGCAQ010000001.1	14006	NA	13676.218968448895	100	low	11.2846398807507	2	DTR_456042	33.44	40.55	64.60507466541999	80.11100035436294	8	1.0
JAGCAQ010000005.1	74764	NA	40550.29026287969	100	medium	7.77568987716185	79	DTR_351515	48.45	16.2	90.6304860520075	99.99999999999999	14	1.89
JAGCAQ010000010.1	53147	NA	46578.2412868431	100	low	12.2561147132961	171	DTR_681462	42.72	17.95	68.71959938926726	99.99999999999997	14	1.46
JAGCAQ010000012.1	34214	NA	30498.54582682846	100	medium	8.41034336583298	24	DTR_591241	46.21	41.69	66.53655493279537	98.41991890098477	6	1.0
JAGCAQ010000013.1	61385	NA	34144.777810823325	100	medium	9.40952640438654	99	DTR_330268	34.93	16.89	88.83327674451303	100.0	15	1.8
JAGCAQ010000016.1	18208	NA	20142.863683953015	90.3943	medium	7.03193258363631	8	GCA_000858305.1	34.28	46.68	54.33571576481513	93.46096811872142	10	1.0
JAGCAQ010000059.1	13739	NA	11765.087191845398	100	medium	8.54613302114583	4	DTR_379640	46.51	40.44	46.07351654857341	98.68024367770333	4	1.0
JAGCAQ010000120.1	38339	NA	39103.450097923924	98.0451	low	28.6097154000585	34	DTR_621873	22.8	9.14	35.563867704280156	100.0	2	1.0
JAGCAQ010000136.1	15261	NA	11474.489461124524	100	medium	7.60123977440171	3	DTR_379640	43.1	44.34	75.95602071279477	90.19627718305287	5	1.0
JAGCAQ010000211.1	13541	NA	13646.238216287404	99.2288	medium	8.63432559025156	2	DTR_456042	37.02	45.81	45.41517211222658	98.46028429065387	4	1.0
JAGCAQ010000242.1	55725	NA	53723.95073227014	100	high	4.29143910316024	283	DTR_770758	53.76	14.64	65.7475039969951	100.0	17	1.0
JAGCAQ010000284.1	13891	NA	12827.792160705538	100	low	25.5595308871383	2	GCA_003658425.1	27.6	17.45	71.42803912435957	82.63034932463903	3	1.0
JAGCAQ010000380.1	96853	NA	104170.0	92.9759	medium	5.03187134672658	1	DTR_347303	44.87	44.44	91.76298586437781	100.00000000000001	20	1.0
JAGCAQ010000384.1	14873	NA	13888.999999999998	100	low	12.6657909233442	1	DTR_456042	28.47	33.35	75.03117185362404	87.91065547984589	4	1.0
JAGCAQ010000438.1	12844	NA	11769.338632829946	100	medium	7.52860853030347	4	DTR_379640	45.07	44.96	43.07483765414461	96.39839932964553	4	1.0
JAGCAQ010000450.1	13081	NA	12874.126937555513	100	low	12.6657909233442	7	GCA_003865595.1	30.56	34.64	43.86717992018672	97.42823138145032	4	1.0
JAGCAQ010000454.1	13035	NA	14426.15377446412	90.3567	low	17.7188662440404	2	DTR_446472	28.36	26.03	46.88707692307693	98.93723076923078	2	1.0
JAGCAQ010000562.1	13760	NA	14061.962206507575	97.8526	low	25.5595308871383	2	DTR_729125	29.2	16.79	40.706504065040654	96.49430894308942	2	1.0
JAGCAQ010000566.1	13789	NA	11793.204914483655	100	low	15.7472323702244	4	DTR_379640	38.88	17.77	44.024546878081736	92.90993678823513	4	1.0
JAGCAQ010000570.1	38329	NA	39103.450097923924	98.0195	low	28.6097154000585	34	DTR_621873	22.8	9.14	35.557626459143975	100.0	2	1.0
JAGCAQ010000572.1	13720	NA	14061.962206507575	97.5682	low	25.5595308871383	2	DTR_729125	29.2	16.7	40.58439024390243	96.37357723577234	2	1.0
JAGCAQ010000574.1	13048	NA	12874.126937555513	100	low	12.6657909233442	7	GCA_003865595.1	30.56	34.63	43.75951103291736	97.28474194242271	4	1.0
JAGCBE010000014.1	18354	NA	18695.126739985273	98.1753	medium	8.19045947082916	3	GCA_003655805.1	41.83	30.49	61.77420648552389	100.0	6	1.0
JAGCBE010000063.1	13388	NA	13682.794826048172	97.8455	low	17.7188662440404	7	DTR_456042	31.62	26.89	65.91416408322145	80.07214189501909	5	1.0
JAGCBE010000086.1	13776	NA	11781.659505780304	100	medium	7.66980794452869	4	DTR_379640	47.87	42.76	46.19916820824652	98.72158942714871	4	1.0
JAGCBE010000116.1	14625	NA	11927.68867822136	100	low	13.3435582822086	5	DTR_379640	34.22	26.2	49.045894008225325	99.66096485454784	4	1.0
JAGCBE010000182.1	45064	NA	43969.47990802456	100	medium	7.55870278412634	33	DTR_368860	32.65	18.27	50.99778457201757	97.77345739852386	20	1.0
JAGCBE010000205.1	90330	NA	93290.54878503639	96.8265	high	3.25168519939991	54	DTR_883152	48.53	78.25	58.30770269130609	99.82567128669396	6	1.0
JAGCBE010000206.1	12756	NA	11743.92893221909	100	medium	7.52860853030347	4	GCA_003865595.1	43.88	46.03	39.3207409557692	89.84292573939804	5	1.0
JAGCBE010000233.1	14409	NA	11728.805800327847	100	medium	7.52860853030347	4	DTR_379640	44.4	43.63	71.71094584287744	86.17638834755171	5	1.0
JAGCBE010000284.1	15265	NA	16339.261462375933	93.4253	low	21.1704738531244	2	GCA_900093805.1	26.6	15.69	41.563828592236064	87.68318144002944	5	1.0
JAGCBE010000341.1	42045	NA	42013.4320869822	100	high	2.09128952692404	4	DTR_355728	69.17	65.39	53.71948772848024	99.47556203164031	3	1.0
JAGCBE010000350.1	45754	NA	48887.983673876064	93.5895	medium	5.03187134672658	6	DTR_351952	46.75	45.58	79.21158294458478	100.0	7	1.0
JAGCBE010000360.1	39504	NA	34319.204377173905	100	high	3.9130180855413	2	DTR_345131	62.61	61.22	47.19956115551478	84.88843044282625	6	1.0
JAGCBE010000364.1	43853	NA	44308.14809593634	98.9728	medium	5.56649030667154	6	DTR_882546	45.5	51.28	46.213625374411095	98.23423326774639	8	1.0
JAGCBE010000412.1	56964	NA	53556.985093024785	100	high	4.00080860450321	9	DTR_533996	55.14	70.69	75.66202480536721	100.00000000000003	20	1.0
JAGCBE010000473.1	35117	NA	36853.61451588709	95.2878	medium	5.65215079491679	3	DTR_352950	53.37	57.51	45.78440859427919	94.79534496722668	7	1.0
JAGCBE010000476.1	43233	NA	41185.499398927444	100	medium	5.54305193017369	4	DTR_732893	41.53	37.52	47.80845464146294	100.00000000000004	23	1.0
JAGCBE010000489.1	12273	NA	11738.376201054676	100	medium	7.52860853030347	4	DTR_379640	43.92	46.54	40.8533271204844	89.19300386572868	5	1.0
JAGCBE010000528.1	53090	NA	49062.27535845841	100	low	13.0153246546824	91	DTR_245314	39.39	16.41	80.27179121693297	99.5483891121087	32	1.0
JAGCBE010000542.1	143933	NA	156259.06155558533	92.1118	low	13.7450815046115	11	DTR_245613	44.95	17.31	81.22970735588419	95.36956589906312	19	1.0
JAGCLR010000143.1	62397	NA	42669.91293488108	100	low	21.8799554709198	14	DTR_225612	42.4	8.6	61.51388712693603	99.99999999999999	8	1.0
JAGCLR010000236.1	40904	NA	41376.25446528159	98.8586	high	3.74217533944229	2	DTR_471280	34.04	50.65	79.1240440955223	99.99999999999999	12	1.0
JAGCLR010000246.1	18921	NA	19101.236588258853	99.0564	medium	8.19045947082916	6	GCA_003655805.1	41.75	29.99	58.58330322485206	93.83685763856153	7	1.0
JAGCLR010000363.1	154509	NA	88673.34668280305	100	medium	9.40952640438654	147	DTR_243190	35.9	15.18	68.84404412315143	94.23684972889687	21	1.0
JAGGKR010000001.1	2380242	NA	853960.5140882278	100	low	33.4305729197674	16	GCA_004156295.1	31.69	1.27	100.0	100.0	3	1.0
JAGGLK010000002.1	690823	NA	714996.6608852339	96.6191	low	33.4305729197674	18	GCA_000889395.1	29.83	2.32	100.0	100.0	8	1.0
JAHDSG010000174.1	38906	NA	38777.292224963174	100	high	2.16960882492098	2	DTR_299244	63.37	24.53	49.518371839359524	95.65013815671324	7	1.0
KK211376.1	317697	NA	38219.0	100	medium	7.72751045458802	1	DTR_250645	66.17	11.66	100.0	100.0	9	1.0
LFRP01000014.1	179681	NA	73313.0	100	low	21.8799554709198	1	DTR_267120	40.02	9.66	99.26172934988112	100.00000000000001	6	1.0
LNGC01000001.1	54809	NA	36671.224020957176	100	low	17.7366586216144	11	GCA_000840645.2	36.07	9.41	67.17264898598609	83.46563587646327	7	1.0
LWMS01000031.1	191110	NA	42465.48994206494	100	medium	9.62499348009988	7	DTR_241949	30.91	13.58	76.33912698573391	99.99999999999999	12	1.0
MVJK01000002.1	83528	NA	57079.660939876354	94.5748	low	34.0128276133136	7	DTR_852498	48.19	2.28	57.401535424928596	100.00000000000001	7	1.0
OMSG01000001.1	409734	NA	377588.0712265011	100	high	4.39701194829575	3	DTR_352881	50.67	24.91	99.42325523051996	100.00000000000006	55	1.0
OMYG01000006.1	193891	NA	83609.87843881248	100	low	34.0128276133136	7	GCA_002633645.1	49.05	2.12	100.00000000000001	100.00000000000001	2	1.0
ONIK01000016.1	62101	NA	39172.56293595219	95.5822	medium	6.94328358208955	13	DTR_507185	39.64	27.88	47.928468643837476	99.4728342934473	9	1.0
ONQF01000013.1	40532	NA	38942.0	100	high	1.49134182622626	1	DTR_170268	91.87	90.74	66.12441426623133	100.0	10	1.0
Pig88_SpadScaf_Metabat_bin21_35779_22	35779	NA	38192.164638683316	93.6815	medium	6.85704348576821	9	DTR_599705	52.78	37.27	46.32417448982304	99.41630337104783	8	1.0
RWII01000001.1	56475	NA	56376.0	100	high	0.840573760550598	1	DTR_302215	100.0	100.0	69.04098324351692	100.00000000000001	10	1.0
SFKZ01000005.1	85521	NA	71494.9095138632	100	medium	9.40952640438654	6	DTR_381776	34.4	14.74	64.67802536659177	96.69174188175185	21	1.0
SFKZ01000014.1	41354	NA	41886.76829182709	98.7281	medium	8.84651380439869	19	DTR_541113	47.88	57.97	70.53951494537353	100.0	7	1.0
SRR11880836_SpadScaf_Metabat_bin42_37880_153	37880	NA	38021.84836467996	99.6269	high	1.86282637844034	3	DTR_881954	93.25	83.86	52.97948104425871	99.72579759402964	12	1.0
SUTI01000003.1	145233	NA	39879.66269533725	100	medium	9.40952640438654	6	DTR_250645	36.38	15.47	49.48611524344318	100.0	9	1.0
3300005326.a:Ga0074195_1000350	97988	NA	62479.36400608268	100	high	4.39701194829575	2	DTR_042867	48.61	23.76	69.30815530190189	100.00000000000003	11	1.0
3300010263.a:Ga0134105_1000027	174471	NA	73313.0	100	low	21.8799554709198	1	DTR_267120	40.02	10.07	98.89393633509464	100.00000000000001	6	1.0
3300010269.a:Ga0134102_1000021	191847	NA	73313.0	100	low	21.8799554709198	1	DTR_267120	40.02	9.16	100.00000000000001	100.00000000000001	6	1.0
3300013137.a:Ga0172375_10000208	92375	NA	94773.55107118495	97.4692	low	33.4305729197674	28	DTR_358113	30.27	4.75	95.43070806315716	100.00000000000001	5	1.0
3300017522.a:Ga0185323_1000275	81980	NA	29507.815184678522	100	low	32.0045732680983	7	DTR_643034	55.23	3.49	83.74838662377114	92.39934271308697	7	1.0
3300021541.a:Ga0214529_10004	219700	NA	38741.321502863	100	low	13.0153246546824	13	DTR_770569	37.87	15.34	77.75187651053132	100.00000000000001	10	1.37
3300025408.a:Ga0208462_1000568	35319	NA	34243.68626626524	100	medium	8.86629837842375	2	DTR_706090	50.83	34.42	44.87070637683315	99.36164897436446	5	1.0
3300025587.a:Ga0208938_1000004	390363	NA	31007.0	100	low	36.2703068873326	1	GCA_000840645.2	84.26	6.08	100.0	100.0	8	1.0
3300025618.a:Ga0208693_1000011	198520	NA	73313.0	100	low	35.9439843853632	1	DTR_267120	38.64	6.48	100.00000000000001	100.00000000000001	4	1.0
3300025657.a:Ga0208823_1000010	205358	NA	73313.0	100	low	35.9439843853632	1	DTR_267120	38.64	6.24	100.00000000000001	100.00000000000001	4	1.0
3300025706.a:Ga0209507_1000560	39271	NA	39144.0	100	high	0.840573760550598	1	DTR_286486	100.0	100.0	59.31214270449335	96.7371520752023	8	1.0
3300025952.a:Ga0210077_1000102	43749	NA	42952.0	100	high	1.47004180213655	1	DTR_108742	73.98	83.07	82.24588929880917	99.99999999999997	18	1.0
3300025952.a:Ga0210077_1000114	40600	NA	42952.0	94.5241	medium	7.73079019073569	1	DTR_108742	52.78	51.26	78.4872440551831	99.99999999999997	15	1.0
3300027419.a:Ga0209340_1000177	85945	NA	15339.02550248038	100	low	26.5187364960698	3	DTR_126028	49.99	7.82	29.557172030251472	62.287800567272086	6	1.0
3300027958.a:Ga0209749_1000001	2090433	NA	779312.2544418745	100	low	34.9257320695997	18	GCA_002956935.1	33.28	1.65	100.0	100.0	1	1.0
3300028570.a:Ga0255341_1000033	266875	NA	223686.42886644191	100	low	34.9257320695997	88	DTR_099033	37.0	3.11	NA	NA	0	1.0
3300028582.a:Ga0268360_1000001	913424	NA	37469.11850895619	100	low	34.5701557787554	5	DTR_642791	43.92	2.25	100.00000000000001	100.00000000000001	9	1.0
3300028593.a:Ga0255347_1000019	364320	NA	363301.5752345755	100	low	34.9257320695997	24	DTR_099033	36.47	2.88	NA	NA	0	1.0
3300028601.a:Ga0265295_1000380	90697	NA	59766.75465257544	100	low	34.0128276133136	13	DTR_267120	47.63	5.74	96.04685252101199	100.00000000000001	6	1.0
3300028601.a:Ga0265295_1000489	79600	NA	88205.25798487377	90.2441	low	10.277080385265	8	DTR_182849	41.74	20.29	67.15678081242041	98.73410963802749	16	1.0
3300029798.a:Ga0239581_1000090	82476	NA	29507.815184678522	100	low	32.0045732680983	7	DTR_643034	55.23	3.44	50.1518098405238	90.37512281640845	7	1.0
D4998_C1112_H3_Bin_114__59665	57972	NA	52201.0	100	medium	9.62499348009988	1	DTR_024240	27.81	14.81	64.23245566331029	90.82739206287104	8	1.0
DEEP_DOM17A_MAG_00061_000000000085	46279	NA	38465.0	100	medium	7.28870551160637	1	GCA_003004805.1	43.58	24.21	56.56459884236361	94.38253716469217	5	1.0
G35_3_bin.39NODE_74	186431	NA	15166.15272596374	100	low	32.6468103084073	3	DTR_124348	80.73	3.24	93.47929057442461	100.00000000000001	6	1.0
JAHKLT010000048.1	38531	NA	38061.45077653048	100	medium	7.23120837297812	6	DTR_537163	48.26	42.83	46.81642216724517	96.43726494343844	8	1.0
JAHYJJ010000001.1	45781	NA	34726.0	100	high	2.3383008728132	1	DTR_248304	61.99	29.77	48.759742629257616	92.51645713902435	6	1.0
Meg22_1618_Bin_161__1561	60056	NA	56899.209014611515	100	low	26.0831970943911	88	DTR_201503	31.86	8.13	61.39831224060114	100.0	9	1.0
Meg22_810_Bin_19__396	75279	NA	72596.24821888121	100	medium	5.36852754066194	10	DTR_200452	51.08	18.73	63.606374293192786	97.87681855412868	19	1.0
S7_bin36_000000000016	50421	NA	55663.740163379516	90.5814	low	17.7366586216144	17	DTR_267120	37.22	8.21	72.04257670468724	84.21701457250448	8	1.0
wang_Ca_Santabarbaracales_ICDLI-WYZ69_4634604	39594	NA	41482.0	95.4486	low	10.277080385265	1	DTR_587507	41.72	20.02	52.812004139183664	99.82862539656477	9	1.0

## Sheet: TableS4-list-of-MGEs
local id	MGE_contig	commom name	Sequence reference	MGE type	MCP type	CRISPR_hits	Host order	Host taxonomy	Host	type	length	DGR elements	Ig-like domains	proteins with Ig-like domains	env
vir003	146_SpadScaf_Metabat2_bin41_76858_4@12000-55000		this study	virus	HK97	1	Methanomassiliicoccales	Archaea; Candidatus Thermoplasmatota; Thermoplasmata; Methanomassiliicoccales	Methanomassiliicoccales	provirus	43000	yes	6	1	gut
vir005	163_Spad_Metabat_bin123_46136_23@28100-46136		this study	virus	DJR	3	Methanomicrobiales	Archaea;Euryarchaeota;Methanomicrobia;Methanomicrobiales	Methanomicrobiales	provirus	18037		0	0	gut
vir006	163_SpadScaf_Metabat2_bin157_47041_7@9000-42000		this study	virus	HK97	0	Methanomassiliicoccales	Archaea; Candidatus Thermoplasmatota; Thermoplasmata; Methanomassiliicoccales	Methanomassiliicoccales	provirus	33000	yes	7	1	gut
vir007	206_SpadScaf_Metabat2_bin243_182810_0@59597-79030		this study	virus	DJR	0	Methanomicrobiales	Archaea;Euryarchaeota;Methanomicrobia;Methanomicrobiales	Methanomicrobiales	provirus	19433	yes	4	1	gut
vir010	49_SpadScaf_Metabat2_bin94_100125_4@8555-49374		this study	virus	HK97	1	Methanomicrobiales	Archaea;Euryarchaeota;Methanomicrobia;Methanomicrobiales	Methanomicrobiales	provirus	40819		0	0	gut
vir011	49_SpadScaf_Metabat2_bin94_44389_15@127-33921		this study	virus	HK97	1	Methanomicrobiales	Archaea;Euryarchaeota;Methanomicrobia;Methanomicrobiales	Methanomicrobiales	provirus	33794		13	3	gut
vir013	59_SpadScaf_Metabat_bin84_128708_14@27011-86086		this study	virus	HK97	154	Methanobacteriales	Archaea; Euryarchaeota; Methanomada group; Methanobacteria; Methanobacteriales; Methanobacteriaceae; Methanobrevibacter	Methanobrevibacter smithii	provirus (complete)	59075		7	3	gut
vir014	AE010299.1@4680690-4726820	Mace-Pro1	GenBank	virus	HK97	0	Methanosarcinales	Archaea; Euryarchaeota; Stenosarchaea group; Methanomicrobia; Methanosarcinales; Methanosarcinaceae; Methanosarcina	Methanosarcina acetivorans	provirus (complete)	46131		2	1	non-gut
vir015	AELT01000015.1@95198-135571		GenBank	virus	HK97	265	Methanobacteriales	Archaea; Euryarchaeota; Methanomada group; Methanobacteria; Methanobacteriales; Methanobacteriaceae; Methanobrevibacter	Methanobrevibacter smithii	provirus (complete)	40374		11	3	gut
vir016	AF145236.1		GenBank	plasmid	no	3	Methanobacteriales	Archaea; Euryarchaeota; Methanomada group; Methanobacteria; Methanobacteriales; Methanobacteriaceae; Methanobacterium	Methanobacterium	extrachromosomal	6205		0	0	non-gut
vir018	AM19_Spad_Metabat2_bin53_101312_1@23520-44086		this study	virus	DJR	4	Methanomicrobiales	Archaea;Euryarchaeota;Methanomicrobia;Methanomicrobiales	Methanomicrobiales	provirus	20567		0	0	gut
vir019	AM19_Spad_Metabat2_bin53_52369_7@2763-29433		this study	virus	DJR	1	Methanomicrobiales	Archaea;Euryarchaeota;Methanomicrobia;Methanomicrobiales	Methanomicrobiales	provirus	26671	yes	4	2	gut
vir020	AP011527.1		GenBank	plasmid	no	3	Methanococcales	Archaea; Euryarchaeota; Methanomada group; Methanococci; Methanococcales; Methanococcaceae; Methanococcus	Methanococcus	extrachromosomal	12084		0	0	non-gut
vir021	AP011953.1		GenBank	plasmid	no	1	Methanobacteriales	Archaea; Euryarchaeota; Methanomada group; Methanobacteria; Methanobacteriales; Methanobacteriaceae; Methanothermobacter	Methanothermobacter	extrachromosomal	11015		4	1	non-gut
vir023	AY523658.1		GenBank	plasmid	no	0	Methanosarcinales	Archaea; Euryarchaeota; Stenosarchaea group; Methanomicrobia; Methanosarcinales; Methanosarcinaceae; Methanohalophilus	Methanohalophilus	extrachromosomal	2158		0	0	non-gut
vir024	BCNW01000001.1@382673-399038		GenBank	virus	DJR	4	Methanomicrobiales	Archaea; Euryarchaeota; Stenosarchaea group; Methanomicrobia; Methanomicrobiales; Methanomicrobiaceae; Methanofollis	Methanofollis ethanolicus strain JCM 15103	provirus	16366		5	2	non-gut
vir025	CAAGSW010000005.1@72527-111632		GenBank	virus	HK97	0	Methanosarcinales	Archaea; Euryarchaeota; Stenosarchaea group; Methanomicrobia; Methanosarcinales; Methanosarcinaceae; Methanococcoides	Methanococcoides sp.	provirus	39106		1	1	non-gut
vir027	CACVVD010000002.1		10.1038/s41587-019-0202-3	virus	HK97	0	Methanobacteriales	Archaea; Euryarchaeota; Methanomada group; Methanobacteria; Methanobacteriales; Methanobacteriaceae; Methanobrevibacter	Methanobrevibacter	extrachromosomal	46349		4	1	gut
vir029	CAIOKB010000183.1@1-73650		10.1038/s41597-021-00910-1	virus	HK97	0	Methanomicrobiales	Archaea; Euryarchaeota; Stenosarchaea group; Methanomicrobia; Methanomicrobiales; Methanoregulaceae	Methanoregulaceae	extrachromosomal	73650		1	1	non-gut
vir033	CAIYHQ010000098.1		GenBank	plasmid	no	0	Methanosarcinales	Archaea; Euryarchaeota; Stenosarchaea group; Methanomicrobia; Methanomicrobiales; Methanospirillaceae	Methanospirillaceae	extrachromosomal	11703		5	1	non-gut
vir034	CAJKRY010000008.1@50000-84750		GenBank	virus	HK97	1	Methanomassiliicoccales	Archaea; Candidatus Thermoplasmatota; Thermoplasmata; Methanomassiliicoccales; Methanomassiliicoccaceae; Methanomassiliicoccus	Methanomassiliicoccus	provirus (incomplete)	34751	yes	10	3	gut
vir035	CAJMKC010000016.1		GenBank	plasmid	no	0	Methanobacteriales	Archaea; Euryarchaeota; Methanomada group; Methanobacteria; Methanobacteriales; Methanobacteriaceae; Methanobrevibacter	Methanobrevibacter	extrachromosomal	25402		0	0	gut
vir036	CP000610.1		GenBank	plasmid	no	0	Methanococcales	Archaea; Euryarchaeota; Methanomada group; Methanococci; Methanococcales; Methanococcaceae; Methanococcus	Methanococcus	extrachromosomal	8285		0	0	non-gut
vir037	CP000678.1@1693223-1732061	Msmi-Pro1	GenBank	virus	HK97	137	Methanobacteriales	Archaea; Euryarchaeota; Methanomada group; Methanobacteria; Methanobacteriales; Methanobacteriaceae; Methanobrevibacter	Methanobrevibacter smithii	provirus (complete)	38839		2	1	gut
vir038	CP001696.1@1449341-1480595		GenBank	virus	HK97	0	Methanococcales	Archaea; Euryarchaeota; Methanomada group; Methanococci; Methanococcales; Methanocaldococcaceae; Methanocaldococcus	Methanocaldococcus	provirus	31255		0	0	non-gut
vir039	CP001697.1		GenBank	plasmid	no	3	Methanococcales	Archaea; Euryarchaeota; Methanomada group; Methanococci; Methanococcales; Methanocaldococcaceae; Methanocaldococcus	Methanocaldococcus	extrachromosomal	22190		3	1	non-gut
vir041	CP001719.1@404213-454360	Phi-mru1	GenBank	virus	HK97	0	Methanobacteriales	Archaea; Euryarchaeota; Methanomada group; Methanobacteria; Methanobacteriales; Methanobacteriaceae; Methanobrevibacter	Methanobrevibacter ruminantium	provirus (complete)	50148		16	4	gut
vir042	CP001787.1@527865-558038	Mvul-Pro1	GenBank	virus	HK97	4	Methanococcales	Archaea; Euryarchaeota; Methanomada group; Methanococci; Methanococcales; Methanocaldococcaceae; Methanocaldococcus	Methanocaldococcus	provirus	30174		8	2	non-gut
vir043	CP001788.1		GenBank	plasmid	no	0	Methanococcales	Archaea; Euryarchaeota; Methanomada group; Methanococci; Methanococcales; Methanocaldococcaceae; Methanocaldococcus	Methanocaldococcus	extrachromosomal	10704		0	0	non-gut
vir044	CP001789.1		GenBank	plasmid	no	0	Methanococcales	Archaea; Euryarchaeota; Methanomada group; Methanococci; Methanococcales; Methanocaldococcaceae; Methanocaldococcus	Methanocaldococcus	extrachromosomal	4704		0	0	non-gut
vir045	CP001902.1		GenBank	plasmid	no	8	Methanococcales	Archaea; Euryarchaeota; Methanomada group; Methanococci; Methanococcales; Methanocaldococcaceae; Methanocaldococcus	Methanocaldococcus	extrachromosomal	12197		0	0	non-gut
vir046	CP002057.1@479467-491574		GenBank	virus	DJR	4	Methanococcales	Archaea; Euryarchaeota; Methanomada group; Methanococci; Methanococcales; Methanococcaceae; Methanococcus	Methanococcus voltae	provirus	12108		0	0	non-gut
vir047	CP002070.1		GenBank	plasmid	no	0	Methanosarcinales	Archaea; Euryarchaeota; Stenosarchaea group; Methanomicrobia; Methanosarcinales; Methanosarcinaceae; Methanohalobium	Methanohalobium	extrachromosomal	163915		81	12	non-gut
vir048	CP002117.1@2310132-2328599		GenBank	virus	DJR	2	Methanomicrobiales	Archaea; Euryarchaeota; Stenosarchaea group; Methanomicrobia; Methanomicrobiales; Methanomicrobiaceae; Methanolacinia	Methanolacinia paynteri	provirus	18468		2	1	non-gut
vir049	CP002565.1@1685936-1701465		GenBank	virus	HK97	0	Methanosarcinales	Archaea; Euryarchaeota; Stenosarchaea group; Methanomicrobia; Methanotrichales; Methanotrichaceae; Methanosaeta	Methanosaeta concilii	provirus	15530		1	1	non-gut
vir050	CP002566.1		GenBank	plasmid	no	0	Methanosarcinales	Archaea; Euryarchaeota; Stenosarchaea group; Methanomicrobia; Methanotrichales; Methanotrichaceae; Methanosaeta	Methanosaeta	extrachromosomal	18019		0	0	non-gut
vir051	CP002772.1@1738107-1785386		GenBank	virus	HK97	0	Methanobacteriales	Archaea; Euryarchaeota; Methanomada group; Methanobacteria; Methanobacteriales; Methanobacteriaceae; Methanobacterium	Methanobacterium paludis	provirus (complete)	47280		0	0	non-gut
vir052	CP002792.1@312062-341038		GenBank	virus	HK97	0	Methanococcales	Archaea; Euryarchaeota; Methanomada group; Methanococci; Methanococcales; Methanococcaceae; Methanothermococcus	Methanothermococcus	provirus	28977		4	1	non-gut
vir053	CP002793.1		GenBank	plasmid	no	0	Methanococcales	Archaea; Euryarchaeota; Methanomada group; Methanococci; Methanococcales; Methanococcaceae; Methanothermococcus	Methanothermococcus	extrachromosomal	14930		0	0	non-gut
vir054	CP003118.1		GenBank	plasmid	no	2	Methanosarcinales	Archaea; Euryarchaeota; Stenosarchaea group; Methanomicrobia; Methanotrichales; Methanotrichaceae; Methanosaeta	Methanosaeta	extrachromosomal	11991		0	0	non-gut
vir055	CP003362.1@1187000-1230000		GenBank	virus	HK97	0	Methanosarcinales	Archaea; Euryarchaeota; Stenosarchaea group; Methanomicrobia; Methanosarcinales; Methanosarcinaceae; Methanomethylovorans	Methanomethylovorans hollandica	provirus	43001		0	0	non-gut
vir056	CP003363.1		GenBank	plasmid	no	2	Methanosarcinales	Archaea; Euryarchaeota; Stenosarchaea group; Methanomicrobia; Methanosarcinales; Methanosarcinaceae; Methanomethylovorans	Methanomethylovorans	extrachromosomal	285109	yes	39	12	non-gut
vir057	CP006933.1@1689223-1727486		GenBank	virus	HK97	1	Methanobacteriales	Archaea; Euryarchaeota; Methanomada group; Methanobacteria; Methanobacteriales; Methanobacteriaceae; Methanobacterium	Methanobacterium formicicum	provirus (complete)	38264		5	2	gut
vir058	CP009519.1		GenBank	plasmid	no	1	Methanosarcinales	Archaea; Euryarchaeota; Stenosarchaea group; Methanomicrobia; Methanosarcinales; Methanosarcinaceae; Methanosarcina	Methanosarcina	extrachromosomal	58133		14	4	non-gut
vir060	CP009525.1		GenBank	plasmid	no	0	Methanosarcinales	Archaea; Euryarchaeota; Stenosarchaea group; Methanomicrobia; Methanosarcinales; Methanosarcinaceae; Methanosarcina	Methanosarcina	extrachromosomal	32371		9	1	non-gut
vir061	CP009527.1		GenBank	plasmid	no	0	Methanosarcinales	Archaea; Euryarchaeota; Stenosarchaea group; Methanomicrobia; Methanosarcinales; Methanosarcinaceae; Methanosarcina	Methanosarcina	extrachromosomal	41698		24	5	non-gut
vir063	CP014265.1@2066800-2108000		GenBank	virus	HK97	38	Methanobacteriales	Archaea; Euryarchaeota; Methanomada group; Methanobacteria; Methanobacteriales; Methanobacteriaceae; Methanobrevibacter	Methanobrevibacter olleyae	provirus (complete)	41201		1	1	gut
vir064	CP044013.1@1493241-1518755		GenBank	virus	HK97	16	Methanobacteriales	Archaea; Euryarchaeota; Methanomada group; Methanobacteria; Methanobacteriales; Methanobacteriaceae; Methanothermobacter	Methanothermobacter thermautotrophicus str. Delta H	provirus (complete)	25515		0	0	non-gut
vir065	CP047880.1@999627-1038867		GenBank	virus	HK97	0	Methanomassiliicoccales	Archaea; Candidatus Thermoplasmatota; Thermoplasmata; Methanomassiliicoccales; Candidatus Methanomethylophilaceae; Candidatus Methanomethylophilus; unclassified Candidatus Methanomethylophilus	Methanomassiliicoccaceae archaeon	provirus	39241	yes	5	1	gut
vir068	DAJM01000001.1@22895-60788		GenBank	virus	HK97	0	Methanosarcinales	Archaea; Euryarchaeota; Stenosarchaea group; Methanomicrobia; Methanosarcinales; Candidatus Methanoperedenaceae; Methanoperedens	Candidatus Methanoperedens sp.	provirus	37894		1	1	non-gut
vir069	DANA01000036.1@19045-35932		GenBank	virus	DJR	0	Methanomicrobiales	Archaea; Euryarchaeota; Stenosarchaea group; Methanomicrobia; Methanomicrobiales; Methanoregulaceae; Methanoregula	Methanoregula	provirus	16888		0	0	non-gut
vir070	DANZ01000143.1@27000-61097		GenBank	virus	HK97	0	Methanosarcinales	Archaea; Euryarchaeota; Stenosarchaea group; Methanomicrobia; Methanosarcinales; Methanosarcinaceae; Methanolobus	Methanolobus	provirus (incomplete)	34098		0	0	non-gut
vir071	DASP01000002.1@107503-149447		GenBank	virus	HK97	0	Methanomicrobiales	Archaea; Euryarchaeota; Stenosarchaea group; Methanomicrobia; Methanomicrobiales; Methanoregulaceae; Methanoregula	Methanoregulaceae archaeon	provirus	41945		4	2	non-gut
vir072	DAUQ01000011.1@50000-84000		GenBank	virus	HK97	0	Methanomassiliicoccales	Archaea; Candidatus Thermoplasmatota; Thermoplasmata; Methanomassiliicoccales; Methanomassiliicoccaceae; Methanomassiliicoccus	Methanomassiliicoccus sp.	provirus	34001		3	1	non-gut
vir073	DM36_Spad_Metabat2_bin80_50396_12@1099-43791		this study	virus	HK97	6	Methanobacteriales	Archaea; Euryarchaeota; Methanomada group; Methanobacteria; Methanobacteriales; Methanobacteriaceae; Methanobrevibacter	Methanobrevibacter	provirus (complete)	42693		11	4	gut
vir074	DUGU01000226.1@1-44807		GenBank	virus	HK97	0	Methanomicrobiales	Archaea; Euryarchaeota; Stenosarchaea group; Methanomicrobia; Methanomicrobiales; Methanoregulaceae; Methanoregula	Methanoregulaceae archaeon	provirus	44807		5	3	non-gut
vir075	FOAK01000003.1@75880-114500		GenBank	virus	HK97	1	Methanobacteriales	Archaea; Euryarchaeota; Methanomada group; Methanobacteria; Methanobacteriales; Methanobacteriaceae; Methanobrevibacter	Methanobrevibacter	provirus (complete)	38621		11	6	gut
vir076	FPAO01000008.1@126168-166159		GenBank	virus	HK97	1	Methanosarcinales	Archaea; Euryarchaeota; Stenosarchaea group; Methanomicrobia; Methanosarcinales; Methanosarcinaceae; Methanosarcina	Methanosarcina mazei	provirus	39992		0	0	non-gut
vir077	Ga0074193_1000230		IMG/VR	virus	HK97	1	Methanosarcinales	Archaea; Euryarchaeota; Stenosarchaea group; Methanomicrobia; Methanosarcinales; Methanosarcinaceae; Methanosarcina	Methanosarcina sp. UBA363	unknown	103120		0	0	non-gut
vir078	Ga0074195_1000864		IMG/VR	virus	HK97	2	Methanobacteriales	Archaea; Euryarchaeota; Methanomada group; Methanobacteria; Methanobacteriales; Methanobacteriaceae; Methanobacterium	Methanobacterium subterraneum	extrachromosomal	50488		1	1	non-gut
vir079	Ga0074195_1000935		IMG/VR	virus	HK97	0	Methanosarcinales	Archaea; Euryarchaeota; Stenosarchaea group; Methanomicrobia; Methanotrichales; Methanotrichaceae; Methanothrix		unknown	47467		0	0	non-gut
vir080	Ga0104061_100552		IMG/VR	virus	HK97	160	Methanobacteriales	Archaea; Euryarchaeota; Methanomada group; Methanobacteria; Methanobacteriales; Methanobacteriaceae; Methanobrevibacter	Methanobrevibacter smithii	extrachromosomal	53292		1	1	gut
vir086	Ga0116185_1003155		IMG/VR	virus	HK97	0	Methanosarcinales	Archaea; Euryarchaeota; Stenosarchaea group; Methanomicrobia; Methanosarcinales	Methanothrix	unknown	14496		0	0	non-gut
vir087	Ga0119875_100108		IMG/VR	virus	HK97	31	Methanobacteriales	Archaea; Euryarchaeota; Methanomada group; Methanobacteria; Methanobacteriales; Methanobacteriaceae; Methanothermobacter	Methanothermobacter defluvii	unknown	38950		0	0	non-gut
vir089	Ga0123350_10000432		IMG/VR	virus	HK97	0	Methanobacteriales	Archaea; Euryarchaeota; Methanomada group; Methanobacteria; Methanobacteriales; Methanobacteriaceae; Methanobrevibacter	Methanobrevibacter	extrachromosomal	32986		0	0	gut
vir091	Ga0134095_1000848		IMG/VR	virus	HK97	22	Methanobacteriales	Archaea; Euryarchaeota; Methanomada group; Methanobacteria; Methanobacteriales; Methanobacteriaceae; Methanothermobacter	Methanothermobacter sp	extrachromosomal	25452		0	0	non-gut
vir093	Ga0134835_1000258		IMG/VR	virus	HK97	19	Methanosarcinales	Archaea; Euryarchaeota; Stenosarchaea group; Methanomicrobia; Methanosarcinales; Methanosarcinaceae; Methanosarcina	Methanosarcina mazei	extrachromosomal	73512		3	1	non-gut
vir094	Ga0134835_1001038		IMG/VR	virus	HK97	34	Methanomicrobiales	Archaea; Euryarchaeota; Stenosarchaea group; Methanomicrobia; Methanomicrobiales; Methanomicrobiaceae; Methanoculleus	Methanoculleus sp. UBA416	extrachromosomal	33479		0	0	non-gut
vir095	Ga0134843_1000584		IMG/VR	virus	HK97	26	Methanomicrobiales	Archaea; Euryarchaeota; Stenosarchaea group; Methanomicrobia; Methanomicrobiales; Methanomicrobiaceae; Methanoculleus	Methanoculleus sp. UBA413	unknown	42752		1	1	non-gut
vir096	Ga0134843_1001679		IMG/VR	plasmid	no	0	Methanosarcinales	Archaea; Euryarchaeota; Stenosarchaea group; Methanomicrobia; Methanotrichales; Methanotrichaceae; Methanothrix	Methanothrix	extrachromosomal	17759		0	0	non-gut
vir097	Ga0134854_1000795		IMG/VR	virus	HK97	0	Methanobacteriales	Archaea; Euryarchaeota; Methanomada group; Methanobacteria; Methanobacteriales; Methanobacteriaceae; Methanobacterium	Methanobacterium sp.	extrachromosomal	37341		5	2	non-gut
vir098	Ga0167330_1000696		IMG/VR	plasmid	no	0	Methanosarcinales	Archaea; Euryarchaeota; Stenosarchaea group; Methanomicrobia; Methanotrichales; Methanotrichaceae; Methanothrix	Methanothrix	extrachromosomal	17079		0	0	non-gut
vir099	Ga0172381_10000303		IMG/VR	virus	HK97	0	Methanosarcinales	Archaea;Euryarchaeota;Methanomicrobia;Methanomicrobiales	Methanomicrobiales	extrachromosomal	60257		0	0	non-gut
vir100	Ga0183098_10710		IMG/VR	virus	HK97	14	Methanomicrobiales	Archaea; Euryarchaeota; Stenosarchaea group; Methanomicrobia; Methanomicrobiales; Methanocorpusculaceae; Methanocorpusculum	Methanocorpusculum archaeon Methan_05	extrachromosomal	36099		3	1	non-gut
vir101	Ga0194137_10000078		IMG/VR	plasmid	no	8	Methanosarcinales	Archaea; Euryarchaeota; Stenosarchaea group; Methanomicrobia; Methanosarcinales; Methanosarcinaceae; Methanosarcina	Methanosarcina sp. 1.H.T.1A.1	extrachromosomal	59737		5	1	non-gut
vir102	Ga0208461_1002094		IMG/VR	plasmid	no	0	Methanosarcinales	Archaea; Euryarchaeota; Stenosarchaea group; Methanomicrobia; Methanotrichales; Methanotrichaceae; Methanothrix	Methanothrix	unknown	16863		0	0	non-gut
vir105	Ga0208940_1003700		IMG/VR	plasmid	no	0	Methanosarcinales	Archaea; Euryarchaeota; Stenosarchaea group; Methanomicrobia; Methanotrichales; Methanotrichaceae; Methanothrix	Methanothrix	unknown	12642		0	0	non-gut
vir106	Ga0209318_1000159		IMG/VR	virus	HK97	5	Methanosarcinales	Archaea; Euryarchaeota; Stenosarchaea group; Methanomicrobia; Methanosarcinales; Methanosarcinaceae; Methanosarcina	Methanosarcina sp. 1.H.T.1A.1	extrachromosomal	73429		1	1	non-gut
vir107	Ga0209340_1001372		IMG/VR	virus	HK97	0	Methanosarcinales	Archaea; Euryarchaeota; Stenosarchaea group; Methanomicrobia; Methanotrichales; Methanotrichaceae; Methanosaeta	Methanosaeta	unknown	17813		2	1	non-gut
vir108	Ga0209492_1000013		IMG/VR	virus	HK97	0	Methanosarcinales	Archaea; Euryarchaeota; Stenosarchaea group; Methanomicrobia; Methanotrichales; Methanotrichaceae; Methanosaeta	Methanomicrobia (Methanosaeta)	extrachromosomal	61387		0	0	non-gut
vir109	Ga0209510_1004392		IMG/VR	plasmid	no	0	Methanosarcinales	Archaea; Euryarchaeota; Stenosarchaea group; Methanomicrobia; Methanotrichales; Methanotrichaceae; Methanothrix	Methanothrix	unknown	12461		0	0	non-gut
vir110	Ga0209537_1001011		IMG/VR	virus	HK97	62	Methanomicrobiales	Archaea; Euryarchaeota; Stenosarchaea group; Methanomicrobia; Methanomicrobiales; Methanomicrobiaceae; Methanoculleus	Candidatus Methanoculleus thermohydrogenotrophicum	unknown	32913		0	0	non-gut
vir111	Ga0209639_1000314		IMG/VR	virus	HK97	6	Methanosarcinales	Archaea; Euryarchaeota; Stenosarchaea group; Methanomicrobia; Methanosarcinales; Methanosarcinaceae; Methanosarcina	Methanosarcina barkeri 3	unknown	73340		0	0	non-gut
vir112	Ga0209723_1000499		IMG/VR	plasmid	no	1	Methanosarcinales	Archaea; Euryarchaeota; Stenosarchaea group; Methanomicrobia; Methanotrichales; Methanotrichaceae; Methanothrix	Methanothrix soehngenii GP6	unknown	72443		11	4	non-gut
vir113	Ga0209723_1004764		IMG/VR	virus	HK97	0	Methanosarcinales	Archaea; Euryarchaeota; Stenosarchaea group; Methanomicrobia; Methanotrichales; Methanotrichaceae; Methanosaeta	Methanosaeta	unknown	14754		0	0	non-gut
vir114	Ga0214517_100030		IMG/VR	virus	HK97	2	Methanobacteriales	Archaea; Euryarchaeota; Methanomada group; Methanobacteria; Methanobacteriales; Methanobacteriaceae; Methanobrevibacter	Methanobrevibacter millerae	provirus (incomplete)	55733		14	3	gut
vir115	Ga0214925_100249		IMG/VR	virus	HK97	27	Methanobacteriales	Archaea; Euryarchaeota; Methanomada group; Methanobacteria; Methanobacteriales; Methanobacteriaceae; Methanobrevibacter	Methanobrevibacter boviskoreani JH1	extrachromosomal	38346		10	3	gut
vir116	Ga0226657_10000919		IMG/VR	virus	HK97	0	Methanosarcinales	Archaea; Euryarchaeota; Stenosarchaea group; Methanomicrobia; Methanotrichales; Methanotrichaceae; Methanothrix	Methanothrix	extrachromosomal	49603		2	1	non-gut
vir118	Ga0247611_10000764		IMG/VR	virus	HK97	1	Methanobacteriales	Archaea; Euryarchaeota; Methanomada group; Methanobacteria; Methanobacteriales; Methanobacteriaceae; Methanobrevibacter	Methanobrevibacter millerae	extrachromosomal	62758		7	2	gut
vir119	Ga0255811_10502937		IMG/VR	virus	HK97	0	Methanomicrobiales	Archaea; Euryarchaeota; Stenosarchaea group; Methanomicrobia; Methanomicrobiales; Methanoregulaceae; Methanoregula	Methanoregulaceae	unknown	57895		0	0	non-gut
vir120	Ga0255812_10398120		IMG/VR	virus	HK97	56	Methanomicrobiales	Archaea; Euryarchaeota; Stenosarchaea group; Methanomicrobia; Methanomicrobiales; Methanomicrobiaceae; Methanoculleus	Methanoculleus	unknown	46469	yes	0	0	non-gut
vir121	Ga0256405_10002290		IMG/VR	virus	HK97	14	Methanobacteriales	Archaea; Euryarchaeota; Methanomada group; Methanobacteria; Methanobacteriales; Methanobacteriaceae; Methanobrevibacter	uncultured Methanobrevibacter sp.	extrachromosomal	44891		1	1	gut
vir122	Ga0265295_1000600		IMG/VR	virus	HK97	503	Methanosarcinales	Archaea; Euryarchaeota; Stenosarchaea group; Methanomicrobia; Methanosarcinales; Methanosarcinaceae; Methanosarcina	Methanosarcina mazei	extrachromosomal	71237		10	4	non-gut
vir123	Ga0265295_1001691		IMG/VR	virus	HK97	25	Methanomicrobiales	Archaea; Euryarchaeota; Stenosarchaea group; Methanomicrobia; Methanomicrobiales; Methanocorpusculaceae; Methanocorpusculum	Methanocorpusculum sp	extrachromosomal	37720		0	0	non-gut
vir125	Ga0326512_10000437		IMG/VR	virus	HK97	11	Methanobacteriales	Archaea; Euryarchaeota; Methanomada group; Methanobacteria; Methanobacteriales; Methanobacteriaceae; Methanobrevibacter	uncultured Methanobrevibacter sp.	unknown	36713		1	1	gut
vir126	Ga0326513_10000143		IMG/VR	virus	HK97	12	Methanobacteriales	Archaea; Euryarchaeota; Methanomada group; Methanobacteria; Methanobacteriales; Methanobacteriaceae; Methanobrevibacter	uncultured Methanobrevibacter sp.	extrachromosomal	56676		10	1	gut
vir127	Ga0326514_10000248		IMG/VR	virus	HK97	9	Methanobacteriales	Archaea; Euryarchaeota; Methanomada group; Methanobacteria; Methanobacteriales; Methanobacteriaceae; Methanobrevibacter	uncultured Methanobrevibacter sp	extrachromosomal	36062		1	1	gut
vir128	GG26_Megh_Metabat2_bin63_609729_5@450685-485146		this study	virus	HK97	0	Methanobacteriales	Archaea; Euryarchaeota; Methanomada group; Methanobacteria; Methanobacteriales; Methanobacteriaceae; Methanobrevibacter	Methanobrevibacter	provirus (complete)	34462		10	3	gut
vir129	GUT_GENOME029117_5@17845-51994		10.1038/s41587-020-0603-3	virus	HK97	1	Methanobacteriales	Archaea; Euryarchaeota; Methanomada group; Methanobacteria; Methanobacteriales; Methanobacteriaceae; Methanobrevibacter	Methanobrevibacter smithii	provirus (complete)	38600		8	2	gut
vir130	GUT_GENOME088591_3@67900-112679		10.1038/s41587-020-0603-3	virus	HK97	254	Methanobacteriales	Archaea; Euryarchaeota; Methanomada group; Methanobacteria; Methanobacteriales; Methanobacteriaceae; Methanobrevibacter	Methanobrevibacter smithii_A	provirus (complete)	46847		0	0	gut
vir131	HG796201.1@65000-105000		GenBank	virus	HK97	2	Methanobacteriales	Archaea; Euryarchaeota; Methanomada group; Methanobacteria; Methanobacteriales; Methanobacteriaceae; Methanobrevibacter	Methanobrevibacter oralis JMR01	provirus (incomplete - assembly gap)	40001		5	1	gut
vir132	IMGVR_UViG_2642422540_000001		IMG/VR	plasmid	no	0	Methanosarcinales	Archaea; Euryarchaeota; Stenosarchaea group; Methanomicrobia; Methanosarcinales; Methanosarcinaceae; Methanolobus	Methanolobus	provirus	10488		0	0	non-gut
vir133	IMGVR_UViG_2642422561_000001		IMG/VR	plasmid	no	0	Methanosarcinales	Archaea; Euryarchaeota; Stenosarchaea group; Methanomicrobia; Methanosarcinales; Methanosarcinaceae; Methanolobus	Methanolobus	provirus	10198		0	0	non-gut
vir134	Iso3TCLC_10000138		IMG/VR	virus	HK97	6	Methanosarcinales	Archaea; Euryarchaeota; Stenosarchaea group; Methanomicrobia; Methanotrichales; Methanotrichaceae; Methanosaeta	Methanosaeta sp. UBA533	unknown	59835	yes	4	2	non-gut
vir136	JAAXOC010000118.1		GenBank	plasmid	no	0	Methanosarcinales	Archaea; Euryarchaeota; Stenosarchaea group; Methanomicrobia; Methanosarcinales; Methanosarcinales incertae sedis; ANME-2	ANME-2	extrachromosomal	5399		0	0	non-gut
vir137	JAAXOD010000026.1		10.1038/s41467-020-17860-8	virus	HK97	0	Methanosarcinales	Archaea; Euryarchaeota; Stenosarchaea group; Methanomicrobia; Methanosarcinales; Methanosarcinales incertae sedis; ANME-2	ANME-2	extrachromosomal	51664	yes	0	0	non-gut
vir139	JAAYAX010000004.1@145934-188425		GenBank	virus	HK97	0	Methanomassiliicoccales	Archaea; Candidatus Thermoplasmatota; Thermoplasmata; Methanomassiliicoccales; Methanomassiliicoccaceae; Methanomassiliicoccus	Methanomassiliicoccus	provirus	42492		0	0	non-gut
vir140	JABLXE010000019.1		GenBank	virus	HK97	0	Methanosarcinales	Archaea; Euryarchaeota; Stenosarchaea group; Methanomicrobia; Methanotrichales; Methanotrichaceae	Methanotrichaceae	unknown	38857		10	2	non-gut
vir141	JACDUH010000002.1@293324-308056		GenBank	virus	DJR	0	Methanococcales	Archaea; Euryarchaeota; Methanomada group; Methanococci; Methanococcales; Methanococcaceae; Methanococcus	Methanococcus maripaludis	provirus	14733		0	0	non-gut
vir142	JADQBZ010000002.1@121000-153000		GenBank	virus	HK97	0	Methanosarcinales	Archaea; Euryarchaeota; Stenosarchaea group; Methanomicrobia; Methanosarcinales; Methanosarcinaceae; Methanolobus	Methanolobus	provirus (incomplete)	32001		0	0	non-gut
vir143	JAFGWE010000037.1@6559-50398		GenBank	virus	HK97	0	Methanomicrobiales	Archaea; Euryarchaeota; Stenosarchaea group; Methanomicrobia; Methanomicrobiales; Methanomicrobiaceae	Methanomicrobiaceae archaeon	provirus	43840		0	0	non-gut
vir147	JAFXOA010000200.1@1-37594		10.1186/s40168-021-01078-x	virus	HK97	0	Methanomassiliicoccales	Archaea; Candidatus Thermoplasmatota; Thermoplasmata; Methanomassiliicoccales; Candidatus Methanomethylophilaceae; Candidatus Methanomethylophilus; unclassified Candidatus Methanomethylophilus	Methanomethylophilaceae	extrachromosomal	37594	yes	4	1	gut
vir148	JAFYAH010000036.1@40648-77091		GenBank	virus	HK97	1	Methanomassiliicoccales	Archaea; Candidatus Thermoplasmatota; Thermoplasmata; Methanomassiliicoccales; Candidatus Methanomethylophilaceae; Candidatus Methanomethylophilus; unclassified Candidatus Methanomethylophilus	Candidatus Methanomethylophilaceae	provirus (complete)	36444		1	1	gut
vir149	JAFYFD010000228.1		10.1186/s40168-021-01078-x	virus	HK97	4	Methanomassiliicoccales	Archaea; Candidatus Thermoplasmatota; Thermoplasmata; Methanomassiliicoccales; Candidatus Methanomethylophilaceae; Candidatus Methanomethylophilus; unclassified Candidatus Methanomethylophilus	Methanomethylophilaceae	extrachromosomal	40604		1	1	gut
vir150	JAGAJZ010000056.1@1-21899		10.1186/s40168-021-01078-x	virus	DJR	0	Methanomicrobiales	Archaea; Euryarchaeota; Stenosarchaea group; Methanomicrobia; Methanomicrobiales; Methanocorpusculaceae; Methanocorpusculum	Methanocorpusculum	extrachromosomal	21899	yes	3	1	gut
vir152	JAGGLK010000002.1@456000-521646		GenBank	virus	HK97	0	Methanosarcinales	Archaea; Euryarchaeota; Stenosarchaea group; Methanomicrobia; Methanosarcinales; Methanosarcinaceae; Methanohalophilus	Methanohalophilus levihalophilus	provirus	65647		0	0	non-gut
vir153	JAHDPF010000079.1@84445-98157		GenBank	virus	HK97	0	Methanosarcinales	Archaea; Euryarchaeota; Stenosarchaea group; Methanomicrobia; Methanotrichales; Methanotrichaceae; Methanothrix	Methanothrix harundinacea	provirus	13713		0	0	non-gut
vir154	JAHDSG010000174.1@1-38906		10.1073/pnas.2020024118	virus	HK97	24	Methanosarcinales	Archaea; Euryarchaeota; Stenosarchaea group; Methanomicrobia; Methanotrichales; Methanotrichaceae; Methanosaeta	Methanosaeta harundinacea	extrachromosomal	38906		1	1	non-gut
vir155	JJPA01000071.1@1-56152		10.1038/ismej.2015.31	virus	HK97	237	Methanosarcinales	Archaea; Euryarchaeota; Stenosarchaea group; Methanomicrobia; Methanosarcinales; Methanosarcinaceae; Methanosarcina	Methanosarcina mazei	extrachromosomal	56152		0	0	non-gut
vir156	JJPI01000153.1		GenBank	plasmid	no	72	Methanosarcinales	Archaea; Euryarchaeota; Stenosarchaea group; Methanomicrobia; Methanosarcinales; Methanosarcinaceae; Methanosarcina	Methanosarcina	extrachromosomal	21095		0	0	non-gut
vir160	KK211376.1@183315-221216		GenBank	virus	HK97	9	Methanobacteriales	Archaea; Euryarchaeota; Methanomada group; Methanobacteria; Methanobacteriales; Methanobacteriaceae; Methanobrevibacter	Methanobrevibacter boviskoreani JH1	provirus (complete)	37902		17	5	gut
vir161	L77118.1		GenBank	plasmid	no	0	Methanococcales	Archaea; Euryarchaeota; Methanomada group; Methanococci; Methanococcales; Methanocaldococcaceae; Methanocaldococcus	Methanocaldococcus	extrachromosomal	58407		0	0	non-gut
vir162	L77119.1		GenBank	plasmid	no	1	Methanococcales	Archaea; Euryarchaeota; Methanomada group; Methanococci; Methanococcales; Methanocaldococcaceae; Methanocaldococcus	Methanocaldococcus	extrachromosomal	16550		0	0	non-gut
vir163	LHQS01000002.1@1099884-1116646		GenBank	virus	DJR	0	Methanomicrobiales	Archaea; Euryarchaeota; Stenosarchaea group; Methanomicrobia; Methanomicrobiales; Methanomicrobiaceae; Methanoculleus	Methanoculleus taiwanensi	provirus	16763		0	0	non-gut
vir164	LMVM01000002.1@67998-114667		GenBank	virus	HK97	0	Methanobacteriales	Archaea; Euryarchaeota; Methanomada group; Methanobacteria; Methanobacteriales; Methanobacteriaceae; Methanobacterium	Methanobacterium bryantii	provirus (incomplete)	46670		0	0	non-gut
vir165	LMVM01000003.1		GenBank	plasmid	no	0	Methanobacteriales	Archaea; Euryarchaeota; Methanomada group; Methanobacteria; Methanobacteriales; Methanobacteriaceae; Methanobacterium	Methanobacterium	extrachromosomal	88781		0	0	non-gut
vir169	LR792633.1		GenBank	plasmid	no	1	Methanococcales	Archaea; Euryarchaeota; Methanomada group; Methanococci; Methanococcales; Methanocaldococcaceae; Methanocaldococcus	Methanocaldococcus	extrachromosomal	5142		0	0	non-gut
vir170	LT607757.1		GenBank	plasmid	no	1	Methanobacteriales	Archaea; Euryarchaeota; Methanomada group; Methanobacteria; Methanobacteriales; Methanobacteriaceae; Methanobacterium	Methanobacterium	extrachromosomal	18118		4	2	non-gut
vir174	MBKP01000005.1@33687-70595		GenBank	virus	HK97	0	Methanosarcinales	Archaea; Euryarchaeota; Stenosarchaea group; Methanomicrobia; Methanosarcinales; Methanosarcinaceae; Methanolobus	Methanolobus psychrotolerans	provirus	36909		0	0	non-gut
vir175	MF186604.1	MetSV	GenBank	virus	spherical	4	Methanosarcinales	Archaea; Euryarchaeota; Stenosarchaea group; Methanomicrobia; Methanosarcinales; Methanosarcinaceae; Methanosarcina	Methanosarcina	extrachromosomal	10567		0	0	non-gut
vir176	MGV-GENOME-0254337		10.1038/s41564-021-00928-6	virus	HK97	5	Methanomassiliicoccales	Archaea; Candidatus Thermoplasmatota; Thermoplasmata; Methanomassiliicoccales; Candidatus Methanomethylophilaceae; Candidatus Methanomethylophilus; unclassified Candidatus Methanomethylophilus	Methanomethylophilaceae UBA71	extrachromosomal	37478		6	2	gut
vir177	MGV-GENOME-0256539		10.1038/s41564-021-00928-6	virus	HK97	8	Methanomassiliicoccales	Archaea; Candidatus Thermoplasmatota; Thermoplasmata; Methanomassiliicoccales; Candidatus Methanomethylophilaceae; Candidatus Methanomethylophilus; unclassified Candidatus Methanomethylophilus	Methanomethylophilaceae UBA71	unknown	37854	yes	8	3	gut
vir180	MGV-GENOME-0318983		10.1038/s41564-021-00928-6	virus	HK97	375	Methanobacteriales	Archaea; Euryarchaeota; Methanomada group; Methanobacteria; Methanobacteriales; Methanobacteriaceae; Methanobrevibacter	Methanobrevibacter smithii	extrachromosomal	53669		15	3	gut
vir181	MGV-GENOME-0327529		10.1038/s41564-021-00928-6	virus	HK97	82	Methanobacteriales	Archaea; Euryarchaeota; Methanomada group; Methanobacteria; Methanobacteriales; Methanobacteriaceae; Methanobrevibacter	Methanobrevibacter smithii	extrachromosomal	57783		14	4	gut
vir182	MGV-GENOME-0355038		10.1038/s41564-021-00928-6	virus	HK97	0	Methanomassiliicoccales	Archaea; Candidatus Thermoplasmatota; Thermoplasmata; Methanomassiliicoccales	Methanomassiliicoccales	extrachromosomal	84332	yes	0	0	gut
vir183	MGV-GENOME-0375013		10.1038/s41564-021-00928-6	virus	HK97	268	Methanobacteriales	Archaea; Euryarchaeota; Methanomada group; Methanobacteria; Methanobacteriales; Methanobacteriaceae; Methanobrevibacter	Methanobrevibacter smithii	unknown	143197		38	8	gut
vir184	MH674343.1	Drs3	GenBank	virus	HK97	4	Methanobacteriales	Archaea; Euryarchaeota; Methanomada group; Methanobacteria; Methanobacteriales; Methanobacteriaceae; Methanobacterium	Methanobacterium sp.	extrachromosomal	37129		3	1	non-gut
vir185	MK170447.1	MetMV	GenBank	virus	HK97	0	Methanosarcinales	Archaea; Euryarchaeota; Stenosarchaea group; Methanomicrobia; Methanosarcinales; Methanosarcinaceae; Methanosarcina	Methanosarcina	extrachromosomal	67826		0	0	non-gut
vir186	MR31_SpadScaf_Metabat2_bin94_140883_1@64671-98501		this study	virus	HK97	3	Methanomicrobiales	Archaea; Euryarchaeota; Stenosarchaea group; Methanomicrobia; Methanomicrobiales	Methanomicrobiales	provirus	33830		20	4	gut
vir187	MR31_SpadScaf_Metabat2_bin94_72511_10@21057-54350		this study	virus	HK97	0	Methanomicrobiales	Archaea; Euryarchaeota; Stenosarchaea group; Methanomicrobia; Methanomicrobiales	Methanomicrobiales	provirus	33293		0	0	gut
vir188	MR31_SpadScaf_Metabat2_bin94_97535_4@39446-59639		this study	virus	DJR	4	Methanomicrobiales	Archaea; Euryarchaeota; Stenosarchaea group; Methanomicrobia; Methanomicrobiales	Methanomicrobiales	provirus	20193		2	1	gut
vir189	MRZU01000003.1@16000-32000		GenBank	virus	VP4	0	Methanonatronarachaeales	Archaea; Euryarchaeota; Methanonatronarchaeia; Methanonatronarchaeales; Methanonatronarchaeaceae; Methanonatronarchaeum	Methanonatronarchaeum thermophilum	provirus	16001		0	0	non-gut
vir190	MRZU01000003.1@294211-304151		GenBank	virus	VP4	0	Methanonatronarachaeales	Archaea; Euryarchaeota; Methanonatronarchaeia; Methanonatronarchaeales; Methanonatronarchaeaceae; Methanonatronarchaeum	Methanonatronarchaeum thermophilum	provirus	9941		0	0	non-gut
vir191	MRZU01000004.1@222734-237193		GenBank	virus	VP4	0	Methanonatronarachaeales	Archaea; Euryarchaeota; Methanonatronarchaeia; Methanonatronarchaeales; Methanonatronarchaeaceae; Methanonatronarchaeum	Methanonatronarchaeum thermophilum	provirus	14460		0	0	non-gut
vir192	MSDW01000001.1@744857-769657		GenBank	virus	VP4	0	Methanonatronarachaeales	Archaea; Euryarchaeota; Methanonatronarchaeia; Methanonatronarchaeales; Methanonatronarchaeaceae; Methanohalarchaeum	Methanohalarchaeum thermophilum	provirus	24801		0	0	non-gut
vir193	MSDW01000002.1@337684-347227		GenBank	virus	VP4	0	Methanonatronarachaeales	Archaea; Euryarchaeota; Methanonatronarchaeia; Methanonatronarchaeales; Methanonatronarchaeaceae; Methanohalarchaeum	Methanohalarchaeum thermophilum	provirus	9544		0	0	non-gut
vir194	MSGU01000057.1@34723-65828		GenBank	virus	DJR	0	Methanomicrobiales	Archaea; Euryarchaeota; Stenosarchaea group; Methanomicrobia; Methanomicrobiales; Methanocorpusculaceae	Methanocorpusculaceae	provirus	31106	yes	5	2	gut
vir195	MVRA01000001.1		GenBank	plasmid	no	0	Methanocellales	Archaea; Euryarchaeota; Stenosarchaea group; Methanomicrobia; Methanocellales; Methanocellaceae; Methanocella	Methanocella	extrachromosomal	16415		7	2	non-gut
vir196	MZ171369.1	Blf4	GenBank	virus	HK97	92	Methanomicrobiales	Archaea; Euryarchaeota; Stenosarchaea group; Methanomicrobia; Methanomicrobiales; Methanomicrobiaceae; Methanoculleus	Methanoculleus	extrachromosomal	37078		0	0	non-gut
vir197	NAPDCCLC_10014439		IMG/VR	virus	HK97	12	Methanosarcinales	Archaea; Euryarchaeota; Stenosarchaea group; Methanomicrobia; Methanotrichales; Methanotrichaceae; Methanothrix	Methanothrix	extrachromosomal	36211		0	0	non-gut
vir198	NC_001336.1		GenBank	plasmid	no	1	Methanobacteriales	Archaea; Euryarchaeota; Methanomada group; Methanobacteria; Methanobacteriales; Methanobacteriaceae; Methanothermobacter	Methanothermobacter	extrachromosomal	13514		7	2	non-gut
vir204	PGYO01000001.1@399000-456000		GenBank	virus	HK97	0	Methanobacteriales	Archaea; Euryarchaeota; Methanomada group; Methanobacteria; Methanobacteriales	Methanobacteriales archaeon	provirus (complete)	57001		0	0	non-gut
vir205	Pig88_SpadScaf_Metabat_bin21_35779_22@1-35779		this study	virus	HK97	0	Methanobacteriales	Archaea; Euryarchaeota; Methanomada group; Methanobacteria; Methanobacteriales; Methanobacteriaceae; Methanobrevibacter	Methanobrevibacter	unknown	35779		12	4	gut
vir207	QGMZ01000015.1@56000-93000		GenBank	virus	HK97	3	Methanomicrobiales	Archaea; Euryarchaeota; Stenosarchaea group; Methanomicrobia; Methanomicrobiales; Methanospirillaceae; Methanospirillum	Methanospirillum sp	provirus	37001		0	0	non-gut
vir208	rhino20_SpadScaf_Metabat_bin47_73597_10@10260-56483		this study	virus	HK97	0	Methanomicrobiales	Archaea;Euryarchaeota;Methanomicrobia;Methanomicrobiales	Methanomicrobiales	provirus (incomplete)	50000		0	0	gut
vir209	RU52_SpadScaf_Metabat2_bin174_60073_8@1-50000		this study	virus	HK97	3	Methanobacteriales	Archaea; Euryarchaeota; Methanomada group; Methanobacteria; Methanobacteriales; Methanobacteriaceae; Methanobrevibacter	Methanobrevibacter smithii	provirus (incomplete)	47630		0	0	gut
vir210	RXIL01000038.1		GenBank	plasmid	no	0	Methanoliparales	Archaea; Euryarchaeota; Candidatus Methanoliparia; Candidatus Methanoliparales; Candidatus Methanollivieraceae; Methanolliviera	Methanolliviera	extrachromosomal	12764		0	0	non-gut
vir211	RYFX01000064.1@29953-39231		GenBank	virus	VP4	0	Methanonatronarachaeales	Archaea; Euryarchaeota; Methanonatronarchaeia	Methanonatronarchaeia archaeon	provirus	9279		0	0	non-gut
vir213	SAMEA2737684_a1_ct238341_vs1		10.1073/pnas.2023202118	virus	HK97	291	Methanobacteriales	Archaea; Euryarchaeota; Methanomada group; Methanobacteria; Methanobacteriales; Methanobacteriaceae; Methanobrevibacter	Methanobrevibacter	unknown	41700		17	5	gut
vir214	SAMN09781779_a1_ct12975_vs1		10.1073/pnas.2023202118	virus	HK97	3	Methanomassiliicoccales	Archaea; Candidatus Thermoplasmatota; Thermoplasmata; Methanomassiliicoccales; Candidatus Methanomethylophilaceae; Candidatus Methanomethylophilus; unclassified Candidatus Methanomethylophilus	Methanomethylophilaceae UBA71	unknown	38145		10	3	gut
vir215	SRR11880836_SpadScaf_Metabat_bin42_37880_153@1-37880		this study	virus	HK97	5	Methanomassiliicoccales	Archaea; Candidatus Thermoplasmatota; Thermoplasmata; Methanomassiliicoccales; Candidatus Methanomethylophilaceae; Candidatus Methanomethylophilus; unclassified Candidatus Methanomethylophilus	Methanomethylophilaceae UBA71	provirus (incomplete)	37880	yes	6	2	gut
vir216	SRR6824188_SpadScaf_Metabat_bin83_29713_34@1-29713		this study	virus	HK97	2	Methanomassiliicoccales	Archaea; Candidatus Thermoplasmatota; Thermoplasmata; Methanomassiliicoccales; Candidatus Methanomethylophilaceae; Candidatus Methanomethylophilus; unclassified Candidatus Methanomethylophilus	Methanomethylophilaceae UBA71	provirus (incomplete)	29713		0	0	gut
vir220	SUTD01000001.1@90000-121000		GenBank	virus	HK97	2	Methanomicrobiales	Archaea; Euryarchaeota; Stenosarchaea group; Methanomicrobia; Methanomicrobiales; Methanocorpusculaceae; Methanocorpusculum	Methanocorpusculum parvum	provirus	31001	yes	0	0	gut
vir221	SUTG01000098.1		GenBank	plasmid	no	1	Methanobacteriales	Archaea; Euryarchaeota; Methanomada group; Methanobacteria; Methanobacteriales; Methanobacteriaceae; Methanobrevibacter	Methanobrevibacter	extrachromosomal	10471		0	0	gut
vir222	SUTI01000003.1@98000-140000		GenBank	virus	HK97	0	Methanobacteriales	Archaea; Euryarchaeota; Methanomada group; Methanobacteria; Methanobacteriales; Methanobacteriaceae; Methanobrevibacter	Methanobrevibacter	provirus (complete)	42001		15	5	gut
vir224	U78295.1		GenBank	plasmid	no	0	Methanosarcinales	Archaea; Euryarchaeota; Stenosarchaea group; Methanomicrobia; Methanosarcinales; Methanosarcinaceae; Methanosarcina	Methanosarcina	extrachromosomal	5467		0	0	non-gut
vir235	uvig_163681@1-37984		10.1016/j.cell.2021.01.029	virus	HK97	122	Methanobacteriales	Archaea; Euryarchaeota; Methanomada group; Methanobacteria; Methanobacteriales; Methanobacteriaceae; Methanobrevibacter	Methanobrevibacter smithii	unknown	37984		2	1	gut
vir237	uvig_174040@1-55887		10.1016/j.cell.2021.01.029	virus	HK97	288	Methanobacteriales	Archaea; Euryarchaeota; Methanomada group; Methanobacteria; Methanobacteriales; Methanobacteriaceae; Methanobrevibacter	Methanobrevibacter smithii	unknown	55887		14	3	gut
vir240	uvig_178408@1-52764		10.1016/j.cell.2021.01.029	virus	HK97	345	Methanobacteriales	Archaea; Euryarchaeota; Methanomada group; Methanobacteria; Methanobacteriales; Methanobacteriaceae; Methanobrevibacter	Methanobrevibacter smithii	extrachromosomal	52764		1	1	gut
vir243	uvig_185017@1-40538		10.1016/j.cell.2021.01.029	virus	HK97	71	Methanobacteriales	Archaea; Euryarchaeota; Methanomada group; Methanobacteria; Methanobacteriales; Methanobacteriaceae; Methanobrevibacter	Methanobrevibacter smithii	unknown	40538		9	3	gut
vir249	uvig_208229@1-52893		10.1016/j.cell.2021.01.029	virus	HK97	374	Methanobacteriales	Archaea; Euryarchaeota; Methanomada group; Methanobacteria; Methanobacteriales; Methanobacteriaceae; Methanobrevibacter	Methanobrevibacter smithii	extrachromosomal	52893		15	3	gut
vir250	uvig_217978@1189-51318		10.1016/j.cell.2021.01.029	virus	HK97	2	Methanobacteriales	Archaea; Euryarchaeota; Methanomada group; Methanobacteria; Methanobacteriales; Methanobacteriaceae; Methanobrevibacter	Methanobrevibacter	provirus (incomplete)	50130		6	3	gut
vir254	uvig_281916@1-36073		10.1016/j.cell.2021.01.029	virus	HK97	114	Methanobacteriales	Archaea; Euryarchaeota; Methanomada group; Methanobacteria; Methanobacteriales; Methanobacteriaceae; Methanobrevibacter	Methanobrevibacter smithii	extrachromosomal	36073		2	1	gut
vir258	uvig_364876@1049-50517		10.1016/j.cell.2021.01.029	virus	HK97	185	Methanobacteriales	Archaea; Euryarchaeota; Methanomada group; Methanobacteria; Methanobacteriales; Methanobacteriaceae; Methanobrevibacter	Methanobrevibacter smithii	provirus (incomplete)	49469		13	4	gut
vir259	uvig_368349@1-38348		10.1016/j.cell.2021.01.029	virus	HK97	6	Methanomassiliicoccales	Archaea; Candidatus Thermoplasmatota; Thermoplasmata; Methanomassiliicoccales; Candidatus Methanomethylophilaceae; Candidatus Methanomethylophilus; unclassified Candidatus Methanomethylophilus	Methanomethylophilaceae UBA71	extrachromosomal	38348	yes	6	2	gut
vir265	uvig_441795@1-46287		10.1016/j.cell.2021.01.029	virus	HK97	130	Methanobacteriales	Archaea; Euryarchaeota; Methanomada group; Methanobacteria; Methanobacteriales; Methanobacteriaceae; Methanobrevibacter	Methanobrevibacter smithii	unknown	46287		2	1	gut
vir271	uvig_558467@2843-38633		10.1016/j.cell.2021.01.029	virus	HK97	269	Methanobacteriales	Archaea; Euryarchaeota; Methanomada group; Methanobacteria; Methanobacteriales; Methanobacteriaceae; Methanobrevibacter	Methanobrevibacter smithii	provirus (incomplete)	35791		5	2	gut
vir272	uvig_563381@1-34568		10.1016/j.cell.2021.01.029	virus	HK97	1	Methanobacteriales	Archaea; Euryarchaeota; Methanomada group; Methanobacteria; Methanobacteriales; Methanobacteriaceae; Methanobrevibacter	Methanobrevibacter	unknown	34568		7	2	gut
vir275	uvig_591350@1-37178		10.1016/j.cell.2021.01.029	virus	HK97	5	Methanomassiliicoccales	Archaea; Candidatus Thermoplasmatota; Thermoplasmata; Methanomassiliicoccales; Candidatus Methanomethylophilaceae; Candidatus Methanomethylophilus; unclassified Candidatus Methanomethylophilus	Methanomethylophilaceae UBA71	unknown	37178	yes	7	3	gut
vir281	VIAQ01000015.1@266000-292000		GenBank	virus	HK97	0	Methanosarcinales	Archaea; Euryarchaeota; Stenosarchaea group; Methanomicrobia; Methanosarcinales; Methanosarcinaceae; Methanolobus	Methanolobus vulcani	provirus (incomplete)	26001		0	0	non-gut
vir282	WRMT01000138.1		GenBank	plasmid	no	0	Methanobacteriales	Archaea; Euryarchaeota; Methanomada group; Methanobacteria; Methanobacteriales; Methanobacteriaceae; Methanobrevibacter	Methanobrevibacter	extrachromosomal	7951		2	1	gut
vir284	Ga0181303_100014		this study	virus	HK97	0	Methanoliparales	Archaea; Euryarchaeota; Methanoliparia	Methanoliparia	unknown	63257		0	0	non-gut
vir285	3300005326.a@Ga0074195_1000350@1-65885		10.1038/s41587-020-0718-6	virus	HK97	0	Methanosarcinales	Archaea; Euryarchaeota; Stenosarchaea group; Methanomicrobia; Methanotrichales; Methanotrichaceae; Methanothrix	Methanothrix	provirus	65885		2	1	non-gut
vir291	3300013137.a@Ga0172375_10000208		10.1038/s41587-020-0718-6	virus	HK97	0	Methanosarcinales	Archaea; Euryarchaeota; Stenosarchaea group; Methanomicrobia; Methanosarcinales; Candidatus Methanoperedenaceae; Methanoperedens	Methanoperedens nitroreducens	unknown	92375		3	2	non-gut
vir292	3300021541.a@Ga0214529_10004@130000-184000		10.1038/s41587-020-0718-6	virus	HK97	4	Methanobacteriales	Archaea; Euryarchaeota; Methanomada group; Methanobacteria; Methanobacteriales; Methanobacteriaceae; Methanobrevibacter	Methanobrevibacter	provirus (complete)	42502		4	3	gut
vir295	3300027373.a@Ga0209016_1000038@20880-68097		10.1038/s41587-020-0718-6	virus	HK97	0	Methanomicrobiales	Archaea; Euryarchaeota; Stenosarchaea group; Methanomicrobia; Methanomicrobiales; Methanoregulaceae; Methanoregula	Methanoregula	provirus	47218		2	1	non-gut
vir296	3300027419.a@Ga0209340_1000177@23359-38391		10.1038/s41587-020-0718-6	virus	HK97	0	Methanosarcinales	Archaea; Euryarchaeota; Stenosarchaea group; Methanomicrobia; Methanotrichales; Methanotrichaceae; Methanothrix	Methanothrix	provirus	15033		0	0	non-gut
vir297	3300028601.a@Ga0265295_1000380@20430-72288		10.1038/s41587-020-0718-6	virus	HK97	1	Methanosarcinales	Archaea; Euryarchaeota; Stenosarchaea group; Methanomicrobia; Methanosarcinales; Methanosarcinaceae; Methanomethylovorans	Methanomethylovorans	provirus	51859		0	0	non-gut
vir298	3300028603.a@Ga0265293_10010960		10.1038/s41587-020-0718-6	virus	HK97	4	Methanosarcinales	Archaea; Euryarchaeota; Stenosarchaea group; Methanomicrobia; Methanotrichales; Methanotrichaceae; Methanothrix	Methanothrix	unknown	12501		0	0	non-gut
vir302	3300029775.a@Ga0134843_1000443		10.1038/s41587-020-0718-6	virus	HK97	67	Methanosarcinales	Archaea; Euryarchaeota; Stenosarchaea group; Methanomicrobia; Methanosarcinales; Methanosarcinaceae; Methanosarcina	Methanosarcina	unknown	51036		0	0	non-gut
vir303	3300029798.a@Ga0239581_1000090@39000-82476		10.1038/s41587-020-0718-6	virus	HK97	0	Methanosarcinales	Archaea; Euryarchaeota; Stenosarchaea group; Methanomicrobia; Methanotrichales; Methanotrichaceae; Methanothrix	Methanothrix	provirus	43477		4	1	non-gut
vir305	3300029825.a@Ga0134835_1000148@6000-52000		10.1038/s41587-020-0718-6	virus	HK97	7	Methanobacteriales	Archaea; Euryarchaeota; Methanomada group; Methanobacteria; Methanobacteriales; Methanobacteriaceae; Methanobacterium	Methanobacterium	provirus (complete)	42230		0	0	non-gut
vir306	DEEP_DOM17A_MAG_00061_000000000085		DOM	virus	HK97	0	Methanosarcinales	Archaea; Euryarchaeota; Stenosarchaea group; Methanomicrobia; Methanosarcinales	Methanosarcinales	unknown	46279		5	2	non-gut
vir307	G35_3_bin.39NODE_74@98705-112902		CHE	virus	HK97	0	Methanosarcinales	Archaea; Euryarchaeota; Stenosarchaea group; Methanomicrobia; Methanotrichales; Methanotrichaceae; Methanothrix	Methanothrix	provirus	14198		0	0	non-gut
vir309	JAENYT010000001.1@253464-292197		GenBank	virus	HK97	0	Methanomicrobiales	Archaea;Euryarchaeota;Methanomicrobia;Methanomicrobiales	Methanomicrobiales	provirus	38734		3	2	non-gut
vir310	JAHKLT010000048.1		GenBank	virus	HK97	0	Methanobacteriales	Archaea; Euryarchaeota; Methanomada group; Methanobacteria; Methanobacteriales; Methanobacteriaceae; Methanobrevibacter	Methanobrevibacter	unknown	38531		18	6	gut
vir311	3300025706.a@Ga0209507_1000560		10.1038/s41587-020-0718-6	virus	HK97	1	Methanomicrobiales	Archaea; Euryarchaeota; Stenosarchaea group; Methanomicrobia; Methanomicrobiales; Methanomicrobiaceae; Methanoculleus	Methanoculleus	unknown	39271		6	3	non-gut
vir312	S7_bin36_000000000016		DON	virus	HK97	0	Methanosarcinales	Archaea; Euryarchaeota; Stenosarchaea group; Methanomicrobia; Methanosarcinales	Methanovorans ANME-3	extrachromosomal	50421		14	3	non-gut
vir313	3300027276.a@Ga0208297_1000001@240445-267445		10.1038/s41587-020-0718-6	virus	DJR	10	Methanomicrobiales	Archaea; Euryarchaeota; Stenosarchaea group; Methanomicrobia; Methanomicrobiales; Methanomicrobiaceae; Methanoculleus	Methanoculleus	provirus	27001		0	0	gut
vir315	CAJYDL010000001.1@2306045-2352929		GenBank	virus	HK97	0	Methanosarcinales	Archaea; Euryarchaeota; Stenosarchaea group; Methanomicrobia; Methanotrichales; Methanotrichaceae; Methanothrix	Methanothrix	unknown	46885		1	1	non-gut
vir320	3300011965.a@Ga0119875_100607		10.1038/s41587-020-0718-6	plasmid	no	14	Methanosarcinales	Archaea; Euryarchaeota; Stenosarchaea group; Methanomicrobia; Methanosarcinales; Methanosarcinaceae; Methanosarcina	Methanosarcina	extrachromosomal	11271		0	0	non-gut
vir321	3300013290.a@Ga0172517_100562		10.1038/s41587-020-0718-6	plasmid	no	0	Methanosarcinales	Archaea; Euryarchaeota; Stenosarchaea group; Methanomicrobia; Methanotrichales; Methanotrichaceae; Methanosaeta	Methanosaeta	extrachromosomal	13084		0	0	non-gut
vir322	3300013886.a@Ga0181296_100324		10.1038/s41587-020-0718-6	plasmid	no	0	Methanosarcinales	Archaea; Euryarchaeota; Stenosarchaea group; Methanomicrobia; Methanosarcinales; Methanosarcinales incertae sedis; ANME-2	ANME-2	extrachromosomal	13518		0	0	non-gut
vir323	3300021541.a@Ga0214529_10033		10.1038/s41587-020-0718-6	virus	HK97	0	Methanobacteriales	Archaea; Euryarchaeota; Methanomada group; Methanobacteria; Methanobacteriales; Methanobacteriaceae; Methanobrevibacter	Methanobrevibacter	extrachromosomal	34306		0	0	gut
vir324	3300025393.a@Ga0208041_1001616		10.1038/s41587-020-0718-6	plasmid	no	2	Methanomicrobiales	Archaea; Euryarchaeota; Stenosarchaea group; Methanomicrobia; Methanomicrobiales; Methanomicrobiaceae; Methanoculleus	Methanoculleus	extrachromosomal	13994		0	0	non-gut
vir325	3300025737.a@Ga0208694_1004320		10.1038/s41587-020-0718-6	plasmid	no	0	Methanosarcinales	Archaea; Euryarchaeota; Stenosarchaea group; Methanomicrobia; Methanotrichales; Methanotrichaceae; Methanosaeta	Methanosaeta	extrachromosomal	12968		0	0	non-gut
vir326	3300027419.a@Ga0209340_1000417		10.1038/s41587-020-0718-6	virus	HK97	7	Methanobacteriales	Archaea; Euryarchaeota; Methanomada group; Methanobacteria; Methanobacteriales; Methanobacteriaceae; Methanobacterium	Methanobacterium	extrachromosomal	46593		1	1	non-gut
vir327	3300027863.a@Ga0207433_10004970		10.1038/s41587-020-0718-6	plasmid	no	0	Korarchaeota	Archaea; TACK group; Candidatus Korarchaeota; Methanodesulfokores	Methanodesulfokores	extrachromosomal	24077		0	0	non-gut
vir328	3300028622.a@Ga0302253_1000727		10.1038/s41587-020-0718-6	plasmid	no	0	Methanosarcinales	Archaea; Euryarchaeota; Stenosarchaea group; Methanomicrobia; Methanotrichales; Methanotrichaceae; Methanosaeta	Methanosaeta	extrachromosomal	24447		0	0	non-gut
vir329	3300028627.a@Ga0302243_1006842		10.1038/s41587-020-0718-6	plasmid	no	0	Methanomicrobiales	Archaea; Euryarchaeota; Stenosarchaea group; Methanomicrobia; Methanomicrobiales; Methanomicrobiaceae; Methanoculleus	Methanoculleus	extrachromosomal	4634		0	0	non-gut
vir330	3300029202.a@Ga0167843_100646		10.1038/s41587-020-0718-6	plasmid	no	0	Methanosarcinales	Archaea; Euryarchaeota; Stenosarchaea group; Methanomicrobia; Methanosarcinales; Methanosarcinaceae; Methanolobus	Methanolobus	extrachromosomal	9969		0	0	non-gut
vir331	3300029202.a@Ga0167843_100320		10.1038/s41587-020-0718-6	plasmid	no	1	Methanosarcinales	Archaea; Euryarchaeota; Stenosarchaea group; Methanomicrobia; Methanosarcinales; Methanosarcinaceae; Methanosarcina	Methanosarcina mazei	extrachromosomal	14165		0	0	non-gut
vir332	3300029202.a@Ga0167843_100396		10.1038/s41587-020-0718-6	plasmid	no	0	Methanosarcinales	Archaea; Euryarchaeota; Stenosarchaea group; Methanomicrobia; Methanosarcinales; Methanosarcinaceae; Methanosarcina	Methanosarcina	extrachromosomal	12664		0	0	non-gut
vir333	3300029397.a@Ga0243510_100595		10.1038/s41587-020-0718-6	plasmid	no	0	Methanosarcinales	Archaea; Euryarchaeota; Stenosarchaea group; Methanomicrobia; Methanosarcinales; Methanosarcinaceae; Methanosarcina	Methanosarcina	extrachromosomal	19318		1	1	non-gut
vir335	Ga0116649_1000043		IMG/VR	virus	HK97	0	Methanomassiliicoccales	Archaea; Candidatus Thermoplasmatota; Thermoplasmata; Methanomassiliicoccales; Candidatus Methanomethylophilaceae; Candidatus Methanomethylophilus; unclassified Candidatus Methanomethylophilus	Methanomethylophilaceae UBA71	extrachromosomal	83147		0	0	gut
vir336	CADCEP010000002.1@10312-53542		GenBank	virus	HK97	0	Methanobacteriales	Archaea; Euryarchaeota; Methanomada group; Methanobacteria; Methanobacteriales; Methanobacteriaceae; Methanobrevibacter	Methanobrevibacter	provirus (complete)	43231		5	3	gut
vir337	DANR01000010.1@50905-109174		GenBank	virus	HK97	0	Methanobacteriales	Archaea; Euryarchaeota; Methanomada group; Methanobacteria; Methanobacteriales; Methanobacteriaceae	Methanobacteriaceae	provirus (incomplete)	58269		18	4	gut
vir339	JAFRMD010000120.1		GenBank	virus	HK97	1	Methanobacteriales	Archaea; Euryarchaeota; Methanomada group; Methanobacteria; Methanobacteriales; Methanobacteriaceae; Methanosphaera	Methanosphaera	unknown	158079		16	5	gut
vir340	JAFRFD010000004.1@17112-57968		GenBank	virus	HK97	0	Methanobacteriales	Archaea; Euryarchaeota; Methanomada group; Methanobacteria; Methanobacteriales; Methanobacteriaceae; Methanobrevibacter	Methanobrevibacter	provirus (complete)	40856		8	3	gut
vir341	SRR6824202_SpadScaf_Metabat_bin78_74689_30		this study	virus	HK97	0	Methanomassiliicoccales	Archaea; Candidatus Thermoplasmatota; Thermoplasmata; Methanomassiliicoccales		unknown	74689	yes	0	0	gut
vir344	LMVN01000011.1@160521-185680		GenBank	virus	HK97	0	Methanobacteriales	Archaea; Euryarchaeota; Methanomada group; Methanobacteria; Methanobacteriales; Methanobacteriaceae; Methanosphaera	Methanosphaera cuniculi strain 1R-7	provirus (incomplete)	25159		0	0	non-gut
vir346	DAYV01000004.1@48154-98871		GenBank	virus	HK97	0	Methanobacteriales	Archaea; Euryarchaeota; Methanomada group; Methanobacteria; Methanobacteriales; Methanobacteriaceae; Methanobacterium	Methanobacterium sp.	provirus (complete)	50718		1	1	non-gut
vir349	NC_002628.3	psiM100	GenBank	virus	HK97	0	Methanobacteriales	Archaea; Euryarchaeota; Methanomada group; Methanobacteria; Methanobacteriales; Methanobacteriaceae; Methanothermobacter	Methanothermobacter wolfeii	provirus (complete)	31007		0	0	non-gut
vir350	MK994522.1	phiF1	GenBank	virus	HK97	0	Methanobacteriales	Archaea; Euryarchaeota; Methanomada group; Methanobacteria; Methanobacteriales; Methanobacteriaceae; Methanobacterium	Methanobacterium	extrachromosomal	73979		0	0	non-gut
vir351	MN737622.1	phiF3	GenBank	virus	HK97	0	Methanobacteriales	Archaea; Euryarchaeota; Methanomada group; Methanobacteria; Methanobacteriales; Methanobacteriaceae; Methanobacterium	Methanobacterium	extrachromosomal	32524		0	0	non-gut
vir352	MT711370.1	MFTV1	GenBank	virus	HK97	0	Methanococcales	Archaea; Euryarchaeota; Methanomada group; Methanococci; Methanococcales		extrachromosomal	31202		0	0	non-gut
vir353	OW444198.1	C158	10.1111/1462-2920.16120	virus	HK97	0	Methanobacteriales	Archaea; Euryarchaeota; Methanomada group; Methanobacteria; Methanobacteriales; Methanobacteriaceae; Methanobacterium	Methanobacterium	extrachromosomal	42490		0	0	non-gut
vir354	OW444242.1	C889	10.1111/1462-2920.16120	virus	HK97	0	Methanomicrobiales	Archaea;Euryarchaeota;Methanomicrobia;Methanomicrobiales		unknown	14120		0	0	non-gut
vir355	OW444197.1	C1359	10.1111/1462-2920.16120	virus	spindle	0	Methanogen	Archaea		unknown	9936		2	1	non-gut
vir356	OW444339.1	C1697	10.1111/1462-2920.16120	virus	spindle	0	Methanosarcinales	Archaea; Euryarchaeota; Stenosarchaea group; Methanomicrobia; Methanosarcinales		unknown	8207		0	0	non-gut
vir357	JACCQJ010000002.1@338049-352104		GenBank	virus	DJR	0	Methanococcales	Archaea; Euryarchaeota; Methanomada group; Methanococci; Methanococcales; Methanococcaceae; Methanococcus	Methanococcus	provirus	14055		0	0	non-gut
vir358	VEPN01000016.1@43681-61404		GenBank	virus	DJR	0	Methanosarcinales	Archaea; Euryarchaeota; Stenosarchaea group; Methanomicrobia; Methanosarcinales; Candidatus Methanoperedenaceae; Methanoperedens	Methanoperedens sp	provirus	17723		0	0	non-gut
vir359	KP703175.1	ANMV-1	GenBank	virus	HK97	0	Methanosarcinales	Archaea; Euryarchaeota; Stenosarchaea group; Methanomicrobia; Methanosarcinales		extrachromosomal	38465	yes	0	0	non-gut
vir360	JAHDPF010000177.1		GenBank	plasmid	no	2	Methanosarcinales	Archaea; Euryarchaeota; Stenosarchaea group; Methanomicrobia; Methanotrichales; Methanotrichaceae; Methanothrix	Methanothrix	circular	12611		0	0	non-gut
vir361	CACXMP010000002.1		10.1038/s41587-019-0202-3	virus	HK97	11	Methanobacteriales	Archaea; Euryarchaeota; Methanomada group; Methanobacteria; Methanobacteriales; Methanobacteriaceae; Methanobrevibacter	Methanobrevibacter	circular	76696		17	5	gut
vir362	CADBWM010000004.1@18859-57497		GenBank	virus	HK97	2	Methanobacteriales	Archaea; Euryarchaeota; Methanomada group; Methanobacteria; Methanobacteriales; Methanobacteriaceae; Methanobrevibacter	Methanobrevibacter	provirus (complete)	38639		5	3	gut
vir363	GUT_GENOME236144_1		10.1038/s41587-020-0603-3	plasmid	no	0	Methanobacteriales	Archaea; Euryarchaeota; Methanomada group; Methanobacteria; Methanobacteriales		circular	6299		0	0	gut
vir364	DAJF01000013.1@58335-98291		GenBank	virus	HK97	10	Methanobacteriales	Archaea; Euryarchaeota; Methanomada group; Methanobacteria; Methanobacteriales; Methanobacteriaceae; Methanobrevibacter	Methanobrevibacter	provirus (complete)	39956		21	4	non-gut
vir366	GUT_GENOME264551_9		10.1038/s41587-020-0603-3	plasmid	no	0	Methanobacteriales	Archaea; Euryarchaeota; Methanomada group; Methanobacteria; Methanobacteriales		circular	75504		18	3	gut
vir367	JAFUIW010000028.1		GenBank	virus	HK97	0	Methanobacteriales	Archaea; Euryarchaeota; Methanomada group; Methanobacteria; Methanobacteriales		unknown	47513		4	2	gut
vir368	CACZOU010000058.1		GenBank	virus	HK97	1	Methanobacteriales	Archaea; Euryarchaeota; Methanomada group; Methanobacteria; Methanobacteriales; Methanobacteriaceae; Methanobrevibacter	Methanobrevibacter	unknown	37364		0	0	gut
vir369	JAFRSC010000016.1@1-54910		GenBank	virus	HK97	0	Methanobacteriales	Archaea; Euryarchaeota; Methanomada group; Methanobacteria; Methanobacteriales		provirus (incomplete)	54910		3	1	gut
vir372	CACWVY010000014.1@93752-146228		GenBank	virus	HK97	0	Methanobacteriales	Archaea; Euryarchaeota; Methanomada group; Methanobacteria; Methanobacteriales; Methanobacteriaceae; Methanobrevibacter	Methanobrevibacter	provirus (incomplete)	52476		0	0	gut
vir373	3300029397.a@Ga0243510_100942		10.1038/s41587-020-0718-6	plasmid	no	0	Methanosarcinales	Archaea; Euryarchaeota; Stenosarchaea group; Methanomicrobia; Methanosarcinales		circular	13282		0	0	non-gut
vir374	AB_69_Bin_24__342		DEA	virus	HK97	0	Methanosarcinales	Archaea; Euryarchaeota; Stenosarchaea group; Methanomicrobia; Methanosarcinales	Methanovorans ANME-3	circular	62984		2	2	non-gut
vir375	DAZJ01000079.1@1-36810		GenBank	virus	HK97	5	Methanosarcinales	Archaea; Euryarchaeota; Stenosarchaea group; Methanomicrobia; Methanotrichales; Methanotrichaceae; Methanosaeta	Methanosaeta	provirus	36810	yes	0	0	non-gut
vir377	206_Spad_Metabat_bin64_62538_37@1-12467		this study	virus	HK97	0	Methanosarcinales	Archaea; Euryarchaeota; Stenosarchaea group; Methanomicrobia; Methanosarcinales	Methanosarcinales	unknown	12467		0	0	gut
vir379	3300018018.a@Ga0187886_1001484		10.1038/s41587-020-0718-6	virus	DJR	0	Methanomicrobiales	Archaea; Euryarchaeota; Stenosarchaea group; Methanomicrobia; Methanomicrobiales	Methanomicrobiales	circular	21203		0	0	non-gut
vir380	CAILJG010000389.1		GenBank	virus	HK97	0	Methanosarcinales	Archaea; Euryarchaeota; Stenosarchaea group; Methanomicrobia; Methanosarcinales	Methanosarcinales	unknown	14172		4	1	non-gut
vir381	DARW01000066.1@1-34722		GenBank	virus	HK97	0	Methanomassiliicoccales	Archaea; Candidatus Thermoplasmatota; Thermoplasmata; Methanomassiliicoccales	Methanomassiliicoccales	provirus	34722		0	0	non-gut
vir382	CADCFK010000016.1@64647-86696		GenBank	virus	HK97	2	Methanobacteriales	Archaea; Euryarchaeota; Methanomada group; Methanobacteria; Methanobacteriales; Methanobacteriaceae; Methanobrevibacter	Methanobrevibacter	provirus (incomlpete)	22049		1	1	gut
vir383	JAGCAI010000558.1		GenBank	virus	HK97	0	Methanomassiliicoccales	Archaea; Candidatus Thermoplasmatota; Thermoplasmata; Methanomassiliicoccales	Methanomassiliicoccales	unknown	34989		0	0	gut
vir384	MVRK01000019.1		10.1111/1462-2920.13922	virus	HK97	0	Methanosarcinales	Archaea; Euryarchaeota; Stenosarchaea group; Methanomicrobia; Methanosarcinales	Methanosarcinales	circular	53891	yes	0	0	non-gut
vir385	CACZTX010000001.1@92545-139386		GenBank	virus	HK97	1	Methanobacteriales	Archaea; Euryarchaeota; Methanomada group; Methanobacteria; Methanobacteriales; Methanobacteriaceae; Methanobrevibacter	Methanobrevibacter	provirus (complete)	46842		11	3	gut
vir387	3300027373.a@Ga0209016_1000015@288453-351405		10.1038/s41587-020-0718-6	virus	HK97	0	Methanomicrobiales	Archaea; Euryarchaeota; Stenosarchaea group; Methanomicrobia; Methanomicrobiales; Methanospirillaceae; Methanospirillum	Methanospirillum	provirus	62952		0	0	non-gut
vir388	CACWTF010000007.1		GenBank	plasmid	no	0	Methanomassiliicoccales	Archaea; Candidatus Thermoplasmatota; Thermoplasmata; Methanomassiliicoccales	Methanomassiliicoccales	circular	31622		0	0	gut
vir389	3300027419.a@Ga0209340_1000038@8888-49116		10.1038/s41587-020-0718-6	virus	HK97	0	Methanosarcinales	Archaea; Euryarchaeota; Stenosarchaea group; Methanomicrobia; Methanosarcinales	Methanosarcinales	provirus	40228		0	0	non-gut
vir392	CACXMP010000001.1		GenBank	virus	HK97	0	Methanobacteriales	Archaea; Euryarchaeota; Methanomada group; Methanobacteria; Methanobacteriales	Methanobacteriales	unknown	157671		38	8	gut
vir393	CAIYAF010000127.1		GenBank	virus	HK97	0	Methanomicrobiales	Archaea; Euryarchaeota; Stenosarchaea group; Methanomicrobia; Methanomicrobiales	Methanomicrobiales	unknown	36718		2	1	non-gut
vir394	JAIPRP010000001.1@1354223-1387360		GenBank	virus	HK97	1	Methanobacteriales	Archaea; Euryarchaeota; Methanomada group; Methanobacteria; Methanobacteriales; Methanobacteriaceae; Methanobacterium	Methanobacterium paludis	provirus (incomplete)	33137		1	1	non-gut
vir395	JADIIL010000014.1@32030-72843		GenBank	virus	HK97	36	Methanobacteriales	Archaea; Euryarchaeota; Methanomada group; Methanobacteria; Methanobacteriales; Methanobacteriaceae; Methanobacterium	Methanobacterium formicicum	provirus (complete)	40813		0	0	non-gut
vir396	GUT_GENOME103957_15		10.1038/s41587-020-0603-3	virus	HK97	0	Methanomassiliicoccales	Archaea; Candidatus Thermoplasmatota; Thermoplasmata; Methanomassiliicoccales	Methanomassiliicoccales	unknown	31108	yes	0	0	gut
vir398	JAFUBV010000001.1		GenBank	virus	HK97	2	Methanobacteriales	Archaea; Euryarchaeota; Methanomada group; Methanobacteria; Methanobacteriales; Methanobacteriaceae; Methanobrevibacter	Methanobrevibacter	unknown	130604		16	6	gut
vir399	JAGCLR010000143.1		GenBank	virus	HK97	0	Methanobacteriales	Archaea; Euryarchaeota; Methanomada group; Methanobacteria; Methanobacteriales; Methanobacteriaceae; Methanobrevibacter	Methanobrevibacter	unknown	62397		36	6	gut
vir400	3300027510.a@Ga0209537_1019505		10.1038/s41587-020-0718-6	plasmid	no	2	Methanomicrobiales	Archaea; Euryarchaeota; Stenosarchaea group; Methanomicrobia; Methanomicrobiales; Methanomicrobiaceae; Methanoculleus	Methanoculleus	circular	3213		0	0	non-gut
vir401	JAFRKE010000032.1		GenBank	virus	HK97	1	Methanobacteriales	Archaea; Euryarchaeota; Methanomada group; Methanobacteria; Methanobacteriales; Methanobacteriaceae; Methanobrevibacter	Methanobrevibacter sp.	unknown	47128		2	1	gut
vir402	JAFOOT010000081.1		GenBank	virus	HK97	0	Methanomassiliicoccales	Archaea; Candidatus Thermoplasmatota; Thermoplasmata; Methanomassiliicoccales	Methanomassiliicoccales	unknown	29068		0	0	gut
vir403	JAFQXD010000016.1@5472-54453		GenBank	virus	HK97	0	Methanobacteriales	Archaea; Euryarchaeota; Methanomada group; Methanobacteria; Methanobacteriales; Methanobacteriaceae; Methanobrevibacter	Methanobrevibacter	provirus (complete)	48981		13	3	gut
vir405	JAFQSO010000013.1@1-39480		GenBank	virus	HK97	0	Methanobacteriales	Archaea; Euryarchaeota; Methanomada group; Methanobacteria; Methanobacteriales; Methanobacteriaceae; Methanobrevibacter	Methanobrevibacter	provirus (incomplete)	39480		0	0	gut
vir406	CADAJR010000024.1@18886-57107		GenBank	virus	HK97	0	Methanobacteriales	Archaea; Euryarchaeota; Methanomada group; Methanobacteria; Methanobacteriales; Methanobacteriaceae; Methanobrevibacter	Methanobrevibacter	provirus (complete)	38222		14	5	gut
vir408	3300029821.a@Ga0246092_1000668		10.1038/s41587-020-0718-6	virus	HK97	0	Methanosarcinales	Archaea; Euryarchaeota; Stenosarchaea group; Methanomicrobia; Methanosarcinales; Candidatus Methanoperedenaceae	ANME-2d	unknown	49921		6	2	non-gut
vir409	GUT_GENOME206223_8@49986-84439		10.1038/s41587-020-0603-3	virus	HK97	202	Methanobacteriales	Archaea; Euryarchaeota; Methanomada group; Methanobacteria; Methanobacteriales; Methanobacteriaceae; Methanobrevibacter	Methanobrevibacter sm	provirus (incomplete)	34453		3	2	gut
vir410	JAFSLI010000029.1		GenBank	virus	HK97	0	Methanobacteriales	Archaea; Euryarchaeota; Methanomada group; Methanobacteria; Methanobacteriales; Methanobacteriaceae; Methanobrevibacter	Methanobrevibacter	unknown	46740		5	2	gut
vir411	JAFUHT010000036.1		GenBank	virus	HK97	0	Methanobacteriales	Archaea; Euryarchaeota; Methanomada group; Methanobacteria; Methanobacteriales; Methanobacteriaceae; Methanobrevibacter	Methanobrevibacter	unknown	52132		6	2	gut
vir412	JAGGMN010000002.1		GenBank	plasmid	no	9	Methanomicrobiales	Archaea; Euryarchaeota; Stenosarchaea group; Methanomicrobia; Methanomicrobiales; Methanomicrobiaceae; Methanofollis	Methanofollis	circular	37497		5	1	non-gut
vir413	CACZUM010000001.1@28190-110720		GenBank	virus	HK97	0	Methanobacteriales	Archaea; Euryarchaeota; Methanomada group; Methanobacteria; Methanobacteriales; Methanobacteriaceae; Methanobrevibacter	Methanobrevibacter	provirus (complete)	82530		3	2	gut
vir414	LT985084.1		GenBank	plasmid	no	0	Methanobacteriales	Archaea; Euryarchaeota; Methanomada group; Methanobacteria; Methanobacteriales; Methanobacteriaceae; Methanobrevibacter	Methanobrevibacter oralis	circular	117844		26	4	gut
vir415	JAFQXD010000029.1		GenBank	virus	HK97	2	Methanobacteriales	Archaea; Euryarchaeota; Methanomada group; Methanobacteria; Methanobacteriales; Methanobacteriaceae; Methanobrevibacter	Methanobrevibacter	unknown	59401		15	5	gut
vir416	CADBWM010000001.1		10.1038/s41587-019-0202-3	virus	HK97	2	Methanobacteriales	Archaea; Euryarchaeota; Methanomada group; Methanobacteria; Methanobacteriales; Methanobacteriaceae; Methanobrevibacter	Methanobrevibacter	circular	228125		10	5	gut
vir417	3300029202.a@Ga0167843_100442		10.1038/s41587-020-0718-6	plasmid	no	4	Methanosarcinales	Archaea; Euryarchaeota; Stenosarchaea group; Methanomicrobia; Methanosarcinales; Methanosarcinaceae; Methanosarcina	Methanosarcina	circular	11893		0	0	non-gut
vir418	JAFRFB010000013.1@60372-110032		GenBank	virus	HK97	2	Methanobacteriales	Archaea; Euryarchaeota; Methanomada group; Methanobacteria; Methanobacteriales; Methanobacteriaceae; Methanobrevibacter	Methanobrevibacter	provirus (complete)	49660		3	2	gut
vir419	CAIXUQ010000117.1		GenBank	plasmid	no	0	Methanosarcinales	Archaea; Euryarchaeota; Stenosarchaea group; Methanomicrobia; Methanotrichales; Methanotrichaceae; Methanosaeta	Methanosaeta	circular	13468		0	0	non-gut
vir420	uvig_545215@1-50913		10.1016/j.cell.2021.01.029	virus	HK97	151	Methanobacteriales	Archaea; Euryarchaeota; Methanomada group; Methanobacteria; Methanobacteriales; Methanobacteriaceae; Methanobrevibacter	Methanobrevibacter smithii	unknown	50913		7	3	gut
vir421	NC_001902.1	psiM2	GenBank	virus	HK97	0	Methanobacteriales	Archaea; Euryarchaeota; Methanomada group; Methanobacteria; Methanobacteriales; Methanobacteriaceae; Methanothermobacter	Methanothermobacter	circular	26111		0	0	non-gut
vir422	CP005934.1@1790805-1802528		GenBank	virus	VP4	2	Methanomassiliicoccales	Archaea; Candidatus Thermoplasmatota; Thermoplasmata; Methanomassiliicoccales; Methanomassiliicoccaceae; Methanomassiliicoccus	Methanomassiliicoccus	provirus	11723		5	1	gut
vir423	CP005934.1@1659616-1681748		GenBank	virus	VP4	0	Methanomassiliicoccales	Archaea; Candidatus Thermoplasmatota; Thermoplasmata; Methanomassiliicoccales; Methanomassiliicoccaceae; Methanomassiliicoccus	Methanomassiliicoccus	provirus	22132		4	1	gut
vir424	CP005934.1@71166-83218		GenBank	virus	VP4	0	Methanomassiliicoccales	Archaea; Candidatus Thermoplasmatota; Thermoplasmata; Methanomassiliicoccales; Methanomassiliicoccaceae; Methanomassiliicoccus	Methanomassiliicoccus	provirus	12052		2	1	gut
vir425	CP005934.1@965684-996699		GenBank	virus	VP4	0	Methanomassiliicoccales	Archaea; Candidatus Thermoplasmatota; Thermoplasmata; Methanomassiliicoccales; Methanomassiliicoccaceae; Methanomassiliicoccus	Methanomassiliicoccus	provirus	31015		12	4	gut
vir426	CAJKXZ010000002.1@54213-67645		GenBank	virus	VP4	0	Methanomassiliicoccales	Archaea; Candidatus Thermoplasmatota; Thermoplasmata; Methanomassiliicoccales; Methanomassiliicoccaceae; Methanomassiliicoccus	Methanomassiliicoccus	provirus	13432		0	0	gut
vir427	163_Spad_Metabat2_bin216_125083_0@36764-58549		this study	virus	VP4	0	Methanomassiliicoccales	Archaea; Candidatus Thermoplasmatota; Thermoplasmata; Methanomassiliicoccales	Methanomassiliicoccales	provirus	21785	yes	8	2	gut
vir428	GUT_GENOME102627_2@157178-172296		10.1038/s41587-020-0603-3	virus	VP4	3	Methanomassiliicoccales	Archaea; Candidatus Thermoplasmatota; Thermoplasmata; Methanomassiliicoccales; Methanomassiliicoccaceae; Methanomassiliicoccus	Methanomassiliicoccus	provirus	15118		4	1	gut
vir429	GUT_GENOME283638_1@16458-37281		10.1038/s41587-020-0603-3	virus	VP4	0	Methanomassiliicoccales	Archaea; Candidatus Thermoplasmatota; Thermoplasmata; Methanomassiliicoccales; Methanomethylophilaceae; Methanomethylophilus	Methanomethylophilus	provirus	20823		5	2	gut
vir430	LVVR01000001.1@1202597-1241350		GenBank	virus	VP4	0	Methanomassiliicoccales	Archaea; Candidatus Thermoplasmatota; Thermoplasmata; Methanomassiliicoccales; Methanomethylophilaceae	Methanomethylophilaceae	provirus	38753		11	3	gut
vir431	CP047880.1@1131618-1162542		GenBank	virus	VP4	0	Methanomassiliicoccales	Archaea; Candidatus Thermoplasmatota; Thermoplasmata; Methanomassiliicoccales; Methanomethylophilaceae	Methanomethylophilaceae	provirus	30924		17	3	gut
vir432	CAJE01000019.1@44478-58266		GenBank	virus	VP4	0	Methanomassiliicoccales	Archaea; Candidatus Thermoplasmatota; Thermoplasmata; Methanomassiliicoccales; Methanomassiliicoccaceae; Methanomassiliicoccus	Methanomassiliicoccus	provirus	13788		0	0	gut
vir433	JAFXWE010000240.1@4288-42989		GenBank	virus	VP4	0	Methanomassiliicoccales	Archaea; Candidatus Thermoplasmatota; Thermoplasmata; Methanomassiliicoccales; Methanomethylophilaceae	Methanomethylophilaceae	provirus	38701		16	4	gut
vir434	CAJLZK010000001.1@107524-126497		GenBank	virus	VP4	0	Methanomassiliicoccales	Archaea; Candidatus Thermoplasmatota; Thermoplasmata; Methanomassiliicoccales; Methanomassiliicoccaceae; Methanomassiliicoccus	Methanomassiliicoccus	provirus	18973		4	1	gut
vir435	DAQS01000002.1@225275-243083		GenBank	virus	VP4	0	Methanomassiliicoccales	Archaea; Candidatus Thermoplasmatota; Thermoplasmata; Methanomassiliicoccales	Methanomassiliicoccales	provirus	17808		6	3	non-gut
vir436	LJKK01000055.1@70198-97272		GenBank	virus	VP4	0	Methanomassiliicoccales	Archaea; Candidatus Thermoplasmatota; Thermoplasmata; Methanomassiliicoccales; Methanomassiliicoccaceae	Methanomassiliicoccaceae	provirus	27074		9	3	gut
vir437	DAUY01000016.1@135574-175632		GenBank	virus	VP4	0	Methanomassiliicoccales	Archaea; Candidatus Thermoplasmatota; Thermoplasmata; Methanomassiliicoccales; Methanomassiliicoccaceae	Methanomassiliicoccaceae	provirus	40058		12	4	non-gut
vir438	LOPS01000042.1@57478-77816		GenBank	virus	VP4	0	Methanomassiliicoccales	Archaea; Candidatus Thermoplasmatota; Thermoplasmata; Methanomassiliicoccales; Methanomethylophilaceae; Methanomethylophilus	Methanomethylophilus	provirus	20338		5	2	gut
vir439	163_Spad_Metabat2_bin249_32554_13@9016-32517		this study	virus	VP4	0	Methanomassiliicoccales	Archaea; Candidatus Thermoplasmatota; Thermoplasmata; Methanomassiliicoccales	Methanomassiliicoccales	provirus	23501	yes	0	0	gut
vir440	SRR11880825_Spad_Metabat2_bin88_42069_2@14299-32480		this study	virus	VP4	0	Methanomassiliicoccales	Archaea; Candidatus Thermoplasmatota; Thermoplasmata; Methanomassiliicoccales	Methanomassiliicoccales	provirus	18181		8	3	gut
vir441	144b144_SpadScaf_Metabat2_bin145_50574_0@16334-33808		this study	virus	VP4	0	Methanomassiliicoccales	Archaea; Candidatus Thermoplasmatota; Thermoplasmata; Methanomassiliicoccales	Methanomassiliicoccales	provirus	17474		0	0	gut
vir442	GUT_GENOME187666_3@101401-165340		10.1038/s41587-020-0603-3	virus	VP4	0	Methanomassiliicoccales	Archaea; Candidatus Thermoplasmatota; Thermoplasmata; Methanomassiliicoccales; Methanomethylophilaceae	Methanomethylophilaceae	provirus	63939		8	3	gut
vir443	GUT_GENOME155212_10@3-20249		10.1038/s41587-020-0603-3	virus	VP4	0	Methanomassiliicoccales	Archaea; Candidatus Thermoplasmatota; Thermoplasmata; Methanomassiliicoccales; Methanomethylophilaceae; Methanomethylophilus	Methanomethylophilus	provirus	20246		7	2	gut
vir444	3300021318_27:Ga0214506_1000257@69171-118231		10.1038/s41587-020-0718-6	virus	VP4	0	Methanomassiliicoccales	Archaea; Candidatus Thermoplasmatota; Thermoplasmata; Methanomassiliicoccales; Methanomethylophilaceae	Methanomethylophilaceae	provirus	49060		14	4	gut
vir445	3300029928_14:Ga0116643_1000216@14427-46898		10.1038/s41587-020-0718-6	virus	VP4	0	Methanomassiliicoccales	Archaea; Candidatus Thermoplasmatota; Thermoplasmata; Methanomassiliicoccales; Methanomethylophilaceae	Methanomethylophilaceae	provirus	32471		17	5	gut
vir446	3300029928_14:Ga0116643_1000081@38152-50966		10.1038/s41587-020-0718-6	virus	VP4	0	Methanomassiliicoccales	Archaea; Candidatus Thermoplasmatota; Thermoplasmata; Methanomassiliicoccales; Methanomethylophilaceae	Methanomethylophilaceae	provirus	12814		6	1	gut
vir447	7000000193_13:SRS048870_WUGC_scaffold_42453		10.1038/s41587-020-0718-6	virus	VP4	0	Methanomassiliicoccales	Archaea; Candidatus Thermoplasmatota; Thermoplasmata; Methanomassiliicoccales; Methanomassiliicoccaceae; Methanomassiliicoccus	Methanomassiliicoccus	unknown	64893		9	3	gut
vir448	LVVT010000016.1		GenBank	virus	VP4	0	Methanomassiliicoccales	Archaea; Candidatus Thermoplasmatota; Thermoplasmata; Methanomassiliicoccales; Methanomassiliicoccaceae; Methanomassiliicoccus	Methanomassiliicoccus	unknown	19955		2	1	gut

## Sheet: TableS5-spacers_on_Smacoviridae
spacer_id	spacer host	Smacoviridae id	start	end	evalue	spacer	protospacer	identity	origin of smacovirises
animal_gut_Macaca7s_Megh_Metabat_bin303_16_Macaca7s_Megh_Metabat_bin303_Comp83_06_Conta2_52_contig245-k115_909492_flag_1_multi_12_0000_len_5221_1_9;size=1	Methanomethylophilaceae	gb|KU043396.1|	2011	1977	3.67e-10	CTTGGTCTCGTACGTCCATTTGTCGGAGCATTCTT	CTTGGTTTCGTATGTCCATTTGTCGGAGCATTCTT	0.942857	Macaca
animal_gut_SRR6824182_SpadScaf_Metabat_bin86_16_SRR6824182_SpadScaf_Metabat_bin86_Comp96_99_Conta0_00_contig123-NODE_1215_length_39085_cov_11_905816_1_12;size=1	Methanomethylophilaceae	gb|KJ577813.1|	1028	995	1.32e-09	TCTTGTAGGCCGGAGGGAGGAGGATCATCCCCAT	TCTTGTAGGCCGGAGGGAGCAGGATCATACCCAT	0.941176	Porcine
animal_gut_SRR6824182_SpadScaf_Metabat_bin86_16_SRR6824182_SpadScaf_Metabat_bin86_Comp96_99_Conta0_00_contig123-NODE_1215_length_39085_cov_11_905816_1_20;size=1	Methanomethylophilaceae	gb|MK796234.1|	81	114	2.21e-07	ATGCACTCCATAGATAACCTTCGGGGGTTA-CCT	ATACACTCCATAGATAACCCTCGGGGGTTATCCT	0.911765	Lynx
HGG_GUT_GENOME014213_GUT_GENOME014213_16_1_3;size=1	Methanomethylophilaceae UBA71	gb|KT600068.1|	1677	1644	1.32e-09	GGGATCAAGGTCATGGTAATGACGAACACCATGC	GGGGTCAAGGTCATGGTAATGACTAACACCATGC	0.941176	Human
HGG_GUT_GENOME014213_GUT_GENOME014213_48_1_3;size=1	Methanomethylophilaceae UBA71	gb|KT600068.1|	2024	1991	2.85e-06	AACAGGAAGTGGCCTTGCAAGCACTTA-GAGACAC	AACAGGAAGTGGCCTTACAGGC-CTTAAGAGACAC	0.911765	Human
HGG_GUT_GENOME022400_GUT_GENOME022400_20_1_5;size=1	Methanomethylophilaceae UBA71	gb|MH500283.1|	2412	2444	9.73e-06	TAAG-CTTGGCTATAATTTTCGCCATCACCGCGA	TAAGTCTT-GCTATAATTTTCGCGATTACCGCGA	0.909091	Human
HGG_GUT_GENOME102627_GUT_GENOME102627_1_2_10;size=1	Methanomassiliicoccus intestinalis	gb|KP264968.1|	1061	1028	6.73e-13	TAATTGTCATAATTATTAGTAAACATATCAGTAG	TAATTGTCATAATTATTAGTAAACATATCAGTAG	0.918919	Human
HGG_GUT_GENOME102627_GUT_GENOME102627_1_2_14;size=1	Methanomassiliicoccus intestinalis	gb|KP233179.1|	2368	2403	5.20e-14	TTCGCATCTTTCGTTTAACCATTTTTCTAAAATACT	TTCGCATCTTTCGTTTAACCATTTTTCTAAAATACT	0.972973	Human
HGG_GUT_GENOME102627_GUT_GENOME102627_1_2_19;size=1	Methanomassiliicoccus intestinalis	gb|KP264969.1|	2119	2084	4.96e-14	GAAACAAAACGACAGAGAAGTAGACTGTATTATAGA	GAAACAAAACGACAGAGAAGTAGACTGTATTATAGA	1	Human
HGG_GUT_GENOME215821_GUT_GENOME215821_25_2_1;size=2	Methanomassiliicoccus intestinalis	gb|KP233179.1|	149	185	1.46e-09	TACCTAGGTGGTGTTATTTCTGGTTATGATAAATGGA	TACCTAGGTGGTGTTATTAGTGGCTATGATAAATGGA	0.918919	Human
HGG_GUT_GENOME247406_GUT_GENOME247406_16_1_38;size=1	Methanomassiliicoccus intestinalis	gb|MG846351.1|	614	578	1.46e-09	GTCTCTATTGCTGTGTATAGTGCTTCATTCCATTTCC	GTCTCTATGGCTGTGTATAATGCTTCGTTCCATTTCC	0.918919	Chicken
HGG_GUT_GENOME247406_GUT_GENOME247406_16_1_40;size=1	Methanomassiliicoccus intestinalis	gb|KP233176.1|	2160	2126	1.69e-13	AGAGTTCAGACCGTGGCAGAGAGCCCTACTGGATC	AGAGTTCAGACCGTGGCAGAGAGCCCTACTGGATC	1	Human
IMG-bins_3300026549_87_3300026549_87:Ga0256404_1004134_1_46;size=2	Methanomethylophilus archaeon	gb|JN634851.1|	2122	2153	3.28e-10	TCTAACCAATTGGTGCTCTGGAATGCTGGTTC	TCTAACCAAGTGGTGCTCTGGAATGCTGGTTC	0.96875	Human
Methanomassiliicocci_GCA_000300255_CP004049_2_43;size=6	Methanomethylophilus alvus Mx1201	gb|MH500333.1|	1928	1903	2.14e-05	GGAGCAGTATTAGACTTAATCGTCTG	GGAGCAGTGTTGGACTTAATCGTCTG	0.923077	Porcine
Methanomassiliicocci_GCA_000300255_CP004049_3_11;size=3	Methanomethylophilus alvus Mx1201	gb|KJ577815.1|	1908	1883	1.08e-08	ACATGTAACACAATGCCCAAGTTGGA	ACATGTAACACAATGCCCAAGTTGGA	0.962963	Porcine
Methanomassiliicocci_GCA_000300255_CP004049_3_12;size=3	Methanomethylophilus alvus Mx1201	gb|MH500313.1|	1097	1123	3.00e-09	TTACAGGAGGCAGATAAATGCGTATTC	TTACAGGAGGCAGATAAATGCGTATTC	1	Porcine
Methanomassiliicocci_GCA_000404225_CP005934_2_20;size=2	Methanomassiliicoccus intestinalis Issoire-Mx1	gb|KP233178.1|	2240	2204	1.45e-14	ACACATGTAAGAAATTTTGACTATGTTCTAAAGGAAG	ACACATGTAAGAAATTTTGACTATGTTCTAAAGGAAG	1	Human
Methanomassiliicocci_GCA_000404225_CP005934_2_21;size=2	Methanomassiliicoccus intestinalis Issoire-Mx1	gb|KP233179.1|	312	277	1.07e-10	GCAGATATAACAGTATCGAGAGTAGAACGAGCAATA	GCAGATATAACAGTATCAAGAGTAGAACGAGCAGTA	0.944444	Human
Methanomassiliicocci_GCA_000404225_CP005934_2_23;size=2	Methanomassiliicoccus intestinalis Issoire-Mx1	gb|MG846354.1|	640	676	1.45e-14	AGAGTGTTTGTTTTTACAAATGAGTATCCAAAGTACG	AGAGTGTTTGTTTTTACAAATGAGTATCCAAAGTACG	1	Chicken
Methanomassiliicocci_GCA_000404225_CP005934_2_24;size=2	Methanomassiliicoccus intestinalis Issoire-Mx1	gb|KP233186.1|	604	640	1.45e-14	GAGACCAATTTAACCCAGGACTTGTTAGAATCACCAA	GAGACCAATTTAACCCAGGACTTGTTAGAATCACCAA	1	Human
Methanomassiliicocci_GCA_000404225_CP005934_2_25;size=2	Methanomassiliicoccus intestinalis Issoire-Mx1	gb|KP264969.1|	2161	2126	4.96e-14	AAATGCTCAGTTAAGACCCTGGCAACAGCACTTAGT	AAATGCTCAGTTAAGACCCTGGCAACAGCACTTAGT	1	Human
Methanomassiliicocci_GCA_000404225_CP005934_2_6;size=2	Methanomassiliicoccus intestinalis Issoire-Mx1	gb|KP264967.1|	1544	1508	1.45e-14	AGGACGTGTATAGGCGAAATGCCGCTTCGCGGAATGA	AGGACGTGTATAGGCGAAATGCCGCTTCGCGGAATGA	1	Human
Methanomassiliicocci_GCA_000404225_CP005934_2_7;size=2	Methanomassiliicoccus intestinalis Issoire-Mx1	gb|KP233179.1|	804	769	4.99e-09	ATACAAAGGGACAGCATCACGTCTAAAACCATCCTG	ATACAACGGAACAGCATCACGTCTAAAACCATCTTG	0.916667	Human
Methanomassiliicocci_GCA_000404225_CP005934_2_9;size=2	Methanomassiliicoccus intestinalis Issoire-Mx1	gb|KP264968.1|	1918	1882	1.45e-14	TAACGAAACAGAGCAAGAGCGTGTGGAGCGCTATCGA	TAACGAAACAGAGCAAGAGCGTGTGGAGCGCTATCGA	1	Human
Methanomassiliicocci_GCA_006954445_LVVS01000017_2_1;size=1	Methanomassiliicoccus intestinalis	gb|KP264968.1|	842	805	1.96e-13	GGGAAATTATCCTGATGTAACTGACCGACACGCCAATA	GGGAAATTATCCTGATGTAACTGACCGACACGCCAGTA	0.973684	Human
Methanomassiliicocci_GCA_006954445_LVVS01000017_2_11;size=1	Methanomassiliicoccus intestinalis	gb|KP233179.1|	1033	1069	3.13e-11	ACTGATATGTTTACTAATAATTATGATAATACTGCAG	ACTGATATGTTTACTAATAATTATGTTAATACTTCAG	0.945946	Human
Methanomassiliicocci_GCA_006954445_LVVS01000017_2_3;size=1	Methanomassiliicoccus intestinalis	gb|KP264968.1|	584	548	6.73e-13	GTGGGGTCGACTGGCAGTGTAGAACTGGGAACGAATT	GTGGGGTCGACGGGCAGTGTAGAACTGGGAACGAATT	0.972973	Human
Methanomassiliicocci_GCA_006954445_LVVS01000017_2_4;size=1	Methanomassiliicoccus intestinalis	gb|KP264968.1|	2168	2133	4.99e-09	GAGAATATGAAGAATCCAGAGTTCCGGCCATGGCAG	GAGAATATGCAGAATCCAGTATTCCGGCCATGGCAG	0.916667	Human
Methanomassiliicocci_GCA_006954445_LVVS01000017_2_5;size=1	Methanomassiliicoccus intestinalis	gb|MG846353.1|	771	806	1.07e-10	CGTAACACTGCGCCCCGCTAATATCTTTCTTACTTA	CGTAATACTGCGCCCGGCTAATATCTTTCTTACTTA	0.944444	Chicken
Methanomassiliicocci_GCA_006954475_LVVT01000001_3_38;size=1	Methanomassiliicoccus intestinalis	gb|KP233179.1|	600	638	2.65e-12	TGGTGAAAACACAGTTGATCCTCGTGACATGTTCAATCC	TGGTGAAAACACAGTTGACCCTCGCGACATGTTCAATCC	0.948718	Human
Methanomassiliicocci_GCA_006954475_LVVT01000001_3_40;size=1	Methanomassiliicoccus intestinalis	gb|KP233179.1|	277	310	2.98e-11	TACTGCTCGTTCTACTCTTGATACTGCTATATCT	TACTGCTCGTTCTACTCTTGATACTGTTATATCT	0.916667	Human
Methanomassiliicocci_GCA_006954475_LVVT01000001_3_46;size=1	Methanomassiliicoccus intestinalis	gb|KP233177.1|	1716	1751	4.96e-14	CTCTTAATGCGCAAGACTCACGAGCCCCGTCGGCGT	CTCTTAATGCGCAAGACTCACGAGCCCCGTCGGCGT	1	Human
Methanomassiliicocci_GCA_006954475_LVVT01000001_3_49;size=1	Methanomassiliicoccus intestinalis	gb|KP264969.1|	1410	1446	1.45e-14	GAGGAATACTCTAACCCTGACAACCATCTCCCTCCTA	GAGGAATACTCTAACCCTGACAACCATCTCCCTCCTA	1	Human
Methanomassiliicocci_GCA_006954475_LVVT01000001_3_50;size=1	Methanomassiliicoccus intestinalis	gb|KP264966.1|	776	740	1.45e-14	TAACTGTGCAATTCTCCAGACACGTGGCACAGCATCC	TAACTGTGCAATTCTCCAGACACGTGGCACAGCATCC	1	Human

## Sheet: TableS6-MGEs annotations
protein_id	protein_cluster	contig_id	MGE host order	MGE type	KEGG ID	definition
Ga0255811_10502937_67	PC_00713	Ga0255811_10502937	Methanomicrobiales	virus	K00525	E1.17.4.1A, nrdA, nrdE; ribonucleoside-diphosphate reductase alpha chain [EC:1.17.4.1]	nucleotide synthesis
Ga0181303_100014_66	PC_00713	Ga0181303_100014	Methanoliparales	virus	K00525	E1.17.4.1A, nrdA, nrdE; ribonucleoside-diphosphate reductase alpha chain [EC:1.17.4.1]	nucleotide synthesis
Ga0074193_1000230_34	PC_02546	Ga0074193_1000230	Methanosarcinales	virus	K00560	thyA, TYMS; thymidylate synthase [EC:2.1.1.45]	nucleotide synthesis
Ga0194137_10000078_68	PC_15566	Ga0194137_10000078	Methanosarcinales	plasmid	K00560	thyA, TYMS; thymidylate synthase [EC:2.1.1.45]	nucleotide synthesis
Ga0172381_10000303_72	PC_02546	Ga0172381_10000303	Methanosarcinales	virus	K00560	thyA, TYMS; thymidylate synthase [EC:2.1.1.45]	nucleotide synthesis
Ga0209318_1000159_46	PC_15566	Ga0209318_1000159	Methanosarcinales	virus	K00560	thyA, TYMS; thymidylate synthase [EC:2.1.1.45]	nucleotide synthesis
Ga0209723_1000499_78	PC_02546	Ga0209723_1000499	Methanosarcinales	plasmid	K00560	thyA, TYMS; thymidylate synthase [EC:2.1.1.45]	nucleotide synthesis
Ga0214517_100030_97	PC_02546	Ga0214517_100030	Methanobacteriales	virus	K00560	thyA, TYMS; thymidylate synthase [EC:2.1.1.45]	nucleotide synthesis
JJPA01000071.1@1-56152_10	PC_15566	JJPA01000071.1@1-56152	Methanosarcinales	virus	K00560	thyA, TYMS; thymidylate synthase [EC:2.1.1.45]	nucleotide synthesis
MGV-GENOME-0318983_54	PC_02546	MGV-GENOME-0318983	Methanobacteriales	virus	K00560	thyA, TYMS; thymidylate synthase [EC:2.1.1.45]	nucleotide synthesis
MGV-GENOME-0327529_50	PC_02546	MGV-GENOME-0327529	Methanobacteriales	virus	K00560	thyA, TYMS; thymidylate synthase [EC:2.1.1.45]	nucleotide synthesis
MGV-GENOME-0375013_126	PC_02546	MGV-GENOME-0375013	Methanobacteriales	virus	K00560	thyA, TYMS; thymidylate synthase [EC:2.1.1.45]	nucleotide synthesis
uvig_174040@1-55887_25	PC_02546	uvig_174040@1-55887	Methanobacteriales	virus	K00560	thyA, TYMS; thymidylate synthase [EC:2.1.1.45]	nucleotide synthesis
uvig_208229@1-52893_19	PC_02546	uvig_208229@1-52893	Methanobacteriales	virus	K00560	thyA, TYMS; thymidylate synthase [EC:2.1.1.45]	nucleotide synthesis
Ga0181303_100014_60	PC_02546	Ga0181303_100014	Methanoliparales	virus	K00560	thyA, TYMS; thymidylate synthase [EC:2.1.1.45]	nucleotide synthesis
JAFRMD010000120.1_61	PC_02546	JAFRMD010000120.1	Methanobacteriales	virus	K00560	thyA, TYMS; thymidylate synthase [EC:2.1.1.45]	nucleotide synthesis
MK994522.1_71	PC_02546	MK994522.1	Methanobacteriales	virus	K00560	thyA, TYMS; thymidylate synthase [EC:2.1.1.45]	nucleotide synthesis
CACXMP010000002.1_17	PC_02546	CACXMP010000002.1	Methanobacteriales	virus	K00560	thyA, TYMS; thymidylate synthase [EC:2.1.1.45]	nucleotide synthesis
CACWVY010000014.1@93752-146228_66	PC_02546	CACWVY010000014.1@93752-146228	Methanobacteriales	virus	K00560	thyA, TYMS; thymidylate synthase [EC:2.1.1.45]	nucleotide synthesis
CACXMP010000001.1_100	PC_02546	CACXMP010000001.1	Methanobacteriales	virus	K00560	thyA, TYMS; thymidylate synthase [EC:2.1.1.45]	nucleotide synthesis
JAFUBV010000001.1_19	PC_02546	JAFUBV010000001.1	Methanobacteriales	virus	K00560	thyA, TYMS; thymidylate synthase [EC:2.1.1.45]	nucleotide synthesis
JAFUBV010000001.1_136	PC_02546	JAFUBV010000001.1	Methanobacteriales	virus	K00560	thyA, TYMS; thymidylate synthase [EC:2.1.1.45]	nucleotide synthesis
CACZUM010000001.1@28190-110720_111	PC_02546	CACZUM010000001.1@28190-110720	Methanobacteriales	virus	K00560	thyA, TYMS; thymidylate synthase [EC:2.1.1.45]	nucleotide synthesis
CADBWM010000001.1_326	PC_02546	CADBWM010000001.1	Methanobacteriales	virus	K00560	thyA, TYMS; thymidylate synthase [EC:2.1.1.45]	nucleotide synthesis
CAJMKC010000016.1_20	PC_20034	CAJMKC010000016.1	Methanobacteriales	plasmid	K00609	pyrB, PYR2; aspartate carbamoyltransferase catalytic subunit [EC:2.1.3.2]	nucleotide synthesis
JAFSLI010000010.1_8	PC_20034	JAFSLI010000010.1	Methanobacteriales	plasmid	K00609	pyrB, PYR2; aspartate carbamoyltransferase catalytic subunit [EC:2.1.3.2]	nucleotide synthesis
3300029825.a@Ga0134835_1000148@6000-52000_3		3300029825.a@Ga0134835_1000148@6000-52000	Methanobacteriales	virus	K00610	pyrI; aspartate carbamoyltransferase regulatory subunit	nucleotide synthesis
CADBWM010000001.1_294		CADBWM010000001.1	Methanobacteriales	virus	K00759	APRT, apt; adenine phosphoribosyltransferase [EC:2.4.2.7]	nucleotide synthesis
Ga0123350_10000432_10	PC_00490	Ga0123350_10000432	Methanobacteriales	virus	K00857	tdk, TK; thymidine kinase [EC:2.7.1.21]	nucleotide synthesis
GUT_GENOME170711_3_53	PC_20933	GUT_GENOME170711_3	Methanobacteriales	plasmid	K00939	adk, AK; adenylate kinase [EC:2.7.4.3]	nucleotide synthesis
GUT_GENOME092376_4_62	PC_20933	GUT_GENOME092376_4	Methanobacteriales	plasmid	K00939	adk, AK; adenylate kinase [EC:2.7.4.3]	nucleotide synthesis
MGV-GENOME-0318983_46	PC_12307	MGV-GENOME-0318983	Methanobacteriales	virus	K00942	gmk, GUK1; guanylate kinase [EC:2.7.4.8]	nucleotide synthesis
MGV-GENOME-0327529_49	PC_12307	MGV-GENOME-0327529	Methanobacteriales	virus	K00942	gmk, GUK1; guanylate kinase [EC:2.7.4.8]	nucleotide synthesis
uvig_174040@1-55887_17	PC_12307	uvig_174040@1-55887	Methanobacteriales	virus	K00942	gmk, GUK1; guanylate kinase [EC:2.7.4.8]	nucleotide synthesis
uvig_208229@1-52893_27	PC_12307	uvig_208229@1-52893	Methanobacteriales	virus	K00942	gmk, GUK1; guanylate kinase [EC:2.7.4.8]	nucleotide synthesis
Ga0074193_1000230_35	PC_15516	Ga0074193_1000230	Methanosarcinales	virus	K00943	tmk, DTYMK; dTMP kinase [EC:2.7.4.9]	nucleotide synthesis
JAFUIW010000028.1_32	PC_12075	JAFUIW010000028.1	Methanobacteriales	virus	K00943	tmk, DTYMK; dTMP kinase [EC:2.7.4.9]	nucleotide synthesis
Ga0194137_10000078_69	PC_15516	Ga0194137_10000078	Methanosarcinales	plasmid	K00943	tmk, DTYMK; dTMP kinase [EC:2.7.4.9]	nucleotide synthesis
Ga0209318_1000159_47	PC_15516	Ga0209318_1000159	Methanosarcinales	virus	K00943	tmk, DTYMK; dTMP kinase [EC:2.7.4.9]	nucleotide synthesis
JAFQXD010000016.1@5472-54453_4	PC_12075	JAFQXD010000016.1@5472-54453	Methanobacteriales	virus	K00943	tmk, DTYMK; dTMP kinase [EC:2.7.4.9]	nucleotide synthesis
JAFUHT010000036.1_54	PC_12075	JAFUHT010000036.1	Methanobacteriales	virus	K00943	tmk, DTYMK; dTMP kinase [EC:2.7.4.9]	nucleotide synthesis
JAFRFB010000013.1@60372-110032_45	PC_12075	JAFRFB010000013.1@60372-110032	Methanobacteriales	virus	K00943	tmk, DTYMK; dTMP kinase [EC:2.7.4.9]	nucleotide synthesis
GUT_GENOME170711_3_56	PC_20936	GUT_GENOME170711_3	Methanobacteriales	plasmid	K00945	cmk; CMP/dCMP kinase [EC:2.7.4.25]	nucleotide synthesis
GUT_GENOME092376_4_65	PC_20936	GUT_GENOME092376_4	Methanobacteriales	plasmid	K00945	cmk; CMP/dCMP kinase [EC:2.7.4.25]	nucleotide synthesis
JAHKLR010000056.1_12	PC_01199	JAHKLR010000056.1	Methanobacteriales	plasmid	K00948	PRPS, prsA; ribose-phosphate pyrophosphokinase [EC:2.7.6.1]	nucleotide synthesis
Ga0119875_100108_37	PC_07341	Ga0119875_100108	Methanobacteriales	virus	K00957	cysD; sulfate adenylyltransferase subunit 2 [EC:2.7.7.4]	nucleotide synthesis
Ga0183098_10710_50	PC_07341	Ga0183098_10710	Methanomicrobiales	virus	K00957	cysD; sulfate adenylyltransferase subunit 2 [EC:2.7.7.4]	nucleotide synthesis
Ga0209318_1000159_79	PC_07341	Ga0209318_1000159	Methanosarcinales	virus	K00957	cysD; sulfate adenylyltransferase subunit 2 [EC:2.7.7.4]	nucleotide synthesis
Ga0209492_1000013_34	PC_07341	Ga0209492_1000013	Methanosarcinales	virus	K00957	cysD; sulfate adenylyltransferase subunit 2 [EC:2.7.7.4]	nucleotide synthesis
Ga0265295_1000600_42	PC_07341	Ga0265295_1000600	Methanosarcinales	virus	K00957	cysD; sulfate adenylyltransferase subunit 2 [EC:2.7.7.4]	nucleotide synthesis
JAFRMD010000120.1_152	PC_07341	JAFRMD010000120.1	Methanobacteriales	virus	K00957	cysD; sulfate adenylyltransferase subunit 2 [EC:2.7.7.4]	nucleotide synthesis
CACZOU010000058.1_26	PC_07341	CACZOU010000058.1	Methanobacteriales	virus	K00957	cysD; sulfate adenylyltransferase subunit 2 [EC:2.7.7.4]	nucleotide synthesis
DUGU01000226.1@1-44807_53	PC_00296	DUGU01000226.1@1-44807	Methanomicrobiales	virus	K01493	comEB; dCMP deaminase [EC:3.5.4.12]	nucleotide synthesis
Ga0172381_10000303_32	PC_00296	Ga0172381_10000303	Methanosarcinales	virus	K01493	comEB; dCMP deaminase [EC:3.5.4.12]	nucleotide synthesis
Ga0172381_10000303_62	PC_00296	Ga0172381_10000303	Methanosarcinales	virus	K01493	comEB; dCMP deaminase [EC:3.5.4.12]	nucleotide synthesis
JAFUIW010000028.1_34	PC_00763	JAFUIW010000028.1	Methanobacteriales	virus	K01494	dcd; dCTP deaminase [EC:3.5.4.13]	nucleotide synthesis
Ga0214517_100030_108	PC_04440	Ga0214517_100030	Methanobacteriales	virus	K01494	dcd; dCTP deaminase [EC:3.5.4.13]	nucleotide synthesis
DALR01000063.1_27	PC_05287	DALR01000063.1	Methanonatronarachaeales	plasmid	K01494	dcd; dCTP deaminase [EC:3.5.4.13]	nucleotide synthesis
Ga0247611_10000764_36	PC_04440	Ga0247611_10000764	Methanobacteriales	virus	K01494	dcd; dCTP deaminase [EC:3.5.4.13]	nucleotide synthesis
Ga0326513_10000143_43	PC_04440	Ga0326513_10000143	Methanobacteriales	virus	K01494	dcd; dCTP deaminase [EC:3.5.4.13]	nucleotide synthesis
MGV-GENOME-0318983_44	PC_04440	MGV-GENOME-0318983	Methanobacteriales	virus	K01494	dcd; dCTP deaminase [EC:3.5.4.13]	nucleotide synthesis
MGV-GENOME-0327529_66	PC_04440	MGV-GENOME-0327529	Methanobacteriales	virus	K01494	dcd; dCTP deaminase [EC:3.5.4.13]	nucleotide synthesis
uvig_174040@1-55887_15	PC_04440	uvig_174040@1-55887	Methanobacteriales	virus	K01494	dcd; dCTP deaminase [EC:3.5.4.13]	nucleotide synthesis
uvig_208229@1-52893_29	PC_04440	uvig_208229@1-52893	Methanobacteriales	virus	K01494	dcd; dCTP deaminase [EC:3.5.4.13]	nucleotide synthesis
uvig_364876@1049-50517_54	PC_04440	uvig_364876@1049-50517	Methanobacteriales	virus	K01494	dcd; dCTP deaminase [EC:3.5.4.13]	nucleotide synthesis
JAFRMD010000120.1_60	PC_04440	JAFRMD010000120.1	Methanobacteriales	virus	K01494	dcd; dCTP deaminase [EC:3.5.4.13]	nucleotide synthesis
MK994522.1_85	PC_04440	MK994522.1	Methanobacteriales	virus	K01494	dcd; dCTP deaminase [EC:3.5.4.13]	nucleotide synthesis
GUT_GENOME206223_8@49986-84439_14	PC_04440	GUT_GENOME206223_8@49986-84439	Methanobacteriales	virus	K01494	dcd; dCTP deaminase [EC:3.5.4.13]	nucleotide synthesis
JAFUHT010000036.1_51	PC_00763	JAFUHT010000036.1	Methanobacteriales	virus	K01494	dcd; dCTP deaminase [EC:3.5.4.13]	nucleotide synthesis
CADBWM010000001.1_334	PC_04440	CADBWM010000001.1	Methanobacteriales	virus	K01494	dcd; dCTP deaminase [EC:3.5.4.13]	nucleotide synthesis
MGV-GENOME-0355038_33	PC_04101	MGV-GENOME-0355038	Methanomassiliicoccales	virus	K01520	dut, DUT; dUTP pyrophosphatase [EC:3.6.1.23]	nucleotide synthesis
SRR6824188_SpadScaf_Metabat_bin83_29713_34@1-29713_32	PC_01557	SRR6824188_SpadScaf_Metabat_bin83_29713_34@1-29713	Methanomassiliicoccales	virus	K01520	dut, DUT; dUTP pyrophosphatase [EC:3.6.1.23]	nucleotide synthesis
MGV-GENOME-0375013_78	PC_12322	MGV-GENOME-0375013	Methanobacteriales	virus	K01520	dut, DUT; dUTP pyrophosphatase [EC:3.6.1.23]	nucleotide synthesis
Ga0116649_1000043_19	PC_04101	Ga0116649_1000043	Methanomassiliicoccales	virus	K01520	dut, DUT; dUTP pyrophosphatase [EC:3.6.1.23]	nucleotide synthesis
SRR6824202_SpadScaf_Metabat_bin78_74689_30_18	PC_01557	SRR6824202_SpadScaf_Metabat_bin78_74689_30	Methanobacteriales	virus	K01520	dut, DUT; dUTP pyrophosphatase [EC:3.6.1.23]	nucleotide synthesis
CACXMP010000002.1_18	PC_12322	CACXMP010000002.1	Methanobacteriales	virus	K01520	dut, DUT; dUTP pyrophosphatase [EC:3.6.1.23]	nucleotide synthesis
CACXMP010000001.1_54	PC_12322	CACXMP010000001.1	Methanobacteriales	virus	K01520	dut, DUT; dUTP pyrophosphatase [EC:3.6.1.23]	nucleotide synthesis
CADBWM010000001.1_403	PC_12322	CADBWM010000001.1	Methanobacteriales	virus	K01520	dut, DUT; dUTP pyrophosphatase [EC:3.6.1.23]	nucleotide synthesis
GUT_GENOME170711_3_62	PC_20940	GUT_GENOME170711_3	Methanobacteriales	plasmid	K01524	ppx-gppA; exopolyphosphatase / guanosine-5'-triphosphate,3'-diphosphate pyrophosphatase [EC:3.6.1.11 3.6.1.40]	nucleotide synthesis
GUT_GENOME092376_4_71	PC_20940	GUT_GENOME092376_4	Methanobacteriales	plasmid	K01524	ppx-gppA; exopolyphosphatase / guanosine-5'-triphosphate,3'-diphosphate pyrophosphatase [EC:3.6.1.11 3.6.1.40]	nucleotide synthesis
3300013137.a@Ga0172375_10000208_48		3300013137.a@Ga0172375_10000208	Methanosarcinales	virus	K01591	pyrF; orotidine-5'-phosphate decarboxylase [EC:4.1.1.23]	nucleotide synthesis
LT985084.1_76	PC_03542	LT985084.1	Methanobacteriales	plasmid	K01923	purC; phosphoribosylaminoimidazole-succinocarboxamide synthase [EC:6.3.2.6]	nucleotide synthesis
GUT_GENOME092376_4_109	PC_07387	GUT_GENOME092376_4	Methanobacteriales	plasmid	K01939	purA, ADSS; adenylosuccinate synthase [EC:6.3.4.4]	nucleotide synthesis
Ga0209340_1001372_16	PC_20363	Ga0209340_1001372	Methanosarcinales	virus	K01955	carB, CPA2; carbamoyl-phosphate synthase large subunit [EC:6.3.5.5]	nucleotide synthesis
MBKP01000009.1_7	PC_20363	MBKP01000009.1	Methanosarcinales	plasmid	K01955	carB, CPA2; carbamoyl-phosphate synthase large subunit [EC:6.3.5.5]	nucleotide synthesis
MBKP01000009.1_6	PC_21054	MBKP01000009.1	Methanosarcinales	plasmid	K01956	carA, CPA1; carbamoyl-phosphate synthase small subunit [EC:6.3.5.5]	nucleotide synthesis
LMVM01000003.1_39	PC_00005	LMVM01000003.1	Methanobacteriales	plasmid	K03365	FCY1; cytosine/creatinine deaminase [EC:3.5.4.1 3.5.4.21]	nucleotide synthesis
MSDW01000001.1@744857-769657_17	PC_00005	MSDW01000001.1@744857-769657	Methanonatronarachaeales	virus	K03365	FCY1; cytosine/creatinine deaminase [EC:3.5.4.1 3.5.4.21]	nucleotide synthesis
MGV-GENOME-0355038_42	PC_15705	MGV-GENOME-0355038	Methanomassiliicoccales	virus	K03465	thyX, thy1; thymidylate synthase (FAD) [EC:2.1.1.148]	nucleotide synthesis
SRR6824188_SpadScaf_Metabat_bin83_29713_34@1-29713_38	PC_15705	SRR6824188_SpadScaf_Metabat_bin83_29713_34@1-29713	Methanomassiliicoccales	virus	K03465	thyX, thy1; thymidylate synthase (FAD) [EC:2.1.1.148]	nucleotide synthesis
SRR6824202_SpadScaf_Metabat_bin78_74689_30_12	PC_15705	SRR6824202_SpadScaf_Metabat_bin78_74689_30	Methanobacteriales	virus	K03465	thyX, thy1; thymidylate synthase (FAD) [EC:2.1.1.148]	nucleotide synthesis
OMYV01000027.1_18	PC_02795	OMYV01000027.1	Methanobacteriales	plasmid	K06863	purP; 5-formaminoimidazole-4-carboxamide-1-(beta)-D-ribofuranosyl 5'-monophosphate synthetase [EC:6.3.4.23]	nucleotide synthesis
JAFYAH010000036.1@40000-77000_3	PC_20522	JAFYAH010000036.1@40000-77000	Methanomassiliicoccales	virus	K11175	purN; phosphoribosylglycinamide formyltransferase 1 [EC:2.1.2.2]	nucleotide synthesis
CACWTF010000007.1_6	PC_20522	CACWTF010000007.1	Methanomassiliicoccales	plasmid	K11175	purN; phosphoribosylglycinamide formyltransferase 1 [EC:2.1.2.2]	nucleotide synthesis
CP003363.1_19	PC_05272	CP003363.1	Methanosarcinales	plasmid	K21636	nrdD; ribonucleoside-triphosphate reductase (formate) [EC:1.1.98.6]	nucleotide synthesis
JAFSLI010000029.1_15	PC_15457	JAFSLI010000029.1	Methanobacteriales	virus	K21636	nrdD; ribonucleoside-triphosphate reductase (formate) [EC:1.1.98.6]	nucleotide synthesis
CP003363.1_187	PC_05272	CP003363.1	Methanosarcinales	plasmid	K21636	nrdD; ribonucleoside-triphosphate reductase (formate) [EC:1.1.98.6]	nucleotide synthesis
Ga0134843_1000584_12	PC_05272	Ga0134843_1000584	Methanomicrobiales	virus	K21636	nrdD; ribonucleoside-triphosphate reductase (formate) [EC:1.1.98.6]	nucleotide synthesis
Ga0172381_10000303_34	PC_05272	Ga0172381_10000303	Methanosarcinales	virus	K21636	nrdD; ribonucleoside-triphosphate reductase (formate) [EC:1.1.98.6]	nucleotide synthesis
Ga0194137_10000078_66	PC_05272	Ga0194137_10000078	Methanosarcinales	plasmid	K21636	nrdD; ribonucleoside-triphosphate reductase (formate) [EC:1.1.98.6]	nucleotide synthesis
MGV-GENOME-0375013_76	PC_05272	MGV-GENOME-0375013	Methanobacteriales	virus	K21636	nrdD; ribonucleoside-triphosphate reductase (formate) [EC:1.1.98.6]	nucleotide synthesis
MK994522.1_61	PC_05272	MK994522.1	Methanobacteriales	virus	K21636	nrdD; ribonucleoside-triphosphate reductase (formate) [EC:1.1.98.6]	nucleotide synthesis
CACXMP010000002.1_21	PC_05272	CACXMP010000002.1	Methanobacteriales	virus	K21636	nrdD; ribonucleoside-triphosphate reductase (formate) [EC:1.1.98.6]	nucleotide synthesis
CACXMP010000001.1_52	PC_05272	CACXMP010000001.1	Methanobacteriales	virus	K21636	nrdD; ribonucleoside-triphosphate reductase (formate) [EC:1.1.98.6]	nucleotide synthesis
LT985084.1_75		LT985084.1	Methanobacteriales	plasmid	K23264	purS; phosphoribosylformylglycinamidine synthase subunit PurS [EC:6.3.5.3]	nucleotide synthesis
DALR01000063.1_4	PC_20889	DALR01000063.1	Methanonatronarachaeales	plasmid	K23265	purQ; phosphoribosylformylglycinamidine synthase subunit PurQ / glutaminase [EC:6.3.5.3 3.5.1.2]	nucleotide synthesis
LT985084.1_74	PC_20889	LT985084.1	Methanobacteriales	plasmid	K23265	purQ; phosphoribosylformylglycinamidine synthase subunit PurQ / glutaminase [EC:6.3.5.3 3.5.1.2]	nucleotide synthesis
DALR01000063.1_5	PC_20890	DALR01000063.1	Methanonatronarachaeales	plasmid	K23270	purSL; phosphoribosylformylglycinamidine synthase subunit PurSL [EC:6.3.5.3]	nucleotide synthesis
Ga0209492_1000013_48	PC_08443	Ga0209492_1000013	virus	HK97	K01737	queD, ptpS, PTS; 6-pyruvoyltetrahydropterin/6-carboxytetrahydropterin synthase [EC:4.2.3.12 4.1.2.50]	queuosine DNA modification
JAFRKE010000032.1_18	PC_21104	JAFRKE010000032.1	virus	HK97	K01737	queD, ptpS, PTS; 6-pyruvoyltetrahydropterin/6-carboxytetrahydropterin synthase [EC:4.2.3.12 4.1.2.50]	queuosine DNA modification
Ga0181303_100014_67	PC_05920	Ga0181303_100014	virus	HK97	K06920	queC; 7-cyano-7-deazaguanine synthase [EC:6.3.4.20]	queuosine DNA modification
JAFRKE010000032.1_19	PC_09969	JAFRKE010000032.1	virus	HK97	K06920	queC; 7-cyano-7-deazaguanine synthase [EC:6.3.4.20]	queuosine DNA modification
CP001719.1@404213-476435_28	PC_08394	CP001719.1@404213-476435	#N/A	HK97	K09125	yhhQ; queuosine precursor transporter	queuosine DNA modification
Ga0265295_1001691_21	PC_12108	Ga0265295_1001691	virus	HK97	K09125	yhhQ; queuosine precursor transporter	queuosine DNA modification
JAFRKE010000032.1_17	PC_03541	JAFRKE010000032.1	virus	HK97	K10026	queE; 7-carboxy-7-deazaguanine synthase [EC:4.3.99.3]	queuosine DNA modification
			#N/A
CP002070.1_14	PC_05876	CP002070.1	plasmid	GenBank	K23144	K23144; UDP-N-acetylglucosamine diphosphorylase / glucose-1-phosphate thymidylyltransferase / UDP-N-acetylgalactosamine diphosphorylase / glucosamine-1-phosphate N-acetyltransferase / galactosamine-1-phosphate N-acetyltransferase [EC:2.7.7.23 2.7.7.24 2.7.7.83 2.3.1.157 2.3.1.276]	nucleotide sugar biosynthesis
CP009519.1_6	PC_20195	CP009519.1	plasmid	GenBank	K13019	wbpI, wlbD; UDP-GlcNAc3NAcA epimerase [EC:5.1.3.23]	nucleotide sugar biosynthesis
CP002070.1_15	PC_12117	CP002070.1	plasmid	GenBank	K03431	glmM; phosphoglucosamine mutase [EC:5.4.2.10]	nucleotide sugar biosynthesis
LT985084.1_84	PC_05929	LT985084.1	plasmid	GenBank	K01854	glf; UDP-galactopyranose mutase [EC:5.4.99.9]	nucleotide sugar biosynthesis
CAJKRY010000008.1@50000-84750_1	PC_09835	CAJKRY010000008.1@50000-84750	virus	GenBank	K01784	galE, GALE; UDP-glucose 4-epimerase [EC:5.1.3.2]	nucleotide sugar biosynthesis
CP002070.1_20	PC_06433	CP002070.1	plasmid	GenBank	K01784	galE, GALE; UDP-glucose 4-epimerase [EC:5.1.3.2]	nucleotide sugar biosynthesis
CP002070.1_16	PC_15421	CP002070.1	plasmid	GenBank	K00820	glmS, GFPT; glutamine---fructose-6-phosphate transaminase (isomerizing) [EC:2.6.1.16]	nucleotide sugar biosynthesis
			#N/A
			#N/A
JAFRKE010000032.1_16	PC_01200	JAFRKE010000032.1	virus	GenBank	K01495	GCH1, folE; GTP cyclohydrolase IA [EC:3.5.4.16]	folate biosynthesis
			#N/A
JJPA01000071.1@1-56152_84	PC_12200	JJPA01000071.1@1-56152	virus	10.1038/ismej.2015.31	K00390	cysH; phosphoadenosine phosphosulfate reductase [EC:1.8.4.8 1.8.4.10]	nucleotide synthesis
			#N/A
Ga0123350_10000432_6	PC_07342	Ga0123350_10000432	virus	IMG/VR	K00384	trxB, TRR; thioredoxin reductase (NADPH) [EC:1.8.1.9]
			#N/A
Ga0214517_100030_18	PC_08447	Ga0214517_100030	virus	IMG/VR	K04794	PTH2, PTRH2; peptidyl-tRNA hydrolase, PTH2 family [EC:3.1.1.29]	inhibition of translation of host proteins
DAZJ01000079.1@1-36810_57	0	DAZJ01000079.1@1-36810	virus	GenBank	K07050	AARSD1, ALAX; misacylated tRNA(Ala) deacylase [EC:3.1.1.-]	inhibition of translation of host proteins
CACXMP010000001.1_25	PC_08447	CACXMP010000001.1	virus	GenBank	K04794	PTH2, PTRH2; peptidyl-tRNA hydrolase, PTH2 family [EC:3.1.1.29]	inhibition of translation of host proteins
Ga0265295_1001691_20	PC_05908	Ga0265295_1001691	virus	IMG/VR	phrog_7245	ArdC-like antirestriction protein	antirestriction protein
CP002772.1@1738107-1785386_55	PC_15442	CP002772.1@1738107-1785386	virus	GenBank	phrog_5558	Lar-like restriction allevation protein	antirestriction protein
CP047880.1@999627-1038867_29		CP047880.1@999627-1038867	virus	GenBank	phrog_599	Lar-like restriction allevation protein	antirestriction protein
DAJM01000001.1@22895-60788_43		DAJM01000001.1@22895-60788	virus	GenBank	phrog_5558	Lar-like restriction allevation protein	antirestriction protein
Ga0134835_1001038_40	PC_05284	Ga0134835_1001038	virus	IMG/VR	phrog_5558	Lar-like restriction allevation protein	antirestriction protein
Ga0255811_10502937_16		Ga0255811_10502937	virus	IMG/VR	phrog_5558	Lar-like restriction allevation protein	antirestriction protein
Ga0265295_1001691_3	PC_08465	Ga0265295_1001691	virus	IMG/VR	phrog_5558	Lar-like restriction allevation protein	antirestriction protein
Ga0265295_1001691_4	PC_08465	Ga0265295_1001691	virus	IMG/VR	phrog_5558	Lar-like restriction allevation protein	antirestriction protein
MGV-GENOME-0355038_40		MGV-GENOME-0355038	virus	10.1038/s41564-021-00928-6	phrog_599	Lar-like restriction allevation protein	antirestriction protein
MGV-GENOME-0375013_69	PC_08465	MGV-GENOME-0375013	virus	10.1038/s41564-021-00928-6	phrog_5558	Lar-like restriction allevation protein	antirestriction protein
MK170447.1_5	PC_05284	MK170447.1	virus	GenBank	phrog_5558	Lar-like restriction allevation protein	antirestriction protein
MK170447.1_84	PC_05284	MK170447.1	virus	GenBank	phrog_5558	Lar-like restriction allevation protein	antirestriction protein
SRR11880836_SpadScaf_Metabat_bin42_37880_153@1-37880_38		SRR11880836_SpadScaf_Metabat_bin42_37880_153@1-37880	virus	this study	phrog_599	Lar-like restriction allevation protein	antirestriction protein
CACXMP010000001.1_43	PC_08465	CACXMP010000001.1	virus	GenBank	phrog_5558	Lar-like restriction allevation protein	antirestriction protein
JAIPRP010000001.1@1354223-1387360_39	PC_15442	JAIPRP010000001.1@1354223-1387360	virus	GenBank	phrog_5558	Lar-like restriction allevation protein	antirestriction protein
JAIPRP010000001.1@1354223-1387360_43	PC_15442	JAIPRP010000001.1@1354223-1387360	virus	GenBank	phrog_5558	Lar-like restriction allevation protein	antirestriction protein
Ga0265295_1001691_20	PC_05908	Ga0265295_1001691	virus	IMG/VR	phrog_7245	ArdC-like antirestriction protein	antirestriction protein
JABLXE010000019.1_31	PC_05908	JABLXE010000019.1	virus	GenBank	phrog_7245	ArdC-like antirestriction protein	antirestriction protein
3300029798.a@Ga0239581_1000090@39000-82476_40	PC_05908	3300029798.a@Ga0239581_1000090@39000-82476	virus	10.1038/s41587-020-0718-6	phrog_7245	ArdC-like antirestriction protein	antirestriction protein
CACXMP010000002.1_75	PC_15827	CACXMP010000002.1	virus	10.1038/s41587-019-0202-3	phrog_7245	ArdC-like antirestriction protein	antirestriction protein
JAFRKE010000032.1_62	PC_15827	JAFRKE010000032.1	virus	GenBank	phrog_7245	ArdC-like antirestriction protein	antirestriction protein

## Sheet: TableS7_defense_systems
system type	MGE ID	host order	type of MGE	protein_ids	number of proteins	matched profiles	start	end
SoFic	163_Spad_Metabat_bin123_46136_23@28100-46136	Methanomicrobiales	virus	163_Spad_Metabat_bin123_46136_23@28100-46136_4	1	SoFic__SoFic	5236	6327
BREX_I	LT985084.1	Methanobacteriales	plasmid	LT985084.1_20,LT985084.1_21,LT985084.1_23,LT985084.1_24,LT985084.1_25,LT985084.1_26,LT985084.1_27,LT985084.1_28	8	BREX__brxL,BREX__pglZA,BREX__brxC,BREX__brxB_DUF1788,BREX__brxA_DUF1819,BREX__pglX1,BREX__pglX1,BREX__pglX1	13030	30471
Lamassu-Fam	CP001697.1	Methanococcales	plasmid	CP001697.1_26,CP001697.1_29	2	Lamassu-Fam__LmuA_effector_Mrr,Lamassu-Fam__LmuB_SMC_Mrr	15777	18859
Viperin	CP003363.1	Methanosarcinales	plasmid	CP003363.1_104	1	Viperin__pVip	102048	102884
RloC	LMVM01000003.1	Methanobacteriales	plasmid	LMVM01000003.1_74	1	RloC__RloC	74092	76317
cas_type_IV-B	Ga0183098_10710	Methanomicrobiales	virus	Ga0183098_10710_46,Ga0183098_10710_47,Ga0183098_10710_48	3	typeIV_Cas8, typeIV_Cas7, typeIV_Cas5	31951	34597
cas_type_IV-B	Ga0209318_1000159	Methanosarcinales	virus	Ga0209318_1000159_75,Ga0209318_1000159_76, Ga0209318_1000159_77, Ga0209318_1000159_78	4	typeIV_Cas8, typeIV_Cas11, typeIV_Cas7, typeIV_Cas5	44339	46820
cas_type_IV-B	Ga0265295_1000600	Methanosarcinales	virus	Ga0265295_1000600_43, Ga0265295_1000600_44, Ga0265295_1000600_45, Ga0265295_1000600_46	4	typeIV_Cas5, typeIV_Cas7, typeIV_Cas11, typeIV_Cas8	32994	35527
cas_type_IV-B	JAFRMD010000120.1	Methanobacteriales	virus	JAFRMD010000120.1_156, JAFRMD010000120.1_157, JAFRMD010000120.1_158, JAFRMD010000120.1_159	4	typeIV_Cas5, typeIV_Cas7, typeIV_Cas11, typeIV_Cas8	99068	101673
cas_type_IV-B	CACZOU010000058.1	Methanobacteriales	virus	CACZOU010000058.1_20,CACZOU010000058.1_22, CACZOU010000058.1_23, CACZOU010000058.1_24,CACZOU010000058.1_25	5	typeIV_Cas6, typeIV_Cas8, typeIV_Cas11, typeIV_Cas7, typeIV_Cas5	14051	17352
RM_Type_III	CP003363.1	Methanosarcinales	plasmid	CP003363.1_119,CP003363.1_120	2	RM_Type_III__Type_III_MTases,RM_Type_III__Type_III_REases	117682	122586
RM_Type_IIG	Ga0214517_100030	Methanobacteriales	virus	Ga0214517_100030_11	1	RM_Type_IIG__Type_IIG	4587	6470
RM_Type_IIG	Ga0214925_100249	Methanobacteriales	virus	Ga0214925_100249_36	1	RM_Type_IIG__Type_IIG	28904	30802
RM_Type_III	Ga0226657_10000919	Methanosarcinales	virus	Ga0226657_10000919_14,Ga0226657_10000919_15	2	RM_Type_III__Type_III_REases,RM_Type_III__Type_III_MTases	13437	18253
RM_Type_III	JAGGLK010000002.1@456000-521646	Methanosarcinales	virus	JAGGLK010000002.1@456000-521646_19,JAGGLK010000002.1@456000-521646_20	2	RM_Type_III__Type_III_MTases,RM_Type_III__Type_III_REases	17355	22309
RM_Type_I	L77118.1	Methanococcales	plasmid	L77118.1_53,L77118.1_54,L77118.1_56	3	RM__Type_I_REases,RM__Type_I_S,RM__Type_I_MTases	49453	55944
RM_Type_IIG	L77119.1	Methanococcales	plasmid	L77119.1_3	1	RM_Type_IIG__Type_IIG	1269	4805
RM_Type_IIG	MSDW01000001.1@744857-769657	Methanonatronarachaeales	virus	MSDW01000001.1@744857-769657_16	1	RM_Type_IIG__Type_IIG	12609	16697
RM_Type_II	NC_001336.1	Methanobacteriales	plasmid	NC_001336.1_15,NC_001336.1_16	2	RM_Type_II__Type_II_REases,RM_Type_II__Type_II_MTases	10828	12662
RM_Type_IIG	PGYO01000001.1@399000-456000	Methanobacteriales	virus	PGYO01000001.1@399000-456000_63	1	RM_Type_IIG__Type_IIG	44680	46590
RM_Type_I	rhino20_SpadScaf_Metabat_bin47_73597_10@10260-56483	Methanomicrobiales	virus	rhino20_SS_Metabat_bin47_73597_10@10260-56483_12, rhino20_SS_Metabat_bin47_73597_10@10260-56483_13,rhino20_SS_Metabat_bin47_73597_10@10260-56483_16,rhino20_SS_Metabat_bin47_73597_10@10260-56483_18	4	Orf5, RM__Type_I_REases,RM__Type_I_S,RM__Type_I_MTases	6806	16560
RM_Type_IIG	SUTG01000098.1	Methanobacteriales	plasmid	SUTG01000098.1_5	1	RM_Type_IIG__Type_IIG	1374	4418
RM_Type_II	3300028601.a@Ga0265295_1000380@20430-72288	Methanosarcinales	virus	3300028601.a@Ga0265295_1000380@20430-72288_49,3300028601.a@Ga0265295_1000380@20430-72288_50,3300028601.a@Ga0265295_1000380@20430-72288_51	3	RM_Type_II__Type_II_REases,RM_Type_II__Type_II_MTases,RM_Type_II__Type_II_MTases	39207	43523
RM_Type_II	3300011965.a@Ga0119875_100607	Methanosarcinales	plasmid	3300011965.a@Ga0119875_100607_3,3300011965.a@Ga0119875_100607_4	2	RM_Type_II__Type_II_MTases,RM_Type_II__Type_II_REases	1348	3468
RM_Type_IIG	3300027863.a@Ga0207433_10004970	Korarchaeota	plasmid	3300027863.a@Ga0207433_10004970_3	1	RM_Type_IIG__Type_IIG	1417	3729
RM_Type_II	3300028622.a@Ga0302253_1000727	Methanosarcinales	plasmid	3300028622.a@Ga0302253_1000727_11,3300028622.a@Ga0302253_1000727_12	2	RM_Type_II__Type_II_MTases,RM_Type_II__Type_II_REases	6965	8609
RM_Type_I	3300028622.a@Ga0302253_1000727	Methanosarcinales	plasmid	3300028622.a@Ga0302253_1000727_23,3300028622.a@Ga0302253_1000727_24,3300028622.a@Ga0302253_1000727_25,3300028622.a@Ga0302253_1000727_26	4	RM__Type_I_REases,RM__Type_I_S,RM__Type_I_MTases,RM__Type_I_S	16888	23303
RM_Type_II	3300029202.a@Ga0167843_100396	Methanosarcinales	plasmid	3300029202.a@Ga0167843_100396_1,3300029202.a@Ga0167843_100396_2	2	RM_Type_II__Type_II_REases,RM_Type_II__Type_II_MTases	1	1621
RM_Type_IIG	OW444198.1	Methanobacteriales	virus	OW444198.1_29	1	RM_Type_IIG__Type_IIG	29503	32604
RM_Type_II	JAHDPF010000177.1	Methanosarcinales	plasmid	JAHDPF010000177.1_17, JAHDPF010000177.1_18	2	RM_Type_II__Type_II_REases,RM_Type_II__Type_II_MTases	9062	11214
RM_Type_II	GUT_GENOME264551_9	Methanobacteriales	plasmid	GUT_GENOME264551_9_27,GUT_GENOME264551_9_28	2	RM_Type_II__Type_II_MTases,RM_Type_II__Type_II_REases	40104	42600
RM_Type_IIG	3300027419.a@Ga0209340_1000038@8888-49116	Methanosarcinales	virus	3300027419.a@Ga0209340_1000038@8888-49116_5	1	RM_Type_IIG__Type_IIG	4365	6764
RM_Type_II	3300029821.a@Ga0246092_1000668	Methanosarcinales	virus	3300029821.a@Ga0246092_1000668_26,3300029821.a@Ga0246092_1000668_27,3300029821.a@Ga0246092_1000668_29	3	RM_Type_II__Type_II_MTases,RM_Type_II__Type_II_MTases,RM_Type_II__Type_II_REases	23872	27079
RM_Type_I	LT985084.1	Methanobacteriales	plasmid	LT985084.1_46,LT985084.1_47,LT985084.1_48,LT985084.1_50,LT985084.1_51	5	RM__Type_I_REases,RM__Type_I_MTases,RM__Type_I_S,RM__Type_I_S,RM__Type_I_S	45497	53815
PD-Lambda-1	uvig_163681@1-37984	Methanobacteriales	virus	uvig_163681@1-37984_8	1	PD-Lambda-1__PD-Lambda-1	4405	5970
PD-Lambda-1	uvig_441795@1-46287	Methanobacteriales	virus	uvig_441795@1-46287_49	1	PD-Lambda-1__PD-Lambda-1	40415	41980
AVAST_II	GUT_GENOME264551_9	Methanobacteriales	plasmid	GUT_GENOME264551_9_24	1	AVAST_II__Avs2A	33268	37842
PD-Lambda-1	CACZUM010000001.1@28190-110720	Methanobacteriales	virus	CACZUM010000001.1@28190-110720_136	1	PD-Lambda-1__PD-Lambda-1	78692	80305
AVAST_IV	LT985084.1	Methanobacteriales	plasmid	LT985084.1_37	1	AVAST_IV__Avs4A	36161	40831
PD-Lambda-1	JAFQXD010000029.1	Methanobacteriales	virus	JAFQXD010000029.1_68	1	PD-Lambda-1__PD-Lambda-1	33626	35191
hma	3300013137.a@Ga0172375_10000208	Methanosarcinales	virus	3300013137.a@Ga0172375_10000208_38, 3300013137.a@Ga0172375_10000208_41, 3300013137.a@Ga0172375_10000208_42	3	HmaA, HmaB, HmaC	31633	41508
RM_Type_II	3300029202.a@Ga0167843_100442	Methanosarcinales	plasmid	3300029202.a@Ga0167843_100442_3, 3300029202.a@Ga0167843_100442_4	2	MTase_II, REase_II	1003	3203
RM_Type_II	AP011953.1	Methanobacteriales	plasmid	AP011953.1_8, AP011953.1_9	2	REase_II, MTase_II	6476	8161
RM_Type_II	CAJYDL010000001.1@2306045-2352929	Methanosarcinales	virus	CAJYDL010000001.1@2306045-2352929_49, CAJYDL010000001.1@2306045-2352929_50	2	REase_II, MTase_II	40356	42150
Stk2	DAYV01000004.1@48154-98871	Methanobacteriales	virus	DAYV01000004.1@48154-98871_24	1	Stk2	12529	13785
cas_type_IV-B	Ga0119875_100108	Methanobacteriales	virus	Ga0119875_100108_31, Ga0119875_100108_33, Ga0119875_100108_34, Ga0119875_100108_35	4	typeIV_Cas8, typeIV_Cas11, typeIV_Cas7, typeIV_Cas5	23238	25936
DMS_other	Ga0181303_100014	Methanoliparales	virus	Ga0181303_100014_2, Ga0181303_100014_5, Ga0181303_100014_6	3	MTase_I, Specificity_I, HmaB	6021	11850
DMS_other	3300029821.a@Ga0246092_1000668	Methanosarcinales	virus	3300029821.a@Ga0246092_1000668_39, 3300029821.a@Ga0246092_1000668_40	2	MTase_II, oMTase	32299	34012
cas_type_IV-B	Ga0209492_1000013	Methanosarcinales	virus	Ga0209492_1000013_40, Ga0209492_1000013_41, Ga0209492_1000013_42, Ga0209492_1000013_45	4	typeIV_Cas5, typeIV_Cas7, typeIV_Cas11, typeIV_Cas8	27174	30310
RM_Type_II	JAFRFB010000013.1@60372-110032	Methanobacteriales	virus	JAFRFB010000013.1@60372-110032_46, JAFRFB010000013.1@60372-110032_48	2	REase_II, MTase_II	33735	36105
RM_Type_II	LT607757.1	Methanobacteriales	plasmid	LT607757.1_24, LT607757.1_25	2	REase_II, MTase_II	16221	18118
DMS_other	MK994522.1	Methanobacteriales	virus	MK994522.1_13, MK994522.1_14	2	DrmMII, SspD	8483	10376
RM_Type_II	NC_001336.1	Methanobacteriales	plasmid	NC_001336.1_13	1	REase_II	9636	10301

## Sheet: TableS8_lysins
virus local id	viral protein	protein length	type	for exolysins - associated tail protein	for endolysins - PPG-recognition domain	peptidase_C71	peptidase_C39	glycosyl hydrolase	MCP type	host order
vir013	vir013_00003	308	endolysin		PMBR		150-268		HK97	Methanobacteriales
vir015	vir015_00001	269	endolysin		PMBR	131-265			HK97	Methanobacteriales
vir027	vir027_00049	313	endolysin		PMBR		153-272		HK97	Methanobacteriales
vir034	vir034_00007	211	endolysin			78-171			HK97	Methanomassiliicoccales
vir037	vir037_00054	272	endolysin		PMBR	134-268			HK97	Methanobacteriales
vir041	vir041_00063	228	endolysin		PMBR		79-224		HK97	Methanobacteriales
vir057	vir057_00040	326	endolysin		PG_binding_1		176-326		HK97	Methanobacteriales
vir063	vir063_00053	384	endolysin		PMBR	264-374			HK97	Methanobacteriales
vir063	vir063_00060	351	endolysin		PMBR		194-311		HK97	Methanobacteriales
vir064	vir064_00001	231	endolysin		PMBR	82-230			HK97	Methanobacteriales
vir073	vir073_00051	451	endolysin		Ig		308-447		HK97	Methanobacteriales
vir075	vir075_00056	230	endolysin		PMBR		80-226		HK97	Methanobacteriales
vir078	vir078_00062	228	endolysin		PMBR	89-223			HK97	Methanobacteriales
vir078	vir078_00065	155	endolysin			1-155			HK97	Methanobacteriales
vir078	vir078_00067	560	endolysin		signal peptide			278-456	HK97	Methanobacteriales
vir080	vir080_00051	308	endolysin		PMBR		150-268		HK97	Methanobacteriales
vir087	vir087_00008	243	endolysin		PMBR		82-241		HK97	Methanobacteriales
vir091	vir091_00038	289	endolysin		PMBR	150-289			HK97	Methanobacteriales
vir097	vir097_00013	251	endolysin		PG_binding_1		98-248		HK97	Methanobacteriales
vir114	vir114_00138	432	endolysin		Ig	291-430			HK97	Methanobacteriales
vir114	vir114_00139	435	endolysin		Ig			215-428	HK97	Methanobacteriales
vir118	vir118_00104	272	endolysin		PMBR	131-268			HK97	Methanobacteriales
vir121	vir121_00041	348	endolysin		PMBR		187-306		HK97	Methanobacteriales
vir125	vir125_00018	369	endolysin		PMBR		208-327		HK97	Methanobacteriales
vir126	vir126_00029	230	endolysin		PMBR		78-226		HK97	Methanobacteriales
vir127	vir127_00025	348	endolysin		PMBR		187-306		HK97	Methanobacteriales
vir128	vir128_00046	232	endolysin		PMBR	73-219	79-228		HK97	Methanobacteriales
vir129	vir129_00045	273	endolysin		PMBR	135-269			HK97	Methanobacteriales
vir130	vir130_00061	301	endolysin		PMBR		148-261		HK97	Methanobacteriales
vir164	vir164_00069	232	endolysin		PMBR	78-222			HK97	Methanobacteriales
vir180	vir180_00028	272	endolysin		PMBR	134-268			HK97	Methanobacteriales
vir181	vir181_00070	308	endolysin		PMBR		150-268		HK97	Methanobacteriales
vir184	vir184_00035	300	endolysin		PMBR	190-275			HK97	Methanobacteriales
vir204	vir204_00004	254	endolysin		PG_binding_1		96-247		HK97	Methanobacteriales
vir204	vir204_00021	140	endolysin			3-137			HK97	Methanobacteriales
vir205	vir205_00003	226	endolysin		PMBR	72-213	78-222		HK97	Methanobacteriales
vir213	vir213_00001	269	endolysin		PMBR	61-115;131-265			HK97	Methanobacteriales
vir235	vir235_00050	272	endolysin		PMBR	134-268			HK97	Methanobacteriales
vir237	vir237_00073	272	endolysin		PMBR	134-268			HK97	Methanobacteriales
vir240	vir240_00004	160	endolysin				3-121		HK97	Methanobacteriales
vir249	vir249_00045	272	endolysin		PMBR	134-268			HK97	Methanobacteriales
vir250	vir250_00003	310	endolysin		PMBR		152-270		HK97	Methanobacteriales
vir254	vir254_00010	272	endolysin		PMBR	134-268			HK97	Methanobacteriales
vir258	vir258_00008	307	endolysin		PMBR		150-268		HK97	Methanobacteriales
vir265	vir265_00010	272	endolysin		PMBR	134-268			HK97	Methanobacteriales
vir271	vir271_00003	269	endolysin		PMBR	17-114;131-265			HK97	Methanobacteriales
vir292	vir292_00055	376	endolysin		Ig		226-337		HK97	Methanobacteriales
vir305	vir305_00005	210	endolysin		PG_binding_1	84-184			HK97	Methanobacteriales
vir310	vir310_00001	532	endolysin		Ig	31-115;408-507			HK97	Methanobacteriales
vir310	vir310_00012	269	endolysin		PMBR	129-267			HK97	Methanobacteriales
vir323	vir323_00044	269	endolysin		PMBR	125-264			HK97	Methanobacteriales
vir326	vir326_00045	240	endolysin		PMBR	180-226	81-236		HK97	Methanobacteriales
vir336	vir336_00061	348	endolysin		Ig	207-346			HK97	Methanobacteriales
vir337	vir337_00011	353	endolysin		PG_binding_1		189-311		HK97	Methanobacteriales
vir339	vir339_00083	342	endolysin		PMBR		185-303		HK97	Methanobacteriales
vir340	vir340_00052	288	endolysin		PMBR	148-284			HK97	Methanobacteriales
vir346	vir346_00061	210	endolysin		PG_binding_1	84-184			HK97	Methanobacteriales
vir349	vir349_00044	284	endolysin		PMBR	142-283			HK97	Methanobacteriales
vir350	vir350_00056	222	endolysin		PMBR	78-213			HK97	Methanobacteriales
vir350	vir350_00087	196	endolysin		signal peptide		53-188		HK97	Methanobacteriales
vir351	vir351_00031	242	endolysin		PMBR		78-238		HK97	Methanobacteriales
vir353	vir353_00026	259	endolysin		PMBR		94-255		HK97	Methanobacteriales
vir361	vir361_00069	350	endolysin		Ig	211-346			HK97	Methanobacteriales
vir362	vir362_00049	321	endolysin		PMBR		167-280		HK97	Methanobacteriales
vir364	vir364_00004	322	endolysin		PMBR		171-319		HK97	Methanobacteriales
vir367	vir367_00078	286	endolysin		PMBR	151-281			HK97	Methanobacteriales
vir368	vir368_00002	325	endolysin		PG_binding_1		176-321		HK97	Methanobacteriales
vir385	vir385_00064	228	endolysin		PMBR	73-218	79-224		HK97	Methanobacteriales
vir392	vir392_00029	291	endolysin		PMBR	150-287			HK97	Methanobacteriales
vir395	vir395_00006	320	endolysin		PG_binding_1		170-320		HK97	Methanobacteriales
vir398	vir398_00093	378	endolysin		Ig		227-338		HK97	Methanobacteriales
vir398	vir398_00209	378	endolysin		Ig		227-338		HK97	Methanobacteriales
vir399	vir399_00051	345	endolysin		PMBR	237-332			HK97	Methanobacteriales
vir399	vir399_00053	352	endolysin		PG_binding_1		190-312		HK97	Methanobacteriales
vir401	vir401_00066	223	endolysin		PMBR		78-219		HK97	Methanobacteriales
vir401	vir401_00076	383	endolysin		PMBR	263-373			HK97	Methanobacteriales
vir403	vir403_00054	329	endolysin		PMBR		174-289		HK97	Methanobacteriales
vir406	vir406_00048	226	endolysin		PMBR		78-222		HK97	Methanobacteriales
vir411	vir411_00003	292	endolysin		PMBR	150-288			HK97	Methanobacteriales
vir414	vir414_00029	141	endolysin			1-136			no	Methanobacteriales
vir415	vir415_00071	458	endolysin		Ig		307-419		HK97	Methanobacteriales
vir416	vir416_00257	300	endolysin		PMBR		143-260		HK97	Methanobacteriales
vir416	vir416_00377	107	endolysin			1-97			HK97	Methanobacteriales
vir418	vir418_00009	271	endolysin		PMBR	131-267			HK97	Methanobacteriales
vir420	vir420_00067	308	endolysin		PMBR		150-268		HK97	Methanobacteriales
vir421	vir421_00035	305	endolysin		PMBR	157-305			HK97	Methanobacteriales
vir097	vir097_00010	594	endolysin?		Ig			81-305	HK97	Methanobacteriales
vir115	vir115_00014	585	endolysin?		Ig		335-410	382-585	HK97	Methanobacteriales
vir118	vir118_00106	1090	endolysin?			326-395;612-685;858-1049			HK97	Methanobacteriales
vir160	vir160_00001	584	endolysin?		Ig		411-507	371-581	HK97	Methanobacteriales
vir180	vir180_00030	1041	endolysin?			61-137;309-377;525-626;809-1000			HK97	Methanobacteriales
vir181	vir181_00002	1016	endolysin?			4-65;279-357;483-512;539-613;782-975			HK97	Methanobacteriales
vir183	vir183_00051	573	endolysin?		PMBR		410-534	463-510	HK97	Methanobacteriales
vir222	vir222_00048	588	endolysin?		PMBR		434-548	22-236	HK97	Methanobacteriales
vir249	vir249_00043	1041	endolysin?			61-137;309-377;525-626;809-1000			HK97	Methanobacteriales
vir364	vir364_00005	1598	endolysin?			796-940;1497-1586	1436-1589	583-704;1078-1304	HK97	Methanobacteriales
vir368	vir368_00001	742	endolysin?		Ig		560-659		HK97	Methanobacteriales
vir013	vir013_00018	352	exolysin	baseplate		222-323			HK97	Methanobacteriales
vir015	vir015_00002	864	exolysin	tail spike		671-772			HK97	Methanobacteriales
vir015	vir015_00007	1703	exolysin	tail tape measure		1490-1580			HK97	Methanobacteriales
vir027	vir027_00061	302	exolysin	baseplate		167-271			HK97	Methanobacteriales
vir037	vir037_00047	1493	exolysin	tail tape measure		1276-1370			HK97	Methanobacteriales
vir041	vir041_00061	1102	exolysin	tail spike		961-1100			HK97	Methanobacteriales
vir063	vir063_00052	388	exolysin	baseplate		262-387			HK97	Methanobacteriales
vir073	vir073_00040	428	exolysin	baseplate		233-296;322-405			HK97	Methanobacteriales
vir075	vir075_00049	1514	exolysin	tail tape measure		1306-1396			HK97	Methanobacteriales
vir075	vir075_00054	1032	exolysin	tail spike		887-1027			HK97	Methanobacteriales
vir078	vir078_00068	755	exolysin	tail protein		522-705			HK97	Methanobacteriales
vir078	vir078_00070	1036	exolysin	tail tape measure		788-879;888-972			HK97	Methanobacteriales
vir080	vir080_00037	355	exolysin	baseplate		226-331			HK97	Methanobacteriales
vir087	vir087_00001	1425	exolysin	tail tape measure		1242-1332			HK97	Methanobacteriales
vir087	vir087_00004	605	exolysin	tail spike				113-312	HK97	Methanobacteriales
vir097	vir097_00008	1442	exolysin	tail tape measure		1254-1343			HK97	Methanobacteriales
vir114	vir114_00165	408	exolysin	baseplate		278-383			HK97	Methanobacteriales
vir115	vir115_00010	1397	exolysin	tail tape measure		1195-1285			HK97	Methanobacteriales
vir118	vir118_00096	1818	exolysin	tail tape measure		1392-1448;1665-1755			HK97	Methanobacteriales
vir121	vir121_00038	1096	exolysin	tail spike		904-956;954-1092			HK97	Methanobacteriales
vir125	vir125_00016	1089	exolysin	tail spike		947-1085			HK97	Methanobacteriales
vir126	vir126_00023	587	exolysin	tail protein		442-586			HK97	Methanobacteriales
vir126	vir126_00024	585	exolysin	tail spike		350-547			HK97	Methanobacteriales
vir127	vir127_00022	1096	exolysin	tail spike		954-1092			HK97	Methanobacteriales
vir128	vir128_00042	1509	exolysin	tail tape measure		1305-1395			HK97	Methanobacteriales
vir129	vir129_00037	1388	exolysin	tail tape measure		1184-1274			HK97	Methanobacteriales
vir130	vir130_00047	359	exolysin	baseplate		167-221;236-336			HK97	Methanobacteriales
vir131	vir131_00013	241	exolysin	baseplate		181-236			HK97	Methanobacteriales
vir160	vir160_00005	1480	exolysin	tail tape measure		1275-1368			HK97	Methanobacteriales
vir164	vir164_00062	353	exolysin	baseplate		239-346			HK97	Methanobacteriales
vir180	vir180_00023	1911	exolysin	tail tape measure		1757-1847			HK97	Methanobacteriales
vir181	vir181_00006	2250	exolysin	tail tape measure		2092-2180			HK97	Methanobacteriales
vir183	vir183_00006	612	exolysin	baseplate		472-580			HK97	Methanobacteriales
vir184	vir184_00031	1403	exolysin	tail tape measure		1225-1313			HK97	Methanobacteriales
vir204	vir204_00008	777	exolysin	tail spike		553-740			HK97	Methanobacteriales
vir204	vir204_00011	1193	exolysin	tail tape measure		1035-1123			HK97	Methanobacteriales
vir205	vir205_00051	1482	exolysin	tail tape measure		1281-1371			HK97	Methanobacteriales
vir209	vir209_00014	312	exolysin	baseplate		104-184;191-291			HK97	Methanobacteriales
vir213	vir213_00002	862	exolysin	tail spike		669-770			HK97	Methanobacteriales
vir213	vir213_00006	1539	exolysin	tail tape measure		1326-1416			HK97	Methanobacteriales
vir222	vir222_00041	1496	exolysin	tail tape measure		1294-1384			HK97	Methanobacteriales
vir222	vir222_00046	1057	exolysin	tail spike		928-1056			HK97	Methanobacteriales
vir235	vir235_00043	1566	exolysin	tail tape measure		1349-1443			HK97	Methanobacteriales
vir237	vir237_00067	1897	exolysin	tail tape measure		1743-1833			HK97	Methanobacteriales
vir237	vir237_00075	1042	exolysin	baseplate		526-627;810-1001			HK97	Methanobacteriales
vir240	vir240_00018	355	exolysin	baseplate		226-331			HK97	Methanobacteriales
vir243	vir243_00011	782	exolysin	baseplate		689-769			HK97	Methanobacteriales
vir249	vir249_00050	1902	exolysin	tail tape measure		1748-1838			HK97	Methanobacteriales
vir254	vir254_00017	1566	exolysin	tail tape measure		1349-1443			HK97	Methanobacteriales
vir258	vir258_00020	372	exolysin	baseplate		249-349			HK97	Methanobacteriales
vir265	vir265_00017	1552	exolysin	tail tape measure		1335-1429			HK97	Methanobacteriales
vir271	vir271_00002	862	exolysin	tail spike		669-770			HK97	Methanobacteriales
vir271	vir271_00042	1704	exolysin	tail tape measure		1491-1581			HK97	Methanobacteriales
vir272	vir272_00005	1574	exolysin	tail tape measure		1402-1488			HK97	Methanobacteriales
vir292	vir292_00049	1573	exolysin	tail tape measure		1274-1324;1371-1462			HK97	Methanobacteriales
vir310	vir310_00014	817	exolysin	tail spike		228-320;635-728			HK97	Methanobacteriales
vir310	vir310_00018	1449	exolysin	tail tape measure		1244-1334			HK97	Methanobacteriales
vir326	vir326_00057	425	exolysin	baseplate		317-424			HK97	Methanobacteriales
vir336	vir336_00052	1474	exolysin	tail tape measure		1272-1363			HK97	Methanobacteriales
vir337	vir337_00002	819	exolysin	tail spike				585-803	HK97	Methanobacteriales
vir337	vir337_00014	316	exolysin	baseplate		220-301			HK97	Methanobacteriales
vir339	vir339_00103	349	exolysin	baseplate		218-322			HK97	Methanobacteriales
vir340	vir340_00044	1515	exolysin	tail tape measure		1308-1402			HK97	Methanobacteriales
vir340	vir340_00051	1063	exolysin	tail spike		930-1062			HK97	Methanobacteriales
vir344	vir344_00001	1554	exolysin	tail tape measure		1370-1460			HK97	Methanobacteriales
vir350	vir350_00042	598	exolysin	baseplate		272-376;492-578			HK97	Methanobacteriales
vir351	vir351_00025	1537	exolysin	tail tape measure		1344-1434			HK97	Methanobacteriales
vir353	vir353_00021	1038	exolysin	tail tape measure		890-977			HK97	Methanobacteriales
vir353	vir353_00023	725	exolysin	tail tape measure		505-690			HK97	Methanobacteriales
vir361	vir361_00060	1063	exolysin	tail protein		361-422;686-751;961-1046			HK97	Methanobacteriales
vir362	vir362_00047	1073	exolysin	tail spike		441-472;930-1063			HK97	Methanobacteriales
vir364	vir364_00010	1740	exolysin	tail tape measure		1532-1622			HK97	Methanobacteriales
vir367	vir367_00010	304	exolysin	baseplate		170-302			HK97	Methanobacteriales
vir369	vir369_00011	328	exolysin	baseplate		198-302			HK97	Methanobacteriales
vir385	vir385_00062	762	exolysin	tail spike		635-758			HK97	Methanobacteriales
vir392	vir392_00001	475	exolysin	baseplate		342-442			HK97	Methanobacteriales
vir392	vir392_00197	633	exolysin	baseplate		524-605			HK97	Methanobacteriales
vir395	vir395_00019	399	exolysin	baseplate		306-393			HK97	Methanobacteriales
vir398	vir398_00112	343	exolysin	baseplate		220-320			HK97	Methanobacteriales
vir399	vir399_00048	403	exolysin	tail protein		286-371			HK97	Methanobacteriales
vir399	vir399_00061	871	exolysin	tail spike				613-846	HK97	Methanobacteriales
vir401	vir401_00077	391	exolysin	baseplate		265-390			HK97	Methanobacteriales
vir403	vir403_00046	797	exolysin	baseplate		468-515;661-764			HK97	Methanobacteriales
vir406	vir406_00042	1485	exolysin	tail tape measure		1280-1370			HK97	Methanobacteriales
vir406	vir406_00047	1055	exolysin	tail spike		919-1050			HK97	Methanobacteriales
vir409	vir409_00041	361	exolysin	baseplate		238-338			HK97	Methanobacteriales
vir411	vir411_00080	804	exolysin	baseplate		707-790			HK97	Methanobacteriales
vir413	vir413_00028	353	exolysin	baseplate		218-323			HK97	Methanobacteriales
vir415	vir415_00083	358	exolysin	baseplate		228-329			HK97	Methanobacteriales
vir416	vir416_00229	435	exolysin	baseplate		304-407			HK97	Methanobacteriales
vir416	vir416_00232	279	exolysin	baseplate		179-270			HK97	Methanobacteriales
vir418	vir418_00019	755	exolysin	baseplate		659-742			HK97	Methanobacteriales
vir420	vir420_00053	352	exolysin	baseplate		222-323			HK97	Methanobacteriales
vir165	vir165_00069	659				515-611			no	Methanobacteriales
vir170	vir170_00012	209			signal peptide	98-186			no	Methanobacteriales
vir366	vir366_00039	208			PMBR	64-203			no	Methanobacteriales
vir427	vir427_00017	308			Flg_new	167-274			VP4	Methanomassiliicoccales
vir430	vir430_00019	242			signal peptide	78-182			VP4	Methanomassiliicoccales

## Sheet: TableS9-Ig-domains
local_id	contig_id	Number of Ig-like domains	Number of proteins with Ig-like domain	MCP type	environmnent	Host order
vir003	146_SpadScaf_Metabat2_bin41_76858_4@12000-55000	6	1	HK97	gut	Methanomassiliicoccales
vir006	163_SpadScaf_Metabat2_bin157_47041_7@9000-42000	7	1	HK97	gut	Methanomassiliicoccales
vir007	206_SpadScaf_Metabat2_bin243_182810_0@59597-79030	4	1	DJR	gut	Methanomicrobiales
vir011	49_SpadScaf_Metabat2_bin94_44389_15@127-33921	13	3	HK97	gut	Methanomicrobiales
vir013	59_SpadScaf_Metabat_bin84_128708_14@27011-86086	7	3	HK97	gut	Methanobacteriales
vir015	AELT01000015.1@95198-135571	11	3	HK97	gut	Methanobacteriales
vir019	AM19_Spad_Metabat2_bin53_52369_7@2763-29433	4	2	DJR	gut	Methanomicrobiales
vir027	CACVVD010000002.1	4	1	HK97	gut	Methanobacteriales
vir034	CAJKRY010000008.1@50000-84750	10	3	HK97	gut	Methanomassiliicoccales
vir037	CP000678.1@1693223-1732061	2	1	HK97	gut	Methanobacteriales
vir041	CP001719.1@404213-476435	16	4	HK97	gut	Methanobacteriales
vir057	CP006933.1@1689223-1727486	5	2	HK97	gut	Methanobacteriales
vir063	CP014265.1@2066800-2108000	1	1	HK97	gut	Methanobacteriales
vir065	CP047880.1@999627-1038867	5	1	HK97	gut	Methanomassiliicoccales
vir073	DM36_Spad_Metabat2_bin80_50396_12@1099-43791	11	4	HK97	gut	Methanobacteriales
vir075	FOAK01000003.1@75880-114500	11	6	HK97	gut	Methanobacteriales
vir080	Ga0104061_100552	1	1	HK97	gut	Methanobacteriales
vir114	Ga0214517_100030	14	3	HK97	gut	Methanobacteriales
vir115	Ga0214925_100249	10	3	HK97	gut	Methanobacteriales
vir118	Ga0247611_10000764	7	2	HK97	gut	Methanobacteriales
vir121	Ga0256405_10002290	1	1	HK97	gut	Methanobacteriales
vir125	Ga0326512_10000437	1	1	HK97	gut	Methanobacteriales
vir126	Ga0326513_10000143	10	1	HK97	gut	Methanobacteriales
vir127	Ga0326514_10000248	1	1	HK97	gut	Methanobacteriales
vir128	GG26_Megh_Metabat2_bin63_609729_5@450685-485146	10	3	HK97	gut	Methanobacteriales
vir129	GUT_GENOME029117_5@17845-51994	8	2	HK97	gut	Methanobacteriales
vir131	HG796201.1@65000-105000	5	1	HK97	gut	Methanobacteriales
vir147	JAFXOA010000200.1@1-37594	4	1	HK97	gut	Methanomassiliicoccales
vir148	JAFYAH010000036.1@40000-77000	1	1	HK97	gut	Methanomassiliicoccales
vir149	JAFYFD010000228.1	1	1	HK97	gut	Methanomassiliicoccales
vir150	JAGAJZ010000056.1@1-21899	3	1	DJR	gut	Methanomicrobiales
vir160	KK211376.1@183315-221216	17	5	HK97	gut	Methanobacteriales
vir176	MGV-GENOME-0254337	6	2	HK97	gut	Methanomassiliicoccales
vir177	MGV-GENOME-0256539	8	3	HK97	gut	Methanomassiliicoccales
vir180	MGV-GENOME-0318983	15	3	HK97	gut	Methanobacteriales
vir181	MGV-GENOME-0327529	14	4	HK97	gut	Methanobacteriales
vir183	MGV-GENOME-0375013	38	8	HK97	gut	Methanobacteriales
vir186	MR31_SpadScaf_Metabat2_bin94_140883_1@64671-98501	20	4	HK97	gut	Methanomicrobiales
vir188	MR31_SpadScaf_Metabat2_bin94_97535_4@39446-59639	2	1	DJR	gut	Methanomicrobiales
vir194	MSGU01000057.1@34723-65828	5	2	DJR	gut	Methanomicrobiales
vir205	Pig88_SpadScaf_Metabat_bin21_35779_22@1-35779	12	4	HK97	gut	Methanobacteriales
vir213	SAMEA2737684_a1_ct238341_vs1	17	5	HK97	gut	Methanobacteriales
vir214	SAMN09781779_a1_ct12975_vs1	10	3	HK97	gut	Methanomassiliicoccales
vir215	SRR11880836_SpadScaf_Metabat_bin42_37880_153@1-37880	6	2	HK97	gut	Methanomassiliicoccales
vir222	SUTI01000003.1@98000-140000	15	5	HK97	gut	Methanobacteriales
vir235	uvig_163681@1-37984	2	1	HK97	gut	Methanobacteriales
vir237	uvig_174040@1-55887	14	3	HK97	gut	Methanobacteriales
vir240	uvig_178408@1-52764	1	1	HK97	gut	Methanobacteriales
vir243	uvig_185017@1-40538	9	3	HK97	gut	Methanobacteriales
vir249	uvig_208229@1-52893	15	3	HK97	gut	Methanobacteriales
vir250	uvig_217978@1189-51318	6	3	HK97	gut	Methanobacteriales
vir254	uvig_281916@1-36073	2	1	HK97	gut	Methanobacteriales
vir258	uvig_364876@1049-50517	13	4	HK97	gut	Methanobacteriales
vir259	uvig_368349@1-38348	6	2	HK97	gut	Methanomassiliicoccales
vir265	uvig_441795@1-46287	2	1	HK97	gut	Methanobacteriales
vir271	uvig_558467@2843-38633	5	2	HK97	gut	Methanobacteriales
vir272	uvig_563381@1-34568	7	2	HK97	gut	Methanobacteriales
vir275	uvig_591350@1-37178	7	3	HK97	gut	Methanomassiliicoccales
vir282	WRMT01000138.1	2	1	no	gut	Methanobacteriales
vir292	3300021541.a@Ga0214529_10004@130000-184000	4	3	HK97	gut	Methanobacteriales
vir310	JAHKLT010000048.1	18	6	HK97	gut	Methanobacteriales
vir337	DANR01000010.1@50905-109174	18	4	HK97	gut	Methanobacteriales
vir339	JAFRMD010000120.1	16	5	HK97	gut	Methanobacteriales
vir340	JAFRFD010000004.1@17112-57968	8	3	HK97	gut	Methanobacteriales
vir361	CACXMP010000002.1	17	5	HK97	gut	Methanobacteriales
vir362	CADBWM010000004.1@9584-53040	5	3	HK97	gut	Methanobacteriales
vir366	GUT_GENOME264551_9	18	3	no	gut	Methanobacteriales
vir367	JAFUIW010000028.1	4	2	HK97	gut	Methanobacteriales
vir369	JAFRSC010000016.1@1-54910	3	1	HK97	gut	Methanobacteriales
vir382	CADCFK010000016.1@64647-86696	1	1	HK97	gut	Methanobacteriales
vir385	CACZTX010000001.1@93919-135838	11	3	HK97	gut	Methanobacteriales
vir392	CACXMP010000001.1	38	8	HK97	gut	Methanobacteriales
vir398	JAFUBV010000001.1	16	6	HK97	gut	Methanobacteriales
vir399	JAGCLR010000143.1	36	6	HK97	gut	Methanobacteriales
vir401	JAFRKE010000032.1	2	1	HK97	gut	Methanobacteriales
vir403	JAFQXD010000016.1@5472-54453	13	3	HK97	gut	Methanobacteriales
vir409	GUT_GENOME206223_8@49986-84439	3	2	HK97	gut	Methanobacteriales
vir410	JAFSLI010000029.1	5	2	HK97	gut	Methanobacteriales
vir411	JAFUHT010000036.1	6	2	HK97	gut	Methanobacteriales
vir413	CACZUM010000001.1@28190-110720	3	2	HK97	gut	Methanobacteriales
vir414	LT985084.1	26	4	no	gut	Methanobacteriales
vir415	JAFQXD010000029.1	15	5	HK97	gut	Methanobacteriales
vir416	CADBWM010000001.1	10	5	HK97	gut	Methanobacteriales
vir418	JAFRFB010000013.1@60372-110032	3	2	HK97	gut	Methanobacteriales
vir420	uvig_545215@1-50913	7	3	HK97	gut	Methanobacteriales
vir422	CP005934.1@1790805-1802528	5	1	VP4	gut	Methanomassiliicoccales
vir423	CP005934.1@1659616-1681748	4	1	VP4	gut	Methanomassiliicoccales
vir424	CP005934.1@71166-83218	2	1	VP4	gut	Methanomassiliicoccales
vir425	CP005934.1@965684-996699	12	4	VP4	gut	Methanomassiliicoccales
vir427	163_Spad_Metabat2_bin216_125083_0@36764-58549	8	2	VP4	gut	Methanomassiliicoccales
vir428	GUT_GENOME102627_2@157178-172296	4	1	VP4	gut	Methanomassiliicoccales
vir429	GUT_GENOME283638_1@16458-37281	5	2	VP4	gut	Methanomassiliicoccales
vir430	LVVR01000001.1@1202597-1241350	11	3	VP4	gut	Methanomassiliicoccales
vir431	CP047880.1@1131618-1162542	17	3	VP4	gut	Methanomassiliicoccales
vir433	JAFXWE010000240.1@4288-42989	16	4	VP4	gut	Methanomassiliicoccales
vir434	CAJLZK010000001.1@107524-126497	4	1	VP4	gut	Methanomassiliicoccales
vir436	LJKK01000055.1@70198-97272	9	3	VP4	gut	Methanomassiliicoccales
vir438	LOPS01000042.1@57478-77816	5	2	VP4	gut	Methanomassiliicoccales
vir440	SRR11880825_Spad_Metabat2_bin88_42069_2@14299-32480	8	3	VP4	gut	Methanomassiliicoccales
vir442	GUT_GENOME187666_3@101401-165340	8	3	VP4	gut	Methanomassiliicoccales
vir443	GUT_GENOME155212_10@3-20249	7	2	VP4	gut	Methanomassiliicoccales
vir444	3300021318_27:Ga0214506_1000257@69171-118231	14	4	VP4	gut	Methanomassiliicoccales
vir445	3300029928_14:Ga0116643_1000216@14427-46898	17	5	VP4	gut	Methanomassiliicoccales
vir446	3300029928_14:Ga0116643_1000081@38152-50966	6	1	VP4	gut	Methanomassiliicoccales
vir447	7000000193_13:SRS048870_WUGC_scaffold_42453	9	3	VP4	gut	Methanomassiliicoccales
vir448	LVVT010000016.1	2	1	VP4	gut	Methanomassiliicoccales
vir014	AE010299.1@4680690-4726820	2	1	HK97	non-gut	Methanosarcinales
vir021	AP011953.1	4	1	no	non-gut	Methanobacteriales
vir024	BCNW01000001.1@382673-399038	5	2	DJR	non-gut	Methanomicrobiales
vir025	CAAGSW010000005.1@75000-113000	1	1	HK97	non-gut	Methanosarcinales
vir029	CAIOKB010000183.1@1-73650	1	1	HK97	non-gut	Methanomicrobiales
vir033	CAIYHQ010000098.1	5	1	no	non-gut	Methanosarcinales
vir039	CP001697.1	3	1	no	non-gut	Methanococcales
vir042	CP001787.1@527865-558038	8	2	HK97	non-gut	Methanococcales
vir047	CP002070.1	81	12	no	non-gut	Methanosarcinales
vir048	CP002117.1@2310132-2328599	2	1	DJR	non-gut	Methanomicrobiales
vir049	CP002565.1@1685936-1701465	1	1	HK97	non-gut	Methanosarcinales
vir052	CP002792.1@312062-341038	4	1	HK97	non-gut	Methanococcales
vir056	CP003363.1	39	12	no	non-gut	Methanosarcinales
vir058	CP009519.1	14	4	no	non-gut	Methanosarcinales
vir060	CP009525.1	9	1	no	non-gut	Methanosarcinales
vir061	CP009527.1	24	5	no	non-gut	Methanosarcinales
vir068	DAJM01000001.1@22895-60788	1	1	HK97	non-gut	Methanosarcinales
vir071	DASP01000002.1@107503-149447	4	2	HK97	non-gut	Methanomicrobiales
vir072	DAUQ01000011.1@50000-84000	3	1	HK97	non-gut	Methanomassiliicoccales
vir074	DUGU01000226.1@1-44807	5	3	HK97	non-gut	Methanomicrobiales
vir078	Ga0074195_1000864	1	1	HK97	non-gut	Methanobacteriales
vir093	Ga0134835_1000258	3	1	HK97	non-gut	Methanosarcinales
vir095	Ga0134843_1000584	1	1	HK97	non-gut	Methanomicrobiales
vir097	Ga0134854_1000795	5	2	HK97	non-gut	Methanobacteriales
vir100	Ga0183098_10710	3	1	HK97	non-gut	Methanomicrobiales
vir101	Ga0194137_10000078	5	1	no	non-gut	Methanosarcinales
vir106	Ga0209318_1000159	1	1	HK97	non-gut	Methanosarcinales
vir107	Ga0209340_1001372	2	1	HK97	non-gut	Methanosarcinales
vir112	Ga0209723_1000499	11	4	no	non-gut	Methanosarcinales
vir116	Ga0226657_10000919	2	1	HK97	non-gut	Methanosarcinales
vir122	Ga0265295_1000600	10	4	HK97	non-gut	Methanosarcinales
vir134	Iso3TCLC_10000138	4	2	HK97	non-gut	Methanosarcinales
vir140	JABLXE010000019.1	10	2	HK97	non-gut	Methanosarcinales
vir154	JAHDSG010000174.1@1-38906	1	1	HK97	non-gut	Methanosarcinales
vir170	LT607757.1	4	2	no	non-gut	Methanobacteriales
vir184	MH674343.1	3	1	HK97	non-gut	Methanobacteriales
vir195	MVRA01000001.1	7	2	no	non-gut	Methanocellales
vir198	NC_001336.1	7	2	no	non-gut	Methanobacteriales
vir285	3300005326.a@Ga0074195_1000350@1-65885	2	1	HK97	non-gut	Methanosarcinales
vir291	3300013137.a@Ga0172375_10000208	3	2	HK97	non-gut	Methanosarcinales
vir295	3300027373.a@Ga0209016_1000038@20880-68097	2	1	HK97	non-gut	Methanomicrobiales
vir303	3300029798.a@Ga0239581_1000090@39000-82476	4	1	HK97	non-gut	Methanosarcinales
vir306	DEEP_DOM17A_MAG_00061_000000000085	5	2	HK97	non-gut	Methanosarcinales
vir309	JAENYT010000001.1@253464-292197	3	2	HK97	non-gut	Methanomicrobiales
vir311	3300025706.a@Ga0209507_1000560	6	3	HK97	non-gut	Methanomicrobiales
vir312	S7_bin36_000000000016	14	3	HK97	non-gut	Methanosarcinales
vir315	CAJYDL010000001.1@2306045-2352929	1	1	HK97	non-gut	Methanosarcinales
vir326	3300027419.a@Ga0209340_1000417	1	1	HK97	non-gut	Methanobacteriales
vir333	3300029397.a@Ga0243510_100595	1	1	no	non-gut	Methanosarcinales
vir346	DAYV01000004.1@64537-97240	1	1	HK97	non-gut	Methanobacteriales
vir355	OW444197.1	2	1	spindle	non-gut	Methanogen
vir364	DAJF01000013.1@58335-98291	21	4	HK97	non-gut	Methanobacteriales
vir374	AB_69_Bin_24__342	2	2	HK97	non-gut	Methanosarcinales
vir380	CAILJG010000389.1	4	1	HK97	non-gut	Methanosarcinales
vir393	CAIYAF010000127.1	2	1	HK97	non-gut	Methanomicrobiales
vir394	JAIPRP010000001.1@1354223-1387360	1	1	HK97	non-gut	Methanobacteriales
vir408	3300029821.a@Ga0246092_1000668	6	2	HK97	non-gut	Methanosarcinales
vir412	JAGGMN010000002.1	5	1	no	non-gut	Methanomicrobiales
vir435	DAQS01000002.1@225275-243083	6	3	VP4	non-gut	Methanomassiliicoccales
vir437	DAUY01000016.1@135574-175632	12	4	VP4	non-gut	Methanomassiliicoccales

## Sheet: TableS10-Flgnew_domains
local_id	contig_id	Number of Flg_new domains	Number of proteins with Flg_new domain	MCP type	environmnent	Host order
vir003	146_SpadScaf_Metabat2_bin41_76858_4@12000-55000	4	1	HK97	gut	Methanomassiliicoccales
vir005	163_Spad_Metabat_bin123_46136_23@28100-46136	2	1	DJR	gut	Methanomicrobiales
vir006	163_SpadScaf_Metabat2_bin157_47041_7@9000-42000	4	1	HK97	gut	Methanomassiliicoccales
vir034	CAJKRY010000008.1@50000-84750	5	2	HK97	gut	Methanomassiliicoccales
vir065	CP047880.1@999627-1038867	6	1	HK97	gut	Methanomassiliicoccales
vir176	MGV-GENOME-0254337	4	1	HK97	gut	Methanomassiliicoccales
vir177	MGV-GENOME-0256539	5	2	HK97	gut	Methanomassiliicoccales
vir182	MGV-GENOME-0355038	5	1	HK97	gut	Methanomassiliicoccales
vir208	rhino20_SpadScaf_Metabat_bin47_73597_10@10260-56483	2	2	HK97	gut	Methanomicrobiales
vir214	SAMN09781779_a1_ct12975_vs1	4	1	HK97	gut	Methanomassiliicoccales
vir215	SRR11880836_SpadScaf_Metabat_bin42_37880_153@1-37880	5	2	HK97	gut	Methanomassiliicoccales
vir216	SRR6824188_SpadScaf_Metabat_bin83_29713_34@1-29713	5	1	HK97	gut	Methanomassiliicoccales
vir259	uvig_368349@1-38348	5	2	HK97	gut	Methanomassiliicoccales
vir275	uvig_591350@1-37178	5	2	HK97	gut	Methanomassiliicoccales
vir335	Ga0116649_1000043	5	1	HK97	gut	Methanomassiliicoccales
vir341	SRR6824202_SpadScaf_Metabat_bin78_74689_30	5	1	HK97	gut	Methanomassiliicoccales
vir422	CP005934.1@1790805-1802528	12	2	VP4	gut	Methanomassiliicoccales
vir423	CP005934.1@1659616-1681748	1	2	VP4	gut	Methanomassiliicoccales
vir424	CP005934.1@71166-83218	4	2	VP4	gut	Methanomassiliicoccales
vir425	CP005934.1@965684-996699	32	4	VP4	gut	Methanomassiliicoccales
vir426	CAJKXZ010000002.1@54213-67645	5	2	VP4	gut	Methanomassiliicoccales
vir427	163_Spad_Metabat2_bin216_125083_0@36764-58549	6	2	VP4	gut	Methanomassiliicoccales
vir428	GUT_GENOME102627_2@157178-172296	5	2	VP4	gut	Methanomassiliicoccales
vir429	GUT_GENOME283638_1@16458-37281	1	1	VP4	gut	Methanomassiliicoccales
vir430	LVVR01000001.1@1202597-1241350	11	3	VP4	gut	Methanomassiliicoccales
vir431	CP047880.1@1131618-1162542	21	4	VP4	gut	Methanomassiliicoccales
vir433	JAFXWE010000240.1@4288-42989	25	4	VP4	gut	Methanomassiliicoccales
vir434	CAJLZK010000001.1@107524-126497	6	2	VP4	gut	Methanomassiliicoccales
vir435	DAQS01000002.1@225275-243083	2	1	VP4	non-gut	Methanomassiliicoccales
vir436	LJKK01000055.1@70198-97272	1	1	VP4	gut	Methanomassiliicoccales
vir437	DAUY01000016.1@135574-175632	7	2	VP4	non-gut	Methanomassiliicoccales
vir438	LOPS01000042.1@57478-77816	2	1	VP4	gut	Methanomassiliicoccales
vir439	163_Spad_Metabat2_bin249_32554_13@9016-32517	11	2	VP4	gut	Methanomassiliicoccales
vir440	SRR11880825_Spad_Metabat2_bin88_42069_2@14299-32480	8	3	VP4	gut	Methanomassiliicoccales
vir442	GUT_GENOME187666_3@101401-165340	41	7	VP4	gut	Methanomassiliicoccales
vir443	GUT_GENOME155212_10@3-20249	4	2	VP4	gut	Methanomassiliicoccales
vir444	3300021318_27:Ga0214506_1000257@69171-118231	12	3	VP4	gut	Methanomassiliicoccales
vir445	3300029928_14:Ga0116643_1000216@14427-46898	15	4	VP4	gut	Methanomassiliicoccales
vir446	3300029928_14:Ga0116643_1000081@38152-50966	3	1	VP4	gut	Methanomassiliicoccales
vir447	7000000193_13:SRS048870_WUGC_scaffold_42453	14	3	VP4	gut	Methanomassiliicoccales
vir448	LVVT010000016.1	5	3	VP4	gut	Methanomassiliicoccales
vir072	DAUQ01000011.1@50000-84000	0	0	HK97	non-gut	Methanomassiliicoccales
vir139	JAAYAX010000004.1@145934-188425	0	0	HK97	non-gut	Methanomassiliicoccales
vir147	JAFXOA010000200.1@1-37594	0	0	HK97	gut	Methanomassiliicoccales
vir148	JAFYAH010000036.1@40648-77091	0	0	HK97	gut	Methanomassiliicoccales
vir149	JAFYFD010000228.1	0	0	HK97	gut	Methanomassiliicoccales
vir381	DARW01000066.1@1-34722	0	0	HK97	non-gut	Methanomassiliicoccales
vir383	JAGCAI010000558.1	0	0	HK97	gut	Methanomassiliicoccales
vir396	GUT_GENOME103957_15	0	0	HK97	gut	Methanomassiliicoccales
vir402	JAFOOT010000081.1	0	0	HK97	gut	Methanomassiliicoccales
vir432	CAJE01000019.1@44478-58266	0	0	VP4	gut	Methanomassiliicoccales
vir441	144b144_SpadScaf_Metabat2_bin145_50574_0@16334-33808	0	0	VP4	gut	Methanomassiliicoccales

[truncated: 1 more sheets: TableS11-Annotation of 4 fam]
